# Supplementary material for: Synthesis of Al complexes containing phenoxy-imine ligands and their use as the catalyst precursors for efficient living ring-opening polymerisation of ε-caprolactone
Source: Royal Society of Chemistry journal article supplement (doi:10.1039/b801561a), 2008-01-01
Supplement: b801561a.pdf [file b801561a.pdf]

## Electronic Supplementary Information

Synthesis of Al Complexes Containing Phenoxy-imine Ligands and their Use as the Catalyst  
Precursors for Efficient Living Ring-Opening Polymerisation of  $\epsilon$ -Caprolactone

Jingyu Liu,<sup>a</sup> Naruhito Iwasa,<sup>a,b</sup> and Kotohiro Nomura<sup>a\*</sup>

<sup>a</sup>*Graduate School of Materials Science, Nara Institute of Science and Technology (NAIST),  
8916-5 Takayama, Ikoma, Nara 630-0101, Japan*

<sup>b</sup>*Research Laboratories, Daiso Co., Ltd., 9 Otakasu, Amagasaki, Hyogo 660-0842, Japan*

### Contents

Crystal structure determinations, reports for  $\text{Me}_2\text{Al}[\text{O}-2-\text{R}^1-6-(\text{R}^2\text{N}=\text{CH})\text{C}_6\text{H}_3]$  [ $\text{R}^1 = \text{Me}$  (**1**),  $^t\text{Bu}$  (**2**), H (**3**);  $\text{R}^2 = 2,6\text{-}^i\text{Pr}_2\text{C}_6\text{H}_3$  (**a**),  $^t\text{Bu}$  (**b**), cyclohexyl (**c**), Ph (**e**),  $\text{C}_6\text{F}_5$  (**g**)], (**1a,b**, **2c,e,g**), and  $\text{Me}_2\text{Al}[\mu_2\text{-O}-2-(\text{R}^2\text{N}=\text{CH})\text{C}_6\text{H}_4](\text{AlMe}_3)$  [ $\text{R}^2 = 2,6\text{-}^i\text{Pr}_2\text{C}_6\text{H}_3$  (**3a**),  $^t\text{Bu}$  (**3b**)].

\*Corresponding Author, tel.: +81-743-72-6041, fax: +81-743-72-6049, e-mail:  
nomurak@ms.naist.jp

X-ray Structure Report for  $\text{Me}_2\text{Al}[\text{O}-2\text{-Me}-6-\{(2,6\text{-}^i\text{Pr}_2\text{C}_6\text{H}_3)\text{N}=\text{CH}\}\text{C}_6\text{H}_3]$  (**1a**)

May 15, 2007

## Experimental

### Data Collection

A colorless block crystal of  $C_{22}H_{30}NOAl$  having approximate dimensions of 0.32 x 0.28 x 0.14 mm was mounted on a glass fiber. All measurements were made on a Rigaku RAXIS RAPID imaging plate area detector with graphite monochromated Mo- $K\alpha$  radiation.

Indexing was performed from 3 oscillations that were exposed for 360 seconds. The crystal-to-detector distance was 127.40 mm.

Cell constants and an orientation matrix for data collection corresponded to a C-centered monoclinic cell with dimensions:

$$\begin{aligned} a &= 34.0799(16) \text{ \AA} \\ b &= 8.8107(3) \text{ \AA} & \beta &= 107.7934(18)^\circ \\ c &= 15.1777(6) \text{ \AA} \\ V &= 4339.3(3) \text{ \AA}^3 \end{aligned}$$

For  $Z = 8$  and F.W. = 351.47, the calculated density is  $1.076 \text{ g/cm}^3$ . Based on the systematic absences of:

$$\begin{aligned} hkl: & h+k \pm 2n \\ h0l: & l \pm 2n \end{aligned}$$

packing considerations, a statistical analysis of intensity distribution, and the successful solution and refinement of the structure, the space group was determined to be:

$$C2/c \text{ (#15)}$$

The data were collected at a temperature of  $-30 \pm 1^\circ\text{C}$  to a maximum  $2\theta$  value of  $54.9^\circ$ . A total of 55 oscillation images were collected. A sweep of data was done using  $\omega$  scans from  $130.0$  to  $190.0^\circ$  in  $4.0^\circ$  step, at  $\chi=45.0^\circ$  and  $\phi = 0.0^\circ$ . The exposure rate was  $250.0 \text{ [sec./}^\circ]$ . A second sweep was performed using  $\omega$  scans from  $0.0$  to  $160.0^\circ$  in  $4.0^\circ$  step, at  $\chi=45.0^\circ$  and  $\phi = 210.0^\circ$ . The exposure rate was  $250.0 \text{ [sec./}^\circ]$ . The crystal-to-detector distance was 127.40 mm. Readout was performed in the 0.100 mm pixel mode.

## Data Reduction

Of the 20662 reflections that were collected, 4947 were unique ( $R_{\text{int}} = 0.041$ ); equivalent reflections were merged.

The linear absorption coefficient,  $\mu$ , for Mo-K $\alpha$  radiation is 1.018 cm<sup>-1</sup>. An empirical absorption correction was applied which resulted in transmission factors ranging from 0.713 to 0.986. The data were corrected for Lorentz and polarization effects.

## Structure Solution and Refinement

The structure was solved by direct methods<sup>1</sup> and expanded using Fourier techniques<sup>2</sup>. The non-hydrogen atoms were refined anisotropically. Hydrogen atoms were refined using the riding model. The final cycle of full-matrix least-squares refinement<sup>3</sup> on  $F^2$  was based on 2742 observed reflections and 256 variable parameters and converged (largest parameter shift was 0.00 times its esd) with unweighted and weighted agreement factors of:

$$R1 = \sum ||F_o| - |F_c|| / \sum |F_o| = 0.0430$$

$$wR2 = [ \sum ( w (F_o^2 - F_c^2)^2 ) / \sum w(F_o^2)^2 ]^{1/2} = 0.1333$$

The standard deviation of an observation of unit weight<sup>4</sup> was 1.00. A Sheldrick weighting scheme was used. Plots of  $\sum w (|F_o| - |F_c|)^2$  versus  $|F_o|$ , reflection order in data collection,  $\sin \theta/\lambda$  and various classes of indices showed no unusual trends. The maximum and minimum peaks on the final difference Fourier map corresponded to 0.16 and -0.16 e<sup>-</sup>/Å<sup>3</sup>, respectively.

Neutral atom scattering factors were taken from Cromer and Waber<sup>5</sup>. Anomalous dispersion effects were included in  $F_{\text{calc}}$ <sup>6</sup>; the values for  $\Delta f'$  and  $\Delta f''$  were those of Creagh and McAuley<sup>7</sup>. The values for the mass attenuation coefficients are those of Creagh and Hubbell<sup>8</sup>. All calculations were performed using the CrystalStructure<sup>9,10</sup> crystallographic software package.

## References

(1) SIR92: Altomare, A., Cascarano, G., Giacovazzo, C., Guagliardi, A., Burla, M., Polidori, G., and Camalli, M. (1994) J. Appl. Cryst., 27, 435.

(2) DIRDIF99: Beurskens, P.T., Admiraal, G., Beurskens, G., Bosman, W.P., de Gelder, R., Israel, R. and Smits, J.M.M.(1999). The DIRDIF-99 program system, Technical Report of the Crystallography Laboratory, University of Nijmegen, The Netherlands.

(3) Least Squares function minimized:

$$\sum w(F_o^2 - F_c^2)^2 \quad \text{where } w = \text{Least Squares weights.}$$

(4) Standard deviation of an observation of unit weight:

$$[\sum w(F_o^2 - F_c^2)^2 / (N_o - N_v)]^{1/2}$$

where:  $N_o$  = number of observations  
 $N_v$  = number of variables

(5) Cromer, D. T. & Waber, J. T.; "International Tables for X-ray Crystallography", Vol. IV, The Kynoch Press, Birmingham, England, Table 2.2 A (1974).

(6) Ibers, J. A. & Hamilton, W. C.; Acta Crystallogr., 17, 781 (1964).

(7) Creagh, D. C. & McAuley, W.J. ; "International Tables for Crystallography", Vol C, (A.J.C. Wilson, ed.), Kluwer Academic Publishers, Boston, Table 4.2.6.8, pages 219-222 (1992).

(8) Creagh, D. C. & Hubbell, J.H.; "International Tables for Crystallography", Vol C, (A.J.C. Wilson, ed.), Kluwer Academic Publishers, Boston, Table 4.2.4.3, pages 200-206 (1992).

(9) CrystalStructure 3.8: Crystal Structure Analysis Package, Rigaku and Rigaku/MSO (2000-2006). 9009 New Trails Dr. The Woodlands TX 77381 USA.

(10) CRYSTALS Issue 11: Carruthers, J.R., Rollett, J.S., Betteridge, P.W., Kinna, D., Pearce, L., Larsen, A., and Gabe, E. Chemical Crystallography Laboratory, Oxford, UK. (1999)

## EXPERIMENTAL DETAILS

### A. Crystal Data

|                      |                                                                                                                |
|----------------------|----------------------------------------------------------------------------------------------------------------|
| Empirical Formula    | C <sub>22</sub> H <sub>30</sub> NOAI                                                                           |
| Formula Weight       | 351.47                                                                                                         |
| Crystal Color, Habit | colorless, block                                                                                               |
| Crystal Dimensions   | 0.32 X 0.28 X 0.14 mm                                                                                          |
| Crystal System       | monoclinic                                                                                                     |
| Lattice Type         | C-centered                                                                                                     |
| Indexing Images      | 3 oscillations @ 360.0 seconds                                                                                 |
| Detector Position    | 127.40 mm                                                                                                      |
| Pixel Size           | 0.100 mm                                                                                                       |
| Lattice Parameters   | a = 34.0799(16) Å<br>b = 8.8107(3) Å<br>c = 15.1777(6) Å<br>β = 107.7934(18) °<br>V = 4339.3(3) Å <sup>3</sup> |
| Space Group          | C2/c (#15)                                                                                                     |
| Z value              | 8                                                                                                              |
| D <sub>calc</sub>    | 1.076 g/cm <sup>3</sup>                                                                                        |
| F <sub>000</sub>     | 1520.00                                                                                                        |
| μ(MoKα)              | 1.018 cm <sup>-1</sup>                                                                                         |

## B. Intensity Measurements

|                                                        |                                                                            |
|--------------------------------------------------------|----------------------------------------------------------------------------|
| Diffractometer                                         | Rigaku RAXIS-RAPID                                                         |
| Radiation                                              | MoK $\alpha$ ( $\lambda = 0.71075 \text{ \AA}$ )<br>graphite monochromated |
| Detector Aperture                                      | 280 mm x 256 mm                                                            |
| Data Images                                            | 55 exposures                                                               |
| $\omega$ oscillation Range ( $\chi=45.0, \phi=0.0$ )   | 130.0 - 190.0 $^\circ$                                                     |
| Exposure Rate                                          | 250.0 sec./ $^\circ$                                                       |
| $\omega$ oscillation Range ( $\chi=45.0, \phi=210.0$ ) | 0.0 - 160.0 $^\circ$                                                       |
| Exposure Rate                                          | 250.0 sec./ $^\circ$                                                       |
| Detector Position                                      | 127.40 mm                                                                  |
| Pixel Size                                             | 0.100 mm                                                                   |
| $2\theta_{\max}$                                       | 54.9 $^\circ$                                                              |
| No. of Reflections Measured                            | Total: 20662<br>Unique: 4947 ( $R_{\text{int}} = 0.041$ )                  |
| Corrections                                            | Lorentz-polarization<br>Absorption<br>(trans. factors: 0.713 - 0.986)      |

### C. Structure Solution and Refinement

|                                          |                                                |
|------------------------------------------|------------------------------------------------|
| Structure Solution                       | Direct Methods (SIR92)                         |
| Refinement                               | Full-matrix least-squares on $F^2$             |
| Function Minimized                       | $\sum w (F_o^2 - F_c^2)^2$                     |
| Least Squares Weights                    | $1/[0.0027F_o^2+1.0000\sigma(F_o^2)]/(4F_o^2)$ |
| $2\theta_{\max}$ cutoff                  | 54.9 $^\circ$                                  |
| Anomalous Dispersion                     | All non-hydrogen atoms                         |
| No. Observations ( $I > 2.00\sigma(I)$ ) | 2742                                           |
| No. Variables                            | 256                                            |
| Reflection/Parameter Ratio               | 10.71                                          |
| Residuals: R1 ( $I > 2.00\sigma(I)$ )    | 0.0430                                         |
| Residuals: wR2 ( $I > 2.00\sigma(I)$ )   | 0.1333                                         |
| Goodness of Fit Indicator                | 1.005                                          |
| Max Shift/Error in Final Cycle           | 0.000                                          |
| Maximum peak in Final Diff. Map          | 0.16 e $^-/\text{\AA}^3$                       |
| Minimum peak in Final Diff. Map          | -0.16 e $^-/\text{\AA}^3$                      |



Table 1. Atomic coordinates and  $B_{\text{iso}}/B_{\text{eq}}$

| atom  | x           | y           | z           | $B_{\text{eq}}$ |
|-------|-------------|-------------|-------------|-----------------|
| Al(1) | 0.12132(2)  | 0.32905(7)  | 0.68553(4)  | 3.677(15)       |
| O(1)  | 0.17114(5)  | 0.24788(18) | 0.72364(10) | 4.54(3)         |
| N(1)  | 0.12386(5)  | 0.36746(17) | 0.55871(11) | 3.12(3)         |
| C(1)  | 0.11857(11) | 0.5201(3)   | 0.7489(2)   | 6.18(7)         |
| C(2)  | 0.07904(9)  | 0.1787(3)   | 0.68313(19) | 5.77(7)         |
| C(3)  | 0.19405(7)  | 0.1873(2)   | 0.67660(15) | 3.56(4)         |
| C(4)  | 0.22764(7)  | 0.0943(2)   | 0.72277(18) | 4.63(5)         |
| C(5)  | 0.25158(8)  | 0.0331(2)   | 0.6727(2)   | 5.63(7)         |
| C(6)  | 0.24375(8)  | 0.0608(3)   | 0.5797(2)   | 5.92(7)         |
| C(7)  | 0.21110(8)  | 0.1512(2)   | 0.5333(2)   | 4.83(6)         |
| C(8)  | 0.18576(6)  | 0.2151(2)   | 0.58064(15) | 3.46(4)         |
| C(9)  | 0.15232(6)  | 0.3096(2)   | 0.52876(15) | 3.30(4)         |
| C(10) | 0.23507(10) | 0.0631(3)   | 0.8233(2)   | 7.58(9)         |
| C(11) | 0.09309(6)  | 0.4621(2)   | 0.49464(14) | 3.38(4)         |
| C(12) | 0.05718(7)  | 0.3955(2)   | 0.43854(15) | 4.31(5)         |
| C(13) | 0.02773(8)  | 0.4902(3)   | 0.38040(19) | 6.01(7)         |
| C(14) | 0.03449(10) | 0.6452(4)   | 0.3788(2)   | 6.51(8)         |
| C(15) | 0.07003(10) | 0.7071(3)   | 0.4341(2)   | 5.89(7)         |
| C(16) | 0.10071(8)  | 0.6188(2)   | 0.49389(17) | 4.19(5)         |
| C(17) | 0.05081(9)  | 0.2244(3)   | 0.43367(17) | 5.64(6)         |
| C(18) | 0.06299(12) | 0.1590(3)   | 0.3531(2)   | 7.30(9)         |
| C(19) | 0.00700(11) | 0.1787(4)   | 0.4270(2)   | 9.63(12)        |
| C(20) | 0.14114(9)  | 0.6903(2)   | 0.5489(2)   | 5.35(6)         |
| C(21) | 0.16813(10) | 0.7186(3)   | 0.4867(2)   | 7.22(9)         |
| C(22) | 0.13479(12) | 0.8366(3)   | 0.5984(2)   | 8.40(10)        |

$$B_{\text{eq}} = 8/3 \pi^2 (U_{11}(aa^*)^2 + U_{22}(bb^*)^2 + U_{33}(cc^*)^2 + 2U_{12}(aa^*bb^*)\cos \gamma + 2U_{13}(aa^*cc^*)\cos \beta + 2U_{23}(bb^*cc^*)\cos \alpha)$$

Table 2. Atomic coordinates and  $B_{\text{iso}}$  involving hydrogens/ $B_{\text{eq}}$

| atom  | x       | y       | z      | $B_{\text{eq}}$ |
|-------|---------|---------|--------|-----------------|
| H(1)  | 0.0992  | 0.5857  | 0.7082 | 7.69            |
| H(2)  | 0.1101  | 0.5002  | 0.8019 | 7.69            |
| H(3)  | 0.1449  | 0.5669  | 0.7674 | 7.68            |
| H(4)  | 0.0772  | 0.1653  | 0.7438 | 7.06            |
| H(5)  | 0.0533  | 0.2130  | 0.6433 | 7.10            |
| H(6)  | 0.0860  | 0.0848  | 0.6609 | 7.08            |
| H(7)  | 0.2776  | -0.0361 | 0.7147 | 6.51            |
| H(8)  | 0.2596  | 0.0076  | 0.5402 | 7.44            |
| H(9)  | 0.2063  | 0.1836  | 0.4609 | 6.10            |
| H(10) | 0.1509  | 0.3348  | 0.4592 | 4.03            |
| H(11) | 0.2574  | -0.0057 | 0.8450 | 8.30            |
| H(12) | 0.2414  | 0.1552  | 0.8573 | 8.29            |
| H(13) | 0.2109  | 0.0197  | 0.8315 | 8.30            |
| H(14) | -0.0005 | 0.4510  | 0.3376 | 6.96            |
| H(15) | 0.0089  | 0.7058  | 0.3315 | 7.70            |
| H(16) | 0.0755  | 0.8221  | 0.4272 | 7.11            |
| H(17) | 0.0708  | 0.1730  | 0.4938 | 6.36            |
| H(18) | 0.0481  | 0.2106  | 0.2981 | 8.56            |
| H(19) | 0.0917  | 0.1729  | 0.3637 | 8.58            |
| H(20) | 0.0567  | 0.0538  | 0.3467 | 8.58            |
| H(21) | 0.0008  | 0.2147  | 0.4802 | 11.29           |
| H(22) | -0.0116 | 0.2224  | 0.3731 | 11.28           |
| H(23) | 0.0044  | 0.0713  | 0.4239 | 11.29           |
| H(24) | 0.1556  | 0.6088  | 0.6019 | 6.19            |
| H(25) | 0.1938  | 0.7611  | 0.5214 | 8.60            |
| H(26) | 0.1727  | 0.6254  | 0.4599 | 8.61            |
| H(27) | 0.1542  | 0.7871  | 0.4390 | 8.62            |
| H(28) | 0.1240  | 0.9125  | 0.5529 | 9.88            |
| H(29) | 0.1159  | 0.8182  | 0.6319 | 9.87            |
| H(30) | 0.1603  | 0.8702  | 0.6397 | 9.88            |

$$B_{\text{eq}} = 8/3 \pi^2 (U_{11}(aa^*)^2 + U_{22}(bb^*)^2 + U_{33}(cc^*)^2 + 2U_{12}(aa^*bb^*)\cos \gamma + 2U_{13}(aa^*cc^*)\cos \beta + 2U_{23}(bb^*cc^*)\cos \alpha)$$

Table 3. Anisotropic displacement parameters

| atom  | U <sub>11</sub> | U <sub>22</sub> | U <sub>33</sub> | U <sub>12</sub> | U <sub>13</sub> | U <sub>23</sub> |
|-------|-----------------|-----------------|-----------------|-----------------|-----------------|-----------------|
| Al(1) | 0.0507(4)       | 0.0493(3)       | 0.0384(3)       | 0.0062(3)       | 0.0117(3)       | -0.0019(2)      |
| O(1)  | 0.0539(10)      | 0.0715(10)      | 0.0411(9)       | 0.0140(8)       | 0.0057(7)       | 0.0004(7)       |
| N(1)  | 0.0394(10)      | 0.0349(8)       | 0.0411(9)       | 0.0009(7)       | 0.0075(8)       | -0.0001(6)      |
| C(1)  | 0.109(2)        | 0.0679(16)      | 0.0657(17)      | 0.0114(16)      | 0.0384(17)      | -0.0082(13)     |
| C(2)  | 0.0738(19)      | 0.0914(19)      | 0.0576(16)      | -0.0090(15)     | 0.0254(14)      | 0.0023(13)      |
| C(3)  | 0.0386(12)      | 0.0390(10)      | 0.0526(13)      | -0.0031(9)      | 0.0062(10)      | -0.0019(9)      |
| C(4)  | 0.0450(14)      | 0.0504(13)      | 0.0688(16)      | 0.0039(10)      | -0.0003(12)     | 0.0049(11)      |
| C(5)  | 0.0452(15)      | 0.0535(14)      | 0.107(2)        | 0.0101(11)      | 0.0105(15)      | 0.0062(14)      |
| C(6)  | 0.0629(18)      | 0.0667(16)      | 0.106(2)        | 0.0188(14)      | 0.0413(17)      | 0.0057(16)      |
| C(7)  | 0.0619(16)      | 0.0526(13)      | 0.0779(17)      | 0.0080(12)      | 0.0343(14)      | 0.0048(11)      |
| C(8)  | 0.0394(12)      | 0.0351(10)      | 0.0567(13)      | -0.0015(9)      | 0.0144(10)      | 0.0004(9)       |
| C(9)  | 0.0450(13)      | 0.0350(10)      | 0.0471(12)      | -0.0020(9)      | 0.0167(10)      | 0.0008(8)       |
| C(10) | 0.084(2)        | 0.100(2)        | 0.077(2)        | 0.0298(19)      | -0.0140(17)     | 0.0134(17)      |
| C(11) | 0.0406(12)      | 0.0463(11)      | 0.0406(11)      | 0.0051(9)       | 0.0111(9)       | 0.0057(9)       |
| C(12) | 0.0457(14)      | 0.0751(15)      | 0.0396(12)      | -0.0045(12)     | 0.0078(10)      | 0.0081(11)      |
| C(13) | 0.0445(15)      | 0.118(2)        | 0.0583(17)      | 0.0080(16)      | 0.0039(13)      | 0.0158(16)      |
| C(14) | 0.0609(19)      | 0.109(2)        | 0.074(2)        | 0.0379(18)      | 0.0148(16)      | 0.0265(17)      |
| C(15) | 0.083(2)        | 0.0647(16)      | 0.0773(19)      | 0.0312(15)      | 0.0262(17)      | 0.0195(13)      |
| C(16) | 0.0565(15)      | 0.0451(12)      | 0.0583(14)      | 0.0119(10)      | 0.0185(12)      | 0.0063(10)      |
| C(17) | 0.0780(19)      | 0.0786(16)      | 0.0454(14)      | -0.0366(15)     | 0.0008(13)      | 0.0060(12)      |
| C(18) | 0.137(3)        | 0.0694(17)      | 0.0646(18)      | -0.0240(18)     | 0.0216(19)      | -0.0033(14)     |
| C(19) | 0.115(3)        | 0.162(3)        | 0.080(2)        | -0.081(2)       | 0.016(2)        | -0.002(2)       |
| C(20) | 0.0733(18)      | 0.0416(12)      | 0.0810(19)      | -0.0059(12)     | 0.0128(15)      | 0.0022(11)      |
| C(21) | 0.074(2)        | 0.085(2)        | 0.114(2)        | -0.0154(17)     | 0.0262(19)      | 0.0079(18)      |
| C(22) | 0.142(3)        | 0.0496(16)      | 0.122(3)        | -0.0172(17)     | 0.031(2)        | -0.0195(16)     |

The general temperature factor expression:  $\exp(-2\pi^2(a^2U_{11}h^2 + b^2U_{22}k^2 + c^2U_{33}l^2 + 2a*b*U_{12}hk + 2a*c*U_{13}hl + 2b*c*U_{23}kl))$

Table 4. Bond lengths (Å)

| atom  | atom  | distance   | atom  | atom  | distance   |
|-------|-------|------------|-------|-------|------------|
| Al(1) | O(1)  | 1.7688(17) | Al(1) | N(1)  | 1.9821(18) |
| Al(1) | C(1)  | 1.955(2)   | Al(1) | C(2)  | 1.949(3)   |
| O(1)  | C(3)  | 1.321(3)   | N(1)  | C(9)  | 1.295(2)   |
| N(1)  | C(11) | 1.455(2)   | C(3)  | C(4)  | 1.408(2)   |
| C(3)  | C(8)  | 1.418(3)   | C(4)  | C(5)  | 1.383(4)   |
| C(4)  | C(10) | 1.494(4)   | C(5)  | C(6)  | 1.376(4)   |
| C(6)  | C(7)  | 1.374(3)   | C(7)  | C(8)  | 1.399(3)   |
| C(8)  | C(9)  | 1.437(2)   | C(11) | C(12) | 1.389(2)   |
| C(11) | C(16) | 1.405(2)   | C(12) | C(13) | 1.393(3)   |
| C(12) | C(17) | 1.522(3)   | C(13) | C(14) | 1.386(4)   |
| C(14) | C(15) | 1.359(4)   | C(15) | C(16) | 1.393(3)   |
| C(16) | C(20) | 1.513(3)   | C(17) | C(18) | 1.519(4)   |
| C(17) | C(19) | 1.519(4)   | C(20) | C(21) | 1.527(5)   |
| C(20) | C(22) | 1.541(4)   |       |       |            |

Table 5. Bond lengths involving hydrogens (Å)

| atom  | atom  | distance | atom  | atom  | distance |
|-------|-------|----------|-------|-------|----------|
| C(1)  | H(1)  | 0.950    | C(1)  | H(2)  | 0.950    |
| C(1)  | H(3)  | 0.950    | C(2)  | H(4)  | 0.950    |
| C(2)  | H(5)  | 0.950    | C(2)  | H(6)  | 0.950    |
| C(5)  | H(7)  | 1.104    | C(6)  | H(8)  | 1.033    |
| C(7)  | H(9)  | 1.099    | C(9)  | H(10) | 1.067    |
| C(10) | H(11) | 0.950    | C(10) | H(12) | 0.950    |
| C(10) | H(13) | 0.950    | C(13) | H(14) | 1.042    |
| C(14) | H(15) | 1.087    | C(15) | H(16) | 1.042    |
| C(17) | H(17) | 1.059    | C(18) | H(18) | 0.950    |
| C(18) | H(19) | 0.950    | C(18) | H(20) | 0.950    |
| C(19) | H(21) | 0.950    | C(19) | H(22) | 0.950    |
| C(19) | H(23) | 0.950    | C(20) | H(24) | 1.079    |
| C(21) | H(25) | 0.950    | C(21) | H(26) | 0.950    |
| C(21) | H(27) | 0.950    | C(22) | H(28) | 0.950    |
| C(22) | H(29) | 0.950    | C(22) | H(30) | 0.950    |

Table 6. Bond angles (°)

| atom  | atom  | atom  | angle      | atom  | atom  | atom  | angle      |
|-------|-------|-------|------------|-------|-------|-------|------------|
| O(1)  | Al(1) | N(1)  | 93.68(7)   | O(1)  | Al(1) | C(1)  | 111.89(11) |
| O(1)  | Al(1) | C(2)  | 111.20(10) | N(1)  | Al(1) | C(1)  | 110.71(10) |
| N(1)  | Al(1) | C(2)  | 110.44(9)  | C(1)  | Al(1) | C(2)  | 116.61(15) |
| Al(1) | O(1)  | C(3)  | 130.81(12) | Al(1) | N(1)  | C(9)  | 122.24(13) |
| Al(1) | N(1)  | C(11) | 120.69(14) | C(9)  | N(1)  | C(11) | 117.07(17) |
| O(1)  | C(3)  | C(4)  | 119.4(2)   | O(1)  | C(3)  | C(8)  | 121.34(17) |
| C(4)  | C(3)  | C(8)  | 119.2(2)   | C(3)  | C(4)  | C(5)  | 118.7(2)   |
| C(3)  | C(4)  | C(10) | 118.3(2)   | C(5)  | C(4)  | C(10) | 123.1(2)   |
| C(4)  | C(5)  | C(6)  | 122.2(2)   | C(5)  | C(6)  | C(7)  | 120.1(3)   |
| C(6)  | C(7)  | C(8)  | 120.0(2)   | C(3)  | C(8)  | C(7)  | 119.82(19) |
| C(3)  | C(8)  | C(9)  | 122.6(2)   | C(7)  | C(8)  | C(9)  | 117.6(2)   |
| N(1)  | C(9)  | C(8)  | 126.1(2)   | N(1)  | C(11) | C(12) | 119.17(18) |
| N(1)  | C(11) | C(16) | 118.11(16) | C(12) | C(11) | C(16) | 122.70(18) |
| C(11) | C(12) | C(13) | 117.7(2)   | C(11) | C(12) | C(17) | 122.28(19) |
| C(13) | C(12) | C(17) | 119.9(2)   | C(12) | C(13) | C(14) | 120.6(2)   |
| C(13) | C(14) | C(15) | 120.4(2)   | C(14) | C(15) | C(16) | 121.9(2)   |
| C(11) | C(16) | C(15) | 116.7(2)   | C(11) | C(16) | C(20) | 122.94(19) |
| C(15) | C(16) | C(20) | 120.2(2)   | C(12) | C(17) | C(18) | 110.2(2)   |
| C(12) | C(17) | C(19) | 112.8(2)   | C(18) | C(17) | C(19) | 110.5(2)   |
| C(16) | C(20) | C(21) | 110.2(2)   | C(16) | C(20) | C(22) | 112.2(2)   |
| C(21) | C(20) | C(22) | 111.5(2)   |       |       |       |            |

Table 7. Bond angles involving hydrogens (°)

| atom  | atom  | atom  | angle | atom  | atom  | atom  | angle |
|-------|-------|-------|-------|-------|-------|-------|-------|
| Al(1) | C(1)  | H(1)  | 109.4 | Al(1) | C(1)  | H(2)  | 109.3 |
| Al(1) | C(1)  | H(3)  | 109.7 | H(1)  | C(1)  | H(2)  | 109.5 |
| H(1)  | C(1)  | H(3)  | 109.5 | H(2)  | C(1)  | H(3)  | 109.5 |
| Al(1) | C(2)  | H(4)  | 109.5 | Al(1) | C(2)  | H(5)  | 109.3 |
| Al(1) | C(2)  | H(6)  | 109.6 | H(4)  | C(2)  | H(5)  | 109.5 |
| H(4)  | C(2)  | H(6)  | 109.5 | H(5)  | C(2)  | H(6)  | 109.5 |
| C(4)  | C(5)  | H(7)  | 113.7 | C(6)  | C(5)  | H(7)  | 124.1 |
| C(5)  | C(6)  | H(8)  | 122.9 | C(7)  | C(6)  | H(8)  | 116.8 |
| C(6)  | C(7)  | H(9)  | 120.8 | C(8)  | C(7)  | H(9)  | 118.9 |
| N(1)  | C(9)  | H(10) | 117.0 | C(8)  | C(9)  | H(10) | 116.8 |
| C(4)  | C(10) | H(11) | 109.8 | C(4)  | C(10) | H(12) | 109.7 |
| C(4)  | C(10) | H(13) | 108.9 | H(11) | C(10) | H(12) | 109.5 |
| H(11) | C(10) | H(13) | 109.5 | H(12) | C(10) | H(13) | 109.5 |
| C(12) | C(13) | H(14) | 123.1 | C(14) | C(13) | H(14) | 116.3 |
| C(13) | C(14) | H(15) | 113.0 | C(15) | C(14) | H(15) | 126.6 |
| C(14) | C(15) | H(16) | 118.8 | C(16) | C(15) | H(16) | 119.1 |
| C(12) | C(17) | H(17) | 109.7 | C(18) | C(17) | H(17) | 105.7 |
| C(19) | C(17) | H(17) | 107.7 | C(17) | C(18) | H(18) | 108.8 |
| C(17) | C(18) | H(19) | 109.6 | C(17) | C(18) | H(20) | 110.1 |
| H(18) | C(18) | H(19) | 109.5 | H(18) | C(18) | H(20) | 109.5 |
| H(19) | C(18) | H(20) | 109.5 | C(17) | C(19) | H(21) | 108.9 |
| C(17) | C(19) | H(22) | 109.6 | C(17) | C(19) | H(23) | 110.0 |
| H(21) | C(19) | H(22) | 109.5 | H(21) | C(19) | H(23) | 109.5 |
| H(22) | C(19) | H(23) | 109.5 | C(16) | C(20) | H(24) | 105.5 |
| C(21) | C(20) | H(24) | 110.2 | C(22) | C(20) | H(24) | 107.1 |
| C(20) | C(21) | H(25) | 110.4 | C(20) | C(21) | H(26) | 109.4 |
| C(20) | C(21) | H(27) | 108.6 | H(25) | C(21) | H(26) | 109.5 |
| H(25) | C(21) | H(27) | 109.5 | H(26) | C(21) | H(27) | 109.5 |
| C(20) | C(22) | H(28) | 108.4 | C(20) | C(22) | H(29) | 109.7 |
| C(20) | C(22) | H(30) | 110.3 | H(28) | C(22) | H(29) | 109.5 |
| H(28) | C(22) | H(30) | 109.5 | H(29) | C(22) | H(30) | 109.5 |

Table 8. Torsion Angles(°)

| atom1 | atom2 | atom3 | atom4 | angle       | atom1 | atom2 | atom3 | atom4 | angle       |
|-------|-------|-------|-------|-------------|-------|-------|-------|-------|-------------|
| O(1)  | Al(1) | N(1)  | C(9)  | 11.98(15)   | O(1)  | Al(1) | N(1)  | C(11) | -168.58(13) |
| N(1)  | Al(1) | O(1)  | C(3)  | -20.80(19)  | C(1)  | Al(1) | O(1)  | C(3)  | -134.9(2)   |
| C(2)  | Al(1) | O(1)  | C(3)  | 92.8(2)     | C(1)  | Al(1) | N(1)  | C(9)  | 127.04(17)  |
| C(1)  | Al(1) | N(1)  | C(11) | -53.51(17)  | C(2)  | Al(1) | N(1)  | C(9)  | -102.27(17) |
| C(2)  | Al(1) | N(1)  | C(11) | 77.17(16)   | Al(1) | O(1)  | C(3)  | C(4)  | -162.92(16) |
| Al(1) | O(1)  | C(3)  | C(8)  | 17.7(3)     | Al(1) | N(1)  | C(9)  | C(8)  | -1.4(2)     |
| Al(1) | N(1)  | C(11) | C(12) | -88.7(2)    | Al(1) | N(1)  | C(11) | C(16) | 89.9(2)     |
| C(9)  | N(1)  | C(11) | C(12) | 90.8(2)     | C(9)  | N(1)  | C(11) | C(16) | -90.7(2)    |
| C(11) | N(1)  | C(9)  | C(8)  | 179.14(17)  | O(1)  | C(3)  | C(4)  | C(5)  | -179.3(2)   |
| O(1)  | C(3)  | C(4)  | C(10) | 2.3(3)      | O(1)  | C(3)  | C(8)  | C(7)  | 178.87(19)  |
| O(1)  | C(3)  | C(8)  | C(9)  | -0.1(2)     | C(4)  | C(3)  | C(8)  | C(7)  | -0.5(3)     |
| C(4)  | C(3)  | C(8)  | C(9)  | -179.45(19) | C(8)  | C(3)  | C(4)  | C(5)  | 0.1(2)      |
| C(8)  | C(3)  | C(4)  | C(10) | -178.3(2)   | C(3)  | C(4)  | C(5)  | C(6)  | 0.4(3)      |
| C(10) | C(4)  | C(5)  | C(6)  | 178.7(2)    | C(4)  | C(5)  | C(6)  | C(7)  | -0.4(3)     |
| C(5)  | C(6)  | C(7)  | C(8)  | -0.0(3)     | C(6)  | C(7)  | C(8)  | C(3)  | 0.5(3)      |
| C(6)  | C(7)  | C(8)  | C(9)  | 179.5(2)    | C(3)  | C(8)  | C(9)  | N(1)  | -7.2(3)     |
| C(7)  | C(8)  | C(9)  | N(1)  | 173.80(19)  | N(1)  | C(11) | C(12) | C(13) | 177.8(2)    |
| N(1)  | C(11) | C(12) | C(17) | -7.0(3)     | N(1)  | C(11) | C(16) | C(15) | -177.8(2)   |
| N(1)  | C(11) | C(16) | C(20) | 6.7(3)      | C(12) | C(11) | C(16) | C(15) | 0.7(4)      |
| C(12) | C(11) | C(16) | C(20) | -174.8(2)   | C(16) | C(11) | C(12) | C(13) | -0.7(3)     |
| C(16) | C(11) | C(12) | C(17) | 174.5(2)    | C(11) | C(12) | C(13) | C(14) | 0.4(4)      |
| C(11) | C(12) | C(17) | C(18) | -94.6(2)    | C(11) | C(12) | C(17) | C(19) | 141.4(2)    |
| C(13) | C(12) | C(17) | C(18) | 80.6(3)     | C(13) | C(12) | C(17) | C(19) | -43.4(3)    |
| C(17) | C(12) | C(13) | C(14) | -175.0(2)   | C(12) | C(13) | C(14) | C(15) | -0.0(4)     |
| C(13) | C(14) | C(15) | C(16) | -0.0(5)     | C(14) | C(15) | C(16) | C(11) | -0.3(4)     |
| C(14) | C(15) | C(16) | C(20) | 175.3(3)    | C(11) | C(16) | C(20) | C(21) | 99.1(3)     |
| C(11) | C(16) | C(20) | C(22) | -136.0(2)   | C(15) | C(16) | C(20) | C(21) | -76.2(3)    |
| C(15) | C(16) | C(20) | C(22) | 48.7(4)     |       |       |       |       |             |

The sign is positive if when looking from atom 2 to atom 3 a clock-wise motion of atom 1 would superimpose it on atom 4.



Table 9. Distances beyond the asymmetric unit out to 3.60 Å

| atom | atom                | distance | atom | atom | distance |
|------|---------------------|----------|------|------|----------|
| C(7) | C(7) <sup>(1)</sup> | 3.567(4) |      |      |          |

Symmetry Operators:

(1)  $-X+1/2, -Y+1/2, -Z+1$

Table 10. Distances beyond the asymmetric unit out to 3.60 Å involving hydrogens

| atom  | atom                | distance | atom  | atom                | distance |
|-------|---------------------|----------|-------|---------------------|----------|
| Al(1) | H(7) <sup>1</sup>   | 3.519    | O(1)  | H(7) <sup>1</sup>   | 2.559    |
| O(1)  | H(27) <sup>2</sup>  | 3.503    | O(1)  | H(30) <sup>3</sup>  | 3.542    |
| C(1)  | H(7) <sup>1</sup>   | 3.446    | C(1)  | H(10) <sup>2</sup>  | 3.299    |
| C(1)  | H(19) <sup>2</sup>  | 3.488    | C(1)  | H(26) <sup>2</sup>  | 3.420    |
| C(2)  | H(15) <sup>4</sup>  | 3.106    | C(2)  | H(20) <sup>5</sup>  | 3.478    |
| C(2)  | H(23) <sup>6</sup>  | 3.571    | C(2)  | H(29) <sup>3</sup>  | 3.587    |
| C(3)  | H(7) <sup>1</sup>   | 2.936    | C(3)  | H(11) <sup>1</sup>  | 3.239    |
| C(3)  | H(28) <sup>3</sup>  | 3.514    | C(3)  | H(30) <sup>3</sup>  | 3.008    |
| C(4)  | H(7) <sup>1</sup>   | 3.412    | C(4)  | H(30) <sup>3</sup>  | 2.998    |
| C(5)  | H(3) <sup>7</sup>   | 3.376    | C(5)  | H(12) <sup>7</sup>  | 3.379    |
| C(5)  | H(25) <sup>3</sup>  | 3.482    | C(5)  | H(30) <sup>3</sup>  | 3.323    |
| C(6)  | H(9) <sup>8</sup>   | 2.997    | C(6)  | H(25) <sup>3</sup>  | 3.120    |
| C(6)  | H(26) <sup>8</sup>  | 3.492    | C(7)  | H(8) <sup>8</sup>   | 3.458    |
| C(7)  | H(9) <sup>8</sup>   | 3.145    | C(7)  | H(11) <sup>1</sup>  | 3.534    |
| C(7)  | H(13) <sup>9</sup>  | 3.412    | C(7)  | H(25) <sup>3</sup>  | 3.482    |
| C(8)  | H(11) <sup>1</sup>  | 3.121    | C(8)  | H(28) <sup>3</sup>  | 3.343    |
| C(8)  | H(30) <sup>3</sup>  | 3.357    | C(9)  | H(11) <sup>1</sup>  | 3.490    |
| C(10) | H(7) <sup>1</sup>   | 3.583    | C(10) | H(8) <sup>5</sup>   | 3.200    |
| C(10) | H(9) <sup>5</sup>   | 3.361    | C(10) | H(24) <sup>7</sup>  | 3.570    |
| C(10) | H(25) <sup>7</sup>  | 3.314    | C(10) | H(30) <sup>3</sup>  | 3.579    |
| C(11) | H(2) <sup>10</sup>  | 3.169    | C(12) | H(2) <sup>10</sup>  | 3.269    |
| C(13) | H(2) <sup>10</sup>  | 3.370    | C(13) | H(14) <sup>11</sup> | 3.171    |
| C(14) | H(2) <sup>10</sup>  | 3.389    | C(14) | H(4) <sup>10</sup>  | 3.305    |
| C(14) | H(5) <sup>4</sup>   | 3.163    | C(14) | H(14) <sup>11</sup> | 3.569    |
| C(14) | H(15) <sup>11</sup> | 3.126    | C(14) | H(21) <sup>4</sup>  | 3.020    |
| C(15) | H(2) <sup>10</sup>  | 3.302    | C(15) | H(4) <sup>10</sup>  | 3.178    |
| C(15) | H(20) <sup>12</sup> | 3.306    | C(15) | H(21) <sup>4</sup>  | 3.148    |
| C(16) | H(2) <sup>10</sup>  | 3.204    | C(18) | H(4) <sup>9</sup>   | 3.412    |
| C(18) | H(16) <sup>3</sup>  | 3.157    | C(18) | H(22) <sup>11</sup> | 3.390    |
| C(19) | H(18) <sup>11</sup> | 3.369    | C(19) | H(23) <sup>6</sup>  | 3.266    |
| C(21) | H(2) <sup>10</sup>  | 3.479    | C(21) | H(8) <sup>8</sup>   | 3.290    |
| C(21) | H(11) <sup>1</sup>  | 3.593    | C(21) | H(12) <sup>1</sup>  | 3.313    |
| C(22) | H(6) <sup>12</sup>  | 3.068    | H(1)  | H(14) <sup>4</sup>  | 3.237    |
| H(1)  | H(18) <sup>2</sup>  | 3.095    | H(1)  | H(19) <sup>2</sup>  | 3.245    |
| H(1)  | H(22) <sup>4</sup>  | 3.323    | H(2)  | C(11) <sup>2</sup>  | 3.169    |
| H(2)  | C(12) <sup>2</sup>  | 3.269    | H(2)  | C(13) <sup>2</sup>  | 3.370    |
| H(2)  | C(14) <sup>2</sup>  | 3.389    | H(2)  | C(15) <sup>2</sup>  | 3.302    |

Table 10. Distances beyond the asymmetric unit out to 3.60 Å involving hydrogens (continued)

| atom  | atom               | distance | atom  | atom               | distance |
|-------|--------------------|----------|-------|--------------------|----------|
| H(2)  | C(16) <sup>2</sup> | 3.204    | H(2)  | C(21) <sup>2</sup> | 3.479    |
| H(2)  | H(10) <sup>2</sup> | 2.778    | H(2)  | H(18) <sup>2</sup> | 3.300    |
| H(2)  | H(19) <sup>2</sup> | 3.151    | H(2)  | H(26) <sup>2</sup> | 2.899    |
| H(2)  | H(27) <sup>2</sup> | 3.329    | H(3)  | C(5) <sup>1</sup>  | 3.376    |
| H(3)  | H(7) <sup>1</sup>  | 2.726    | H(3)  | H(10) <sup>2</sup> | 2.982    |
| H(3)  | H(19) <sup>2</sup> | 3.507    | H(3)  | H(26) <sup>2</sup> | 3.258    |
| H(4)  | C(14) <sup>2</sup> | 3.305    | H(4)  | C(15) <sup>2</sup> | 3.178    |
| H(4)  | C(18) <sup>5</sup> | 3.412    | H(4)  | H(15) <sup>4</sup> | 3.024    |
| H(4)  | H(15) <sup>2</sup> | 3.221    | H(4)  | H(16) <sup>2</sup> | 2.804    |
| H(4)  | H(19) <sup>5</sup> | 3.448    | H(4)  | H(20) <sup>5</sup> | 2.706    |
| H(4)  | H(27) <sup>2</sup> | 3.330    | H(5)  | C(14) <sup>4</sup> | 3.163    |
| H(5)  | H(14) <sup>4</sup> | 3.521    | H(5)  | H(15) <sup>4</sup> | 2.374    |
| H(5)  | H(23) <sup>6</sup> | 3.155    | H(6)  | C(22) <sup>3</sup> | 3.068    |
| H(6)  | H(20) <sup>5</sup> | 3.488    | H(6)  | H(23) <sup>6</sup> | 3.258    |
| H(6)  | H(28) <sup>3</sup> | 2.823    | H(6)  | H(29) <sup>3</sup> | 2.650    |
| H(6)  | H(30) <sup>3</sup> | 3.254    | H(7)  | Al(1) <sup>7</sup> | 3.519    |
| H(7)  | O(1) <sup>7</sup>  | 2.559    | H(7)  | C(1) <sup>7</sup>  | 3.446    |
| H(7)  | C(3) <sup>7</sup>  | 2.936    | H(7)  | C(4) <sup>7</sup>  | 3.412    |
| H(7)  | C(10) <sup>7</sup> | 3.583    | H(7)  | H(3) <sup>7</sup>  | 2.726    |
| H(7)  | H(12) <sup>7</sup> | 2.929    | H(7)  | H(24) <sup>7</sup> | 3.269    |
| H(8)  | C(7) <sup>8</sup>  | 3.458    | H(8)  | C(10) <sup>9</sup> | 3.200    |
| H(8)  | C(21) <sup>8</sup> | 3.290    | H(8)  | H(9) <sup>8</sup>  | 2.960    |
| H(8)  | H(10) <sup>8</sup> | 3.348    | H(8)  | H(11) <sup>9</sup> | 2.941    |
| H(8)  | H(12) <sup>9</sup> | 3.016    | H(8)  | H(12) <sup>7</sup> | 3.478    |
| H(8)  | H(13) <sup>9</sup> | 3.104    | H(8)  | H(25) <sup>3</sup> | 3.071    |
| H(8)  | H(25) <sup>8</sup> | 3.148    | H(8)  | H(26) <sup>8</sup> | 2.588    |
| H(9)  | C(6) <sup>8</sup>  | 2.997    | H(9)  | C(7) <sup>8</sup>  | 3.145    |
| H(9)  | C(10) <sup>9</sup> | 3.361    | H(9)  | H(8) <sup>8</sup>  | 2.960    |
| H(9)  | H(9) <sup>8</sup>  | 3.078    | H(9)  | H(11) <sup>9</sup> | 3.233    |
| H(9)  | H(13) <sup>9</sup> | 2.698    | H(10) | C(1) <sup>10</sup> | 3.299    |
| H(10) | H(2) <sup>10</sup> | 2.778    | H(10) | H(3) <sup>10</sup> | 2.982    |
| H(10) | H(8) <sup>8</sup>  | 3.348    | H(11) | C(3) <sup>7</sup>  | 3.239    |
| H(11) | C(7) <sup>7</sup>  | 3.534    | H(11) | C(8) <sup>7</sup>  | 3.121    |
| H(11) | C(9) <sup>7</sup>  | 3.490    | H(11) | C(21) <sup>7</sup> | 3.593    |
| H(11) | H(8) <sup>5</sup>  | 2.941    | H(11) | H(9) <sup>5</sup>  | 3.233    |
| H(11) | H(24) <sup>7</sup> | 2.998    | H(11) | H(25) <sup>7</sup> | 3.216    |
| H(11) | H(26) <sup>7</sup> | 3.385    | H(12) | C(5) <sup>1</sup>  | 3.379    |

Table 10. Distances beyond the asymmetric unit out to 3.60 Å involving hydrogens (continued)

| atom  | atom                 | distance | atom  | atom                 | distance |
|-------|----------------------|----------|-------|----------------------|----------|
| H(12) | C(21) <sup>7)</sup>  | 3.313    | H(12) | H(7) <sup>1)</sup>   | 2.929    |
| H(12) | H(8) <sup>5)</sup>   | 3.016    | H(12) | H(8) <sup>1)</sup>   | 3.478    |
| H(12) | H(24) <sup>7)</sup>  | 3.398    | H(12) | H(25) <sup>2)</sup>  | 3.441    |
| H(12) | H(25) <sup>7)</sup>  | 2.580    | H(12) | H(26) <sup>7)</sup>  | 3.372    |
| H(12) | H(27) <sup>2)</sup>  | 3.588    | H(13) | C(7) <sup>5)</sup>   | 3.412    |
| H(13) | H(8) <sup>5)</sup>   | 3.104    | H(13) | H(9) <sup>5)</sup>   | 2.698    |
| H(13) | H(27) <sup>2)</sup>  | 3.350    | H(13) | H(30) <sup>3)</sup>  | 3.180    |
| H(14) | C(13) <sup>11)</sup> | 3.171    | H(14) | C(14) <sup>11)</sup> | 3.569    |
| H(14) | H(1) <sup>4)</sup>   | 3.237    | H(14) | H(5) <sup>4)</sup>   | 3.521    |
| H(14) | H(14) <sup>11)</sup> | 2.671    | H(14) | H(15) <sup>11)</sup> | 3.356    |
| H(14) | H(18) <sup>11)</sup> | 3.053    | H(15) | C(2) <sup>4)</sup>   | 3.106    |
| H(15) | C(14) <sup>11)</sup> | 3.126    | H(15) | H(4) <sup>4)</sup>   | 3.024    |
| H(15) | H(4) <sup>10)</sup>  | 3.221    | H(15) | H(5) <sup>4)</sup>   | 2.374    |
| H(15) | H(14) <sup>11)</sup> | 3.356    | H(15) | H(15) <sup>11)</sup> | 2.361    |
| H(15) | H(20) <sup>12)</sup> | 3.446    | H(15) | H(21) <sup>4)</sup>  | 3.056    |
| H(15) | H(23) <sup>12)</sup> | 3.534    | H(16) | C(18) <sup>12)</sup> | 3.157    |
| H(16) | H(4) <sup>10)</sup>  | 2.804    | H(16) | H(17) <sup>12)</sup> | 3.273    |
| H(16) | H(19) <sup>12)</sup> | 3.334    | H(16) | H(20) <sup>12)</sup> | 2.365    |
| H(16) | H(21) <sup>4)</sup>  | 3.328    | H(16) | H(23) <sup>12)</sup> | 3.259    |
| H(17) | H(16) <sup>3)</sup>  | 3.273    | H(17) | H(28) <sup>3)</sup>  | 2.893    |
| H(18) | C(19) <sup>11)</sup> | 3.369    | H(18) | H(1) <sup>10)</sup>  | 3.095    |
| H(18) | H(2) <sup>10)</sup>  | 3.300    | H(18) | H(14) <sup>11)</sup> | 3.053    |
| H(18) | H(18) <sup>11)</sup> | 3.155    | H(18) | H(22) <sup>11)</sup> | 2.517    |
| H(18) | H(23) <sup>11)</sup> | 3.517    | H(19) | C(1) <sup>10)</sup>  | 3.488    |
| H(19) | H(1) <sup>10)</sup>  | 3.245    | H(19) | H(2) <sup>10)</sup>  | 3.151    |
| H(19) | H(3) <sup>10)</sup>  | 3.507    | H(19) | H(4) <sup>9)</sup>   | 3.448    |
| H(19) | H(16) <sup>3)</sup>  | 3.334    | H(19) | H(28) <sup>3)</sup>  | 3.577    |
| H(20) | C(2) <sup>9)</sup>   | 3.478    | H(20) | C(15) <sup>3)</sup>  | 3.306    |
| H(20) | H(4) <sup>9)</sup>   | 2.706    | H(20) | H(6) <sup>9)</sup>   | 3.488    |
| H(20) | H(15) <sup>3)</sup>  | 3.446    | H(20) | H(16) <sup>3)</sup>  | 2.365    |
| H(20) | H(22) <sup>11)</sup> | 3.545    | H(20) | H(28) <sup>3)</sup>  | 3.496    |
| H(21) | C(14) <sup>4)</sup>  | 3.020    | H(21) | C(15) <sup>4)</sup>  | 3.148    |
| H(21) | H(15) <sup>4)</sup>  | 3.056    | H(21) | H(16) <sup>4)</sup>  | 3.328    |
| H(21) | H(23) <sup>6)</sup>  | 2.942    | H(22) | C(18) <sup>11)</sup> | 3.390    |
| H(22) | H(1) <sup>4)</sup>   | 3.323    | H(22) | H(18) <sup>11)</sup> | 2.517    |
| H(22) | H(20) <sup>11)</sup> | 3.545    | H(22) | H(29) <sup>4)</sup>  | 3.548    |
| H(23) | C(2) <sup>6)</sup>   | 3.571    | H(23) | C(19) <sup>6)</sup>  | 3.266    |

Table 10. Distances beyond the asymmetric unit out to 3.60 Å involving hydrogens (continued)

| atom  | atom                 | distance | atom  | atom                 | distance |
|-------|----------------------|----------|-------|----------------------|----------|
| H(23) | H(5) <sup>6)</sup>   | 3.155    | H(23) | H(6) <sup>6)</sup>   | 3.258    |
| H(23) | H(15) <sup>3)</sup>  | 3.534    | H(23) | H(16) <sup>3)</sup>  | 3.259    |
| H(23) | H(18) <sup>11)</sup> | 3.517    | H(23) | H(21) <sup>6)</sup>  | 2.942    |
| H(23) | H(23) <sup>6)</sup>  | 2.727    | H(24) | C(10) <sup>1)</sup>  | 3.570    |
| H(24) | H(7) <sup>1)</sup>   | 3.269    | H(24) | H(11) <sup>1)</sup>  | 2.998    |
| H(24) | H(12) <sup>1)</sup>  | 3.398    | H(25) | C(5) <sup>12)</sup>  | 3.482    |
| H(25) | C(6) <sup>12)</sup>  | 3.120    | H(25) | C(7) <sup>12)</sup>  | 3.482    |
| H(25) | C(10) <sup>1)</sup>  | 3.314    | H(25) | H(8) <sup>12)</sup>  | 3.071    |
| H(25) | H(8) <sup>8)</sup>   | 3.148    | H(25) | H(11) <sup>1)</sup>  | 3.216    |
| H(25) | H(12) <sup>10)</sup> | 3.441    | H(25) | H(12) <sup>1)</sup>  | 2.580    |
| H(26) | C(1) <sup>10)</sup>  | 3.420    | H(26) | C(6) <sup>8)</sup>   | 3.492    |
| H(26) | H(2) <sup>10)</sup>  | 2.899    | H(26) | H(3) <sup>10)</sup>  | 3.258    |
| H(26) | H(8) <sup>8)</sup>   | 2.588    | H(26) | H(11) <sup>1)</sup>  | 3.385    |
| H(26) | H(12) <sup>1)</sup>  | 3.372    | H(27) | O(1) <sup>10)</sup>  | 3.503    |
| H(27) | H(2) <sup>10)</sup>  | 3.329    | H(27) | H(4) <sup>10)</sup>  | 3.330    |
| H(27) | H(12) <sup>10)</sup> | 3.588    | H(27) | H(13) <sup>10)</sup> | 3.350    |
| H(28) | C(3) <sup>12)</sup>  | 3.514    | H(28) | C(8) <sup>12)</sup>  | 3.343    |
| H(28) | H(6) <sup>12)</sup>  | 2.823    | H(28) | H(17) <sup>12)</sup> | 2.893    |
| H(28) | H(19) <sup>12)</sup> | 3.577    | H(28) | H(20) <sup>12)</sup> | 3.496    |
| H(29) | C(2) <sup>12)</sup>  | 3.587    | H(29) | H(6) <sup>12)</sup>  | 2.650    |
| H(29) | H(22) <sup>4)</sup>  | 3.548    | H(30) | O(1) <sup>12)</sup>  | 3.542    |
| H(30) | C(3) <sup>12)</sup>  | 3.008    | H(30) | C(4) <sup>12)</sup>  | 2.998    |
| H(30) | C(5) <sup>12)</sup>  | 3.323    | H(30) | C(8) <sup>12)</sup>  | 3.357    |
| H(30) | C(10) <sup>12)</sup> | 3.579    | H(30) | H(6) <sup>12)</sup>  | 3.254    |
| H(30) | H(13) <sup>12)</sup> | 3.180    |       |                      |          |

Symmetry Operators:

(1)  $-X+1/2, Y+1/2, -Z+1/2+1$

(3)  $X, Y-1, Z$

(5)  $X, -Y, Z+1/2$

(7)  $-X+1/2, Y+1/2-1, -Z+1/2+1$

(9)  $X, -Y, Z+1/2-1$

(11)  $-X, Y, -Z+1/2$

(2)  $X, -Y+1, Z+1/2$

(4)  $-X, -Y+1, -Z+1$

(6)  $-X, -Y, -Z+1$

(8)  $-X+1/2, -Y+1/2, -Z+1$

(10)  $X, -Y+1, Z+1/2-1$

(12)  $X, Y+1, Z$

X-ray Structure Report for  $\text{Me}_2\text{A}[\text{O}-2\text{-Me}-6\text{-(}^t\text{BuN=CH)C}_6\text{H}_3]$  (**1b**)

February 20, 2007

## Experimental

### Data Collection

A colorless block crystal of  $C_{14}H_{22}NOAl$  having approximate dimensions of 0.46 x 0.44 x 0.34 mm was mounted on a glass fiber. All measurements were made on a Rigaku RAXIS RAPID imaging plate area detector with graphite monochromated Mo- $K\alpha$  radiation.

Indexing was performed from 3 oscillations that were exposed for 180 seconds. The crystal-to-detector distance was 127.40 mm.

Cell constants and an orientation matrix for data collection corresponded to a primitive monoclinic cell with dimensions:

$$\begin{aligned} a &= 9.7023(5) \text{ \AA} \\ b &= 9.7378(5) \text{ \AA} & \beta &= 92.9412(18)^\circ \\ c &= 15.6108(8) \text{ \AA} \\ V &= 1472.97(13) \text{ \AA}^3 \end{aligned}$$

For  $Z = 4$  and F.W. = 247.32, the calculated density is 1.115 g/cm<sup>3</sup>. The systematic absences of:

$$\begin{aligned} h0l: & l \pm 2n \\ 0k0: & k \pm 2n \end{aligned}$$

uniquely determine the space group to be:

$$P2_1/c \text{ (\#14)}$$

The data were collected at a temperature of  $-30 \pm 1^\circ\text{C}$  to a maximum  $2\theta$  value of  $54.9^\circ$ . A total of 44 oscillation images were collected. A sweep of data was done using  $\omega$  scans from  $130.0$  to  $190.0^\circ$  in  $5.0^\circ$  step, at  $\chi=45.0^\circ$  and  $\phi = 0.0^\circ$ . The exposure rate was 80.0 [sec./ $^\circ$ ]. A second sweep was performed using  $\omega$  scans from  $0.0$  to  $160.0^\circ$  in  $5.0^\circ$  step, at  $\chi=45.0^\circ$  and  $\phi = 180.0^\circ$ . The exposure rate was 80.0 [sec./ $^\circ$ ]. The crystal-to-detector distance was 127.40 mm. Readout was performed in the 0.100 mm pixel mode.

## Data Reduction

Of the 14044 reflections that were collected, 3354 were unique ( $R_{\text{int}} = 0.022$ ); equivalent reflections were merged.

The linear absorption coefficient,  $\mu$ , for Mo-K $\alpha$  radiation is 1.237 cm<sup>-1</sup>. An empirical absorption correction was applied which resulted in transmission factors ranging from 0.803 to 0.959. The data were corrected for Lorentz and polarization effects.

## Structure Solution and Refinement

The structure was solved by heavy-atom Patterson methods<sup>1</sup> and expanded using Fourier techniques<sup>2</sup>. The non-hydrogen atoms were refined anisotropically. Hydrogen atoms were refined using the riding model. The final cycle of full-matrix least-squares refinement<sup>3</sup> on  $F^2$  was based on 2752 observed reflections and 176 variable parameters and converged (largest parameter shift was 0.00 times its esd) with unweighted and weighted agreement factors of:

$$R1 = \sum ||F_o| - |F_c|| / \sum |F_o| = 0.0449$$

$$wR2 = [ \sum ( w (F_o^2 - F_c^2)^2 ) / \sum w(F_o^2)^2 ]^{1/2} = 0.1466$$

The standard deviation of an observation of unit weight<sup>4</sup> was 1.00. A Sheldrick weighting scheme was used. Plots of  $\sum w (|F_o| - |F_c|)^2$  versus  $|F_o|$ , reflection order in data collection,  $\sin \theta/\lambda$  and various classes of indices showed no unusual trends. The maximum and minimum peaks on the final difference Fourier map corresponded to 0.25 and -0.28 e<sup>-</sup>/Å<sup>3</sup>, respectively.

Neutral atom scattering factors were taken from Cromer and Waber<sup>5</sup>. Anomalous dispersion effects were included in  $F_{\text{calc}}$ <sup>6</sup>; the values for  $\Delta f'$  and  $\Delta f''$  were those of Creagh and McAuley<sup>7</sup>. The values for the mass attenuation coefficients are those of Creagh and Hubbell<sup>8</sup>. All calculations were performed using the CrystalStructure<sup>9,10</sup> crystallographic software package.



## References

(1) PATTY: Beurskens, P.T., Admiraal, G., Beurskens, G., Bosman, W.P., Garcia-Granda, S., Gould, R.O., Smits, J.M.M. and Smykalla, C. (1992). The DIRDIF program system, Technical Report of the Crystallography Laboratory, University of Nijmegen, The Netherlands.

(2) DIRDIF99: Beurskens, P.T., Admiraal, G., Beurskens, G., Bosman, W.P., de Gelder, R., Israel, R. and Smits, J.M.M.(1999). The DIRDIF-99 program system, Technical Report of the Crystallography Laboratory, University of Nijmegen, The Netherlands.

(3) Least Squares function minimized:

$$\sum w(F_o^2 - F_c^2)^2 \quad \text{where } w = \text{Least Squares weights.}$$

(4) Standard deviation of an observation of unit weight:

$$[\sum w(F_o^2 - F_c^2)^2 / (N_o - N_v)]^{1/2}$$

where:  $N_o$  = number of observations  
 $N_v$  = number of variables

(5) Cromer, D. T. & Waber, J. T.; "International Tables for X-ray Crystallography", Vol. IV, The Kynoch Press, Birmingham, England, Table 2.2 A (1974).

(6) Ibers, J. A. & Hamilton, W. C.; Acta Crystallogr., 17, 781 (1964).

(7) Creagh, D. C. & McAuley, W.J. ; "International Tables for Crystallography", Vol C, (A.J.C. Wilson, ed.), Kluwer Academic Publishers, Boston, Table 4.2.6.8, pages 219-222 (1992).

(8) Creagh, D. C. & Hubbell, J.H.; "International Tables for Crystallography", Vol C, (A.J.C. Wilson, ed.), Kluwer Academic Publishers, Boston, Table 4.2.4.3, pages 200-206 (1992).

(9) CrystalStructure 3.8: Crystal Structure Analysis Package, Rigaku and Rigaku/MSO (2000-2006). 9009 New Trails Dr. The Woodlands TX 77381 USA.

(10) CRYSTALS Issue 11: Carruthers, J.R., Rollett, J.S., Betteridge, P.W., Kinna, D., Pearce, L., Larsen, A., and Gabe, E. Chemical Crystallography Laboratory, Oxford, UK. (1999)

## EXPERIMENTAL DETAILS

### A. Crystal Data

|                      |                                                                                                               |
|----------------------|---------------------------------------------------------------------------------------------------------------|
| Empirical Formula    | C <sub>14</sub> H <sub>22</sub> NOAI                                                                          |
| Formula Weight       | 247.32                                                                                                        |
| Crystal Color, Habit | colorless, block                                                                                              |
| Crystal Dimensions   | 0.46 X 0.44 X 0.34 mm                                                                                         |
| Crystal System       | monoclinic                                                                                                    |
| Lattice Type         | Primitive                                                                                                     |
| Indexing Images      | 3 oscillations @ 180.0 seconds                                                                                |
| Detector Position    | 127.40 mm                                                                                                     |
| Pixel Size           | 0.100 mm                                                                                                      |
| Lattice Parameters   | a = 9.7023(5) Å<br>b = 9.7378(5) Å<br>c = 15.6108(8) Å<br>β = 92.9412(18) °<br>V = 1472.97(13) Å <sup>3</sup> |
| Space Group          | P2 <sub>1</sub> /c (#14)                                                                                      |
| Z value              | 4                                                                                                             |
| D <sub>calc</sub>    | 1.115 g/cm <sup>3</sup>                                                                                       |
| F <sub>000</sub>     | 536.00                                                                                                        |
| μ(MoKα)              | 1.237 cm <sup>-1</sup>                                                                                        |

## B. Intensity Measurements

|                                                           |                                                                            |
|-----------------------------------------------------------|----------------------------------------------------------------------------|
| Diffractometer                                            | Rigaku RAXIS-RAPID                                                         |
| Radiation                                                 | MoK $\alpha$ ( $\lambda = 0.71075 \text{ \AA}$ )<br>graphite monochromated |
| Detector Aperture                                         | 280 mm x 256 mm                                                            |
| Data Images                                               | 44 exposures                                                               |
| $\omega$ oscillation Range ( $\chi=45.0$ , $\phi=0.0$ )   | 130.0 - 190.0 $^\circ$                                                     |
| Exposure Rate                                             | 80.0 sec./ $^\circ$                                                        |
| $\omega$ oscillation Range ( $\chi=45.0$ , $\phi=180.0$ ) | 0.0 - 160.0 $^\circ$                                                       |
| Exposure Rate                                             | 80.0 sec./ $^\circ$                                                        |
| Detector Position                                         | 127.40 mm                                                                  |
| Pixel Size                                                | 0.100 mm                                                                   |
| $2\theta_{\max}$                                          | 54.9 $^\circ$                                                              |
| No. of Reflections Measured                               | Total: 14044<br>Unique: 3354 ( $R_{\text{int}} = 0.022$ )                  |
| Corrections                                               | Lorentz-polarization<br>Absorption<br>(trans. factors: 0.803 - 0.959)      |

### C. Structure Solution and Refinement

|                                          |                                                |
|------------------------------------------|------------------------------------------------|
| Structure Solution                       | Patterson Methods (DIRDIF99 PATTY)             |
| Refinement                               | Full-matrix least-squares on $F^2$             |
| Function Minimized                       | $\sum w (F_o^2 - F_c^2)^2$                     |
| Least Squares Weights                    | $1/[0.0042F_o^2+1.0000\sigma(F_o^2)]/(4F_o^2)$ |
| $2\theta_{\max}$ cutoff                  | 54.9 $^\circ$                                  |
| Anomalous Dispersion                     | All non-hydrogen atoms                         |
| No. Observations ( $I > 2.00\sigma(I)$ ) | 2752                                           |
| No. Variables                            | 176                                            |
| Reflection/Parameter Ratio               | 15.64                                          |
| Residuals: R1 ( $I > 2.00\sigma(I)$ )    | 0.0449                                         |
| Residuals: wR2 ( $I > 2.00\sigma(I)$ )   | 0.1466                                         |
| Goodness of Fit Indicator                | 1.001                                          |
| Max Shift/Error in Final Cycle           | 0.000                                          |
| Maximum peak in Final Diff. Map          | 0.25 e $^-/\text{\AA}^3$                       |
| Minimum peak in Final Diff. Map          | -0.28 e $^-/\text{\AA}^3$                      |

Table 1. Atomic coordinates and  $B_{iso}/B_{eq}$

| atom  | x            | y           | z           | $B_{eq}$  |
|-------|--------------|-------------|-------------|-----------|
| Al(1) | 0.19308(4)   | 0.24440(4)  | 0.39644(3)  | 3.140(11) |
| O(1)  | 0.26868(12)  | 0.40991(11) | 0.40758(7)  | 4.03(2)   |
| N(1)  | 0.20434(12)  | 0.23435(12) | 0.27033(8)  | 3.01(2)   |
| C(1)  | 0.3129(2)    | 0.10977(19) | 0.45678(12) | 4.78(3)   |
| C(2)  | -0.00116(19) | 0.2485(2)   | 0.42611(13) | 4.57(4)   |
| C(3)  | 0.31002(13)  | 0.49787(15) | 0.34983(8)  | 3.00(2)   |
| C(4)  | 0.35832(14)  | 0.62892(15) | 0.37692(10) | 3.40(2)   |
| C(5)  | 0.39963(15)  | 0.72081(15) | 0.31631(13) | 3.94(3)   |
| C(6)  | 0.39603(18)  | 0.68937(17) | 0.22891(12) | 4.34(3)   |
| C(7)  | 0.34932(17)  | 0.56287(16) | 0.20238(10) | 3.87(3)   |
| C(8)  | 0.30553(14)  | 0.46506(14) | 0.26154(9)  | 3.10(2)   |
| C(9)  | 0.25307(15)  | 0.33628(15) | 0.22820(9)  | 3.19(2)   |
| C(10) | 0.15219(15)  | 0.11190(15) | 0.21840(10) | 3.53(2)   |
| C(11) | 0.0233(2)    | 0.1540(2)   | 0.16589(17) | 6.13(5)   |
| C(12) | 0.2626(2)    | 0.0585(2)   | 0.16237(16) | 6.28(5)   |
| C(13) | 0.1122(2)    | -0.0015(2)  | 0.27989(14) | 5.83(4)   |
| C(14) | 0.36057(19)  | 0.66316(18) | 0.47170(11) | 4.66(3)   |

$$B_{eq} = 8/3 \pi^2 (U_{11}(aa^*)^2 + U_{22}(bb^*)^2 + U_{33}(cc^*)^2 + 2U_{12}(aa^*bb^*)\cos \gamma + 2U_{13}(aa^*cc^*)\cos \beta + 2U_{23}(bb^*cc^*)\cos \alpha)$$

Table 2. Atomic coordinates and  $B_{iso}$  involving hydrogens/ $B_{eq}$

| atom  | x       | y       | z      | $B_{eq}$ |
|-------|---------|---------|--------|----------|
| H(1)  | 0.3477  | 0.1481  | 0.5095 | 5.75     |
| H(2)  | 0.2618  | 0.0290  | 0.4678 | 5.78     |
| H(3)  | 0.3876  | 0.0874  | 0.4223 | 5.75     |
| H(4)  | -0.0169 | 0.3280  | 0.4595 | 5.55     |
| H(5)  | -0.0587 | 0.2513  | 0.3750 | 5.53     |
| H(6)  | -0.0218 | 0.1688  | 0.4581 | 5.51     |
| H(7)  | 0.4328  | 0.8138  | 0.3352 | 4.72     |
| H(8)  | 0.4399  | 0.7566  | 0.1889 | 5.23     |
| H(9)  | 0.3478  | 0.5388  | 0.1434 | 4.66     |
| H(10) | 0.2606  | 0.3242  | 0.1660 | 3.85     |
| H(11) | -0.0115 | 0.0778  | 0.1335 | 7.23     |
| H(12) | -0.0449 | 0.1853  | 0.2028 | 7.29     |
| H(13) | 0.0463  | 0.2259  | 0.1281 | 7.26     |
| H(14) | 0.3428  | 0.0415  | 0.1982 | 7.65     |
| H(15) | 0.2332  | -0.0244 | 0.1351 | 7.65     |
| H(16) | 0.2831  | 0.1246  | 0.1201 | 7.62     |
| H(17) | 0.0676  | -0.0740 | 0.2486 | 6.99     |
| H(18) | 0.1925  | -0.0358 | 0.3100 | 7.02     |
| H(19) | 0.0510  | 0.0353  | 0.3196 | 6.99     |
| H(20) | 0.3844  | 0.7571  | 0.4795 | 5.68     |
| H(21) | 0.2724  | 0.6468  | 0.4934 | 5.62     |
| H(22) | 0.4274  | 0.6073  | 0.5016 | 5.62     |

$$B_{eq} = 8/3 \pi^2 (U_{11}(aa^*)^2 + U_{22}(bb^*)^2 + U_{33}(cc^*)^2 + 2U_{12}(aa^*bb^*)\cos \gamma + 2U_{13}(aa^*cc^*)\cos \beta + 2U_{23}(bb^*cc^*)\cos \alpha)$$

Table 3. Anisotropic displacement parameters

| atom  | U <sub>11</sub>          | U <sub>22</sub> | U <sub>33</sub> | U <sub>12</sub> | U <sub>13</sub> | U <sub>23</sub> |
|-------|--------------------------|-----------------|-----------------|-----------------|-----------------|-----------------|
| Al(1) | 0.0406(2)<br>0.00318(16) | 0.0381(2)       | 0.0406(2)       | -0.00158(16)    | 0.0027(2)       |                 |
| O(1)  | 0.0670(7)                | 0.0433(5)       | 0.0430(5)       | -0.0117(5)      | 0.0059(4)       | -0.0019(4)      |
| N(1)  | 0.0355(5)                | 0.0351(5)       | 0.0437(6)       | -0.0021(4)      | 0.0026(4)       | -0.0038(4)      |
| C(1)  | 0.0610(9)                | 0.0559(9)       | 0.0638(10)      | 0.0037(8)       | -0.0072(8)      | 0.0101(8)       |
| C(2)  | 0.0486(8)                | 0.0697(11)      | 0.0563(10)      | 0.0016(7)       | 0.0120(7)       | 0.0031(7)       |
| C(3)  | 0.0316(6)                | 0.0362(6)       | 0.0463(7)       | 0.0012(4)       | 0.0029(5)       | -0.0018(5)      |
| C(4)  | 0.0316(6)                | 0.0383(6)       | 0.0591(8)       | 0.0030(5)       | 0.0026(5)       | -0.0076(6)      |
| C(5)  | 0.0399(7)                | 0.0338(6)       | 0.0761(10)      | -0.0017(5)      | 0.0057(7)       | -0.0029(7)      |
| C(6)  | 0.0532(8)                | 0.0430(8)       | 0.0694(10)      | -0.0052(7)      | 0.0088(7)       | 0.0100(7)       |
| C(7)  | 0.0505(8)                | 0.0456(8)       | 0.0514(8)       | -0.0032(6)      | 0.0069(6)       | 0.0054(6)       |
| C(8)  | 0.0352(6)                | 0.0360(6)       | 0.0468(7)       | 0.0006(5)       | 0.0034(5)       | 0.0010(5)       |
| C(9)  | 0.0398(6)                | 0.0410(7)       | 0.0405(6)       | 0.0000(5)       | 0.0035(5)       | -0.0017(5)      |
| C(10) | 0.0433(7)                | 0.0398(7)       | 0.0511(7)       | -0.0071(6)      | 0.0022(6)       | -0.0080(6)      |
| C(11) | 0.0744(13)               | 0.0597(11)      | 0.0953(14)      | -0.0055(9)      | -0.0309(11)     | -0.0166(10)     |
| C(12) | 0.0721(12)               | 0.0606(11)      | 0.1087(17)      | -0.0200(9)      | 0.0336(12)      | -0.0403(11)     |
| C(13) | 0.0971(15)               | 0.0483(9)       | 0.0763(11)      | -0.0246(10)     | 0.0073(10)      | -0.0057(8)      |
| C(14) | 0.0615(10)               | 0.0499(9)       | 0.0657(10)      | -0.0067(7)      | 0.0046(8)       | -0.0188(7)      |

The general temperature factor expression:  $\exp(-2\pi^2(a^2U_{11}h^2 + b^2U_{22}k^2 + c^2U_{33}l^2 + 2a*b*U_{12}hk + 2a*c*U_{13}hl + 2b*c*U_{23}kl))$

Table 4. Bond lengths (Å)

| atom  | atom  | distance   | atom  | atom  | distance   |
|-------|-------|------------|-------|-------|------------|
| Al(1) | O(1)  | 1.7756(11) | Al(1) | N(1)  | 1.9797(13) |
| Al(1) | C(1)  | 1.9607(19) | Al(1) | C(2)  | 1.9640(19) |
| O(1)  | C(3)  | 1.3208(17) | N(1)  | C(9)  | 1.2935(18) |
| N(1)  | C(10) | 1.5142(18) | C(3)  | C(4)  | 1.417(2)   |
| C(3)  | C(8)  | 1.4133(18) | C(4)  | C(5)  | 1.377(2)   |
| C(4)  | C(14) | 1.516(2)   | C(5)  | C(6)  | 1.397(2)   |
| C(6)  | C(7)  | 1.369(2)   | C(7)  | C(8)  | 1.407(2)   |
| C(8)  | C(9)  | 1.4406(19) | C(10) | C(11) | 1.516(2)   |
| C(10) | C(12) | 1.509(2)   | C(10) | C(13) | 1.526(2)   |



Table 5. Bond lengths involving hydrogens (Å)

| atom  | atom  | distance | atom  | atom  | distance |
|-------|-------|----------|-------|-------|----------|
| C(1)  | H(1)  | 0.950    | C(1)  | H(2)  | 0.950    |
| C(1)  | H(3)  | 0.950    | C(2)  | H(4)  | 0.950    |
| C(2)  | H(5)  | 0.950    | C(2)  | H(6)  | 0.950    |
| C(5)  | H(7)  | 1.000    | C(6)  | H(8)  | 1.014    |
| C(7)  | H(9)  | 0.949    | C(9)  | H(10) | 0.985    |
| C(11) | H(11) | 0.950    | C(11) | H(12) | 0.950    |
| C(11) | H(13) | 0.950    | C(12) | H(14) | 0.950    |
| C(12) | H(15) | 0.950    | C(12) | H(16) | 0.950    |
| C(13) | H(17) | 0.950    | C(13) | H(18) | 0.950    |
| C(13) | H(19) | 0.950    | C(14) | H(20) | 0.950    |
| C(14) | H(21) | 0.950    | C(14) | H(22) | 0.950    |

Table 6. Bond angles (°)

| atom  | atom  | atom  | angle      | atom  | atom  | atom  | angle      |
|-------|-------|-------|------------|-------|-------|-------|------------|
| O(1)  | Al(1) | N(1)  | 95.66(5)   | O(1)  | Al(1) | C(1)  | 109.16(6)  |
| O(1)  | Al(1) | C(2)  | 110.79(7)  | N(1)  | Al(1) | C(1)  | 112.53(6)  |
| N(1)  | Al(1) | C(2)  | 109.76(6)  | C(1)  | Al(1) | C(2)  | 116.91(8)  |
| Al(1) | O(1)  | C(3)  | 131.32(9)  | Al(1) | N(1)  | C(9)  | 120.53(9)  |
| Al(1) | N(1)  | C(10) | 122.50(9)  | C(9)  | N(1)  | C(10) | 116.93(12) |
| O(1)  | C(3)  | C(4)  | 119.20(12) | O(1)  | C(3)  | C(8)  | 121.59(12) |
| C(4)  | C(3)  | C(8)  | 119.21(12) | C(3)  | C(4)  | C(5)  | 118.94(14) |
| C(3)  | C(4)  | C(14) | 118.53(13) | C(5)  | C(4)  | C(14) | 122.53(14) |
| C(4)  | C(5)  | C(6)  | 122.36(14) | C(5)  | C(6)  | C(7)  | 118.94(15) |
| C(6)  | C(7)  | C(8)  | 121.11(14) | C(3)  | C(8)  | C(7)  | 119.45(12) |
| C(3)  | C(8)  | C(9)  | 122.80(12) | C(7)  | C(8)  | C(9)  | 117.71(12) |
| N(1)  | C(9)  | C(8)  | 128.01(13) | N(1)  | C(10) | C(11) | 108.69(13) |
| N(1)  | C(10) | C(12) | 110.71(13) | N(1)  | C(10) | C(13) | 108.77(13) |
| C(11) | C(10) | C(12) | 111.70(16) | C(11) | C(10) | C(13) | 107.83(15) |
| C(12) | C(10) | C(13) | 109.05(14) |       |       |       |            |

Table 7. Bond angles involving hydrogens (°)

| atom  | atom  | atom  | angle | atom  | atom  | atom  | angle |
|-------|-------|-------|-------|-------|-------|-------|-------|
| Al(1) | C(1)  | H(1)  | 109.2 | Al(1) | C(1)  | H(2)  | 109.8 |
| Al(1) | C(1)  | H(3)  | 109.4 | H(1)  | C(1)  | H(2)  | 109.5 |
| H(1)  | C(1)  | H(3)  | 109.5 | H(2)  | C(1)  | H(3)  | 109.5 |
| Al(1) | C(2)  | H(4)  | 109.2 | Al(1) | C(2)  | H(5)  | 109.4 |
| Al(1) | C(2)  | H(6)  | 109.8 | H(4)  | C(2)  | H(5)  | 109.5 |
| H(4)  | C(2)  | H(6)  | 109.5 | H(5)  | C(2)  | H(6)  | 109.5 |
| C(4)  | C(5)  | H(7)  | 119.1 | C(6)  | C(5)  | H(7)  | 118.5 |
| C(5)  | C(6)  | H(8)  | 118.0 | C(7)  | C(6)  | H(8)  | 122.5 |
| C(6)  | C(7)  | H(9)  | 120.3 | C(8)  | C(7)  | H(9)  | 118.6 |
| N(1)  | C(9)  | H(10) | 117.2 | C(8)  | C(9)  | H(10) | 114.7 |
| C(10) | C(11) | H(11) | 109.8 | C(10) | C(11) | H(12) | 109.9 |
| C(10) | C(11) | H(13) | 108.8 | H(11) | C(11) | H(12) | 109.5 |
| H(11) | C(11) | H(13) | 109.5 | H(12) | C(11) | H(13) | 109.5 |
| C(10) | C(12) | H(14) | 107.7 | C(10) | C(12) | H(15) | 110.3 |
| C(10) | C(12) | H(16) | 110.5 | H(14) | C(12) | H(15) | 109.5 |
| H(14) | C(12) | H(16) | 109.5 | H(15) | C(12) | H(16) | 109.5 |
| C(10) | C(13) | H(17) | 109.8 | C(10) | C(13) | H(18) | 109.7 |
| C(10) | C(13) | H(19) | 109.0 | H(17) | C(13) | H(18) | 109.5 |
| H(17) | C(13) | H(19) | 109.5 | H(18) | C(13) | H(19) | 109.5 |
| C(4)  | C(14) | H(20) | 109.2 | C(4)  | C(14) | H(21) | 110.1 |
| C(4)  | C(14) | H(22) | 109.2 | H(20) | C(14) | H(21) | 109.5 |
| H(20) | C(14) | H(22) | 109.5 | H(21) | C(14) | H(22) | 109.5 |

Table 8. Torsion Angles(°)

| atom1 | atom2 | atom3 | atom4 | angle       | atom1 | atom2 | atom3 | atom4 | angle       |
|-------|-------|-------|-------|-------------|-------|-------|-------|-------|-------------|
| O(1)  | Al(1) | N(1)  | C(9)  | -1.81(11)   | O(1)  | Al(1) | N(1)  | C(10) | -179.32(10) |
| N(1)  | Al(1) | O(1)  | C(3)  | 3.48(13)    | C(1)  | Al(1) | O(1)  | C(3)  | 119.71(13)  |
| C(2)  | Al(1) | O(1)  | C(3)  | -110.17(13) | C(1)  | Al(1) | N(1)  | C(9)  | -115.27(12) |
| C(1)  | Al(1) | N(1)  | C(10) | 67.22(12)   | C(2)  | Al(1) | N(1)  | C(9)  | 112.68(12)  |
| C(2)  | Al(1) | N(1)  | C(10) | -64.83(12)  | Al(1) | O(1)  | C(3)  | C(4)  | 175.41(10)  |
| Al(1) | O(1)  | C(3)  | C(8)  | -3.7(2)     | Al(1) | N(1)  | C(9)  | C(8)  | 0.7(2)      |
| Al(1) | N(1)  | C(10) | C(11) | 109.46(14)  | Al(1) | N(1)  | C(10) | C(12) | -127.50(13) |
| Al(1) | N(1)  | C(10) | C(13) | -7.70(16)   | C(9)  | N(1)  | C(10) | C(11) | -68.14(18)  |
| C(9)  | N(1)  | C(10) | C(12) | 54.91(17)   | C(9)  | N(1)  | C(10) | C(13) | 174.71(14)  |
| C(10) | N(1)  | C(9)  | C(8)  | 178.35(13)  | O(1)  | C(3)  | C(4)  | C(5)  | -179.18(12) |
| O(1)  | C(3)  | C(4)  | C(14) | -0.03(15)   | O(1)  | C(3)  | C(8)  | C(7)  | 179.30(13)  |
| O(1)  | C(3)  | C(8)  | C(9)  | 1.6(2)      | C(4)  | C(3)  | C(8)  | C(7)  | 0.14(19)    |
| C(4)  | C(3)  | C(8)  | C(9)  | -177.60(12) | C(8)  | C(3)  | C(4)  | C(5)  | -0.01(17)   |
| C(8)  | C(3)  | C(4)  | C(14) | 179.15(13)  | C(3)  | C(4)  | C(5)  | C(6)  | -0.2(2)     |
| C(14) | C(4)  | C(5)  | C(6)  | -179.31(14) | C(4)  | C(5)  | C(6)  | C(7)  | 0.2(2)      |
| C(5)  | C(6)  | C(7)  | C(8)  | -0.1(2)     | C(6)  | C(7)  | C(8)  | C(3)  | -0.1(2)     |
| C(6)  | C(7)  | C(8)  | C(9)  | 177.77(14)  | C(3)  | C(8)  | C(9)  | N(1)  | -0.2(2)     |
| C(7)  | C(8)  | C(9)  | N(1)  | -177.99(14) |       |       |       |       |             |

The sign is positive if when looking from atom 2 to atom 3 a clock-wise motion of atom 1 would superimpose it on atom 4.

Table 9. Distances beyond the asymmetric unit out to 3.60 Å

| atom | atom                | distance | atom  | atom               | distance |
|------|---------------------|----------|-------|--------------------|----------|
| C(3) | C(11) <sup>1)</sup> | 3.571(2) | C(11) | C(3) <sup>2)</sup> | 3.571(2) |

Symmetry Operators:

(1)  $-X, Y+1/2, -Z+1/2$

(2)  $-X, Y+1/2-1, -Z+1/2$

Table 10. Distances beyond the asymmetric unit out to 3.60 Å involving hydrogens

| atom  | atom                 | distance | atom  | atom                 | distance |
|-------|----------------------|----------|-------|----------------------|----------|
| O(1)  | H(8) <sup>1)</sup>   | 3.595    | O(1)  | H(11) <sup>2)</sup>  | 3.024    |
| O(1)  | H(16) <sup>3)</sup>  | 3.330    | O(1)  | H(22) <sup>4)</sup>  | 3.210    |
| N(1)  | H(8) <sup>1)</sup>   | 3.484    | N(1)  | H(17) <sup>2)</sup>  | 3.233    |
| C(1)  | H(9) <sup>3)</sup>   | 3.255    | C(1)  | H(10) <sup>3)</sup>  | 3.392    |
| C(1)  | H(20) <sup>5)</sup>  | 3.518    | C(1)  | H(20) <sup>4)</sup>  | 3.316    |
| C(2)  | H(11) <sup>2)</sup>  | 3.343    | C(2)  | H(13) <sup>3)</sup>  | 3.172    |
| C(2)  | H(15) <sup>2)</sup>  | 3.263    | C(2)  | H(17) <sup>2)</sup>  | 3.265    |
| C(2)  | H(21) <sup>6)</sup>  | 3.143    | C(3)  | H(8) <sup>1)</sup>   | 3.453    |
| C(3)  | H(11) <sup>2)</sup>  | 3.023    | C(3)  | H(12) <sup>2)</sup>  | 3.226    |
| C(3)  | H(14) <sup>7)</sup>  | 3.514    | C(3)  | H(22) <sup>4)</sup>  | 3.509    |
| C(4)  | H(11) <sup>2)</sup>  | 3.397    | C(4)  | H(12) <sup>2)</sup>  | 3.272    |
| C(4)  | H(14) <sup>7)</sup>  | 3.295    | C(4)  | H(16) <sup>7)</sup>  | 3.477    |
| C(4)  | H(22) <sup>4)</sup>  | 3.579    | C(5)  | H(10) <sup>7)</sup>  | 3.444    |
| C(5)  | H(12) <sup>2)</sup>  | 3.457    | C(5)  | H(14) <sup>7)</sup>  | 3.066    |
| C(5)  | H(16) <sup>7)</sup>  | 3.320    | C(5)  | H(18) <sup>8)</sup>  | 3.106    |
| C(6)  | H(3) <sup>7)</sup>   | 3.388    | C(6)  | H(14) <sup>8)</sup>  | 3.497    |
| C(6)  | H(14) <sup>7)</sup>  | 3.081    | C(6)  | H(15) <sup>8)</sup>  | 3.489    |
| C(6)  | H(18) <sup>8)</sup>  | 3.595    | C(7)  | H(3) <sup>7)</sup>   | 3.297    |
| C(7)  | H(5) <sup>2)</sup>   | 3.525    | C(7)  | H(7) <sup>1)</sup>   | 3.290    |
| C(7)  | H(12) <sup>2)</sup>  | 3.575    | C(7)  | H(14) <sup>7)</sup>  | 3.301    |
| C(8)  | H(7) <sup>1)</sup>   | 3.359    | C(8)  | H(8) <sup>1)</sup>   | 3.259    |
| C(8)  | H(11) <sup>2)</sup>  | 3.536    | C(8)  | H(12) <sup>2)</sup>  | 3.383    |
| C(8)  | H(14) <sup>7)</sup>  | 3.517    | C(9)  | H(1) <sup>9)</sup>   | 3.584    |
| C(9)  | H(7) <sup>1)</sup>   | 3.259    | C(9)  | H(8) <sup>1)</sup>   | 3.279    |
| C(9)  | H(17) <sup>2)</sup>  | 3.270    | C(9)  | H(19) <sup>2)</sup>  | 3.577    |
| C(11) | H(4) <sup>9)</sup>   | 3.230    | C(11) | H(17) <sup>2)</sup>  | 3.114    |
| C(12) | H(8) <sup>5)</sup>   | 3.421    | C(12) | H(21) <sup>9)</sup>  | 3.315    |
| C(12) | H(22) <sup>9)</sup>  | 3.447    | C(13) | H(5) <sup>10)</sup>  | 3.433    |
| C(13) | H(12) <sup>10)</sup> | 3.133    | C(13) | H(13) <sup>10)</sup> | 3.421    |
| C(14) | H(1) <sup>4)</sup>   | 3.375    | C(14) | H(4) <sup>6)</sup>   | 3.556    |
| C(14) | H(8) <sup>11)</sup>  | 3.526    | C(14) | H(15) <sup>3)</sup>  | 3.192    |
| C(14) | H(22) <sup>4)</sup>  | 3.355    | H(1)  | C(9) <sup>3)</sup>   | 3.584    |
| H(1)  | C(14) <sup>4)</sup>  | 3.375    | H(1)  | H(3) <sup>12)</sup>  | 3.565    |
| H(1)  | H(7) <sup>4)</sup>   | 3.166    | H(1)  | H(9) <sup>3)</sup>   | 2.772    |
| H(1)  | H(10) <sup>3)</sup>  | 2.639    | H(1)  | H(16) <sup>3)</sup>  | 2.895    |
| H(1)  | H(20) <sup>4)</sup>  | 2.756    | H(1)  | H(22) <sup>4)</sup>  | 3.241    |
| H(2)  | H(6) <sup>13)</sup>  | 3.278    | H(2)  | H(7) <sup>5)</sup>   | 3.434    |

Table 10. Distances beyond the asymmetric unit out to 3.60 Å involving hydrogens (continued)

| atom  | atom                 | distance | atom  | atom                 | distance |
|-------|----------------------|----------|-------|----------------------|----------|
| H(2)  | H(9) <sup>3)</sup>   | 2.900    | H(2)  | H(10) <sup>3)</sup>  | 3.408    |
| H(2)  | H(20) <sup>5)</sup>  | 2.905    | H(3)  | C(6) <sup>1)</sup>   | 3.388    |
| H(3)  | C(7) <sup>1)</sup>   | 3.297    | H(3)  | H(1) <sup>12)</sup>  | 3.565    |
| H(3)  | H(7) <sup>5)</sup>   | 3.034    | H(3)  | H(8) <sup>1)</sup>   | 2.972    |
| H(3)  | H(9) <sup>1)</sup>   | 2.853    | H(3)  | H(20) <sup>5)</sup>  | 3.338    |
| H(3)  | H(20) <sup>4)</sup>  | 3.032    | H(4)  | C(11) <sup>3)</sup>  | 3.230    |
| H(4)  | C(14) <sup>6)</sup>  | 3.556    | H(4)  | H(4) <sup>6)</sup>   | 3.589    |
| H(4)  | H(11) <sup>2)</sup>  | 2.853    | H(4)  | H(11) <sup>3)</sup>  | 2.865    |
| H(4)  | H(13) <sup>3)</sup>  | 2.722    | H(4)  | H(15) <sup>2)</sup>  | 2.886    |
| H(4)  | H(17) <sup>2)</sup>  | 3.397    | H(4)  | H(21) <sup>6)</sup>  | 2.633    |
| H(5)  | C(7) <sup>10)</sup>  | 3.525    | H(5)  | C(13) <sup>2)</sup>  | 3.433    |
| H(5)  | H(9) <sup>10)</sup>  | 3.485    | H(5)  | H(11) <sup>2)</sup>  | 3.256    |
| H(5)  | H(15) <sup>2)</sup>  | 2.763    | H(5)  | H(17) <sup>2)</sup>  | 2.571    |
| H(5)  | H(21) <sup>6)</sup>  | 3.153    | H(6)  | H(2) <sup>13)</sup>  | 3.278    |
| H(6)  | H(6) <sup>13)</sup>  | 3.556    | H(6)  | H(13) <sup>3)</sup>  | 2.889    |
| H(6)  | H(21) <sup>6)</sup>  | 3.146    | H(7)  | C(7) <sup>7)</sup>   | 3.290    |
| H(7)  | C(8) <sup>7)</sup>   | 3.359    | H(7)  | C(9) <sup>7)</sup>   | 3.259    |
| H(7)  | H(1) <sup>4)</sup>   | 3.166    | H(7)  | H(2) <sup>8)</sup>   | 3.434    |
| H(7)  | H(3) <sup>8)</sup>   | 3.034    | H(7)  | H(9) <sup>7)</sup>   | 3.061    |
| H(7)  | H(10) <sup>7)</sup>  | 2.977    | H(7)  | H(14) <sup>8)</sup>  | 3.171    |
| H(7)  | H(14) <sup>7)</sup>  | 3.487    | H(7)  | H(16) <sup>7)</sup>  | 3.359    |
| H(7)  | H(18) <sup>8)</sup>  | 2.765    | H(8)  | O(1) <sup>7)</sup>   | 3.595    |
| H(8)  | N(1) <sup>7)</sup>   | 3.484    | H(8)  | C(3) <sup>7)</sup>   | 3.453    |
| H(8)  | C(8) <sup>7)</sup>   | 3.259    | H(8)  | C(9) <sup>7)</sup>   | 3.279    |
| H(8)  | C(12) <sup>8)</sup>  | 3.421    | H(8)  | C(14) <sup>14)</sup> | 3.526    |
| H(8)  | H(3) <sup>7)</sup>   | 2.972    | H(8)  | H(14) <sup>8)</sup>  | 2.935    |
| H(8)  | H(14) <sup>7)</sup>  | 3.399    | H(8)  | H(15) <sup>8)</sup>  | 3.017    |
| H(8)  | H(20) <sup>14)</sup> | 3.288    | H(8)  | H(21) <sup>14)</sup> | 3.512    |
| H(8)  | H(22) <sup>14)</sup> | 3.208    | H(9)  | C(1) <sup>9)</sup>   | 3.255    |
| H(9)  | H(1) <sup>9)</sup>   | 2.772    | H(9)  | H(2) <sup>9)</sup>   | 2.900    |
| H(9)  | H(3) <sup>7)</sup>   | 2.853    | H(9)  | H(5) <sup>2)</sup>   | 3.485    |
| H(9)  | H(7) <sup>1)</sup>   | 3.061    | H(9)  | H(20) <sup>14)</sup> | 3.273    |
| H(10) | C(1) <sup>9)</sup>   | 3.392    | H(10) | C(5) <sup>1)</sup>   | 3.444    |
| H(10) | H(1) <sup>9)</sup>   | 2.639    | H(10) | H(2) <sup>9)</sup>   | 3.408    |
| H(10) | H(7) <sup>1)</sup>   | 2.977    | H(11) | O(1) <sup>10)</sup>  | 3.024    |
| H(11) | C(2) <sup>10)</sup>  | 3.343    | H(11) | C(3) <sup>10)</sup>  | 3.023    |
| H(11) | C(4) <sup>10)</sup>  | 3.397    | H(11) | C(8) <sup>10)</sup>  | 3.536    |

Table 10. Distances beyond the asymmetric unit out to 3.60 Å involving hydrogens (continued)

| atom  | atom                 | distance | atom  | atom                 | distance |
|-------|----------------------|----------|-------|----------------------|----------|
| H(11) | H(4) <sup>10)</sup>  | 2.853    | H(11) | H(4) <sup>9)</sup>   | 2.865    |
| H(11) | H(5) <sup>10)</sup>  | 3.256    | H(11) | H(21) <sup>10)</sup> | 3.204    |
| H(12) | C(3) <sup>10)</sup>  | 3.226    | H(12) | C(4) <sup>10)</sup>  | 3.272    |
| H(12) | C(5) <sup>10)</sup>  | 3.457    | H(12) | C(7) <sup>10)</sup>  | 3.575    |
| H(12) | C(8) <sup>10)</sup>  | 3.383    | H(12) | C(13) <sup>2)</sup>  | 3.133    |
| H(12) | H(17) <sup>2)</sup>  | 2.477    | H(12) | H(18) <sup>2)</sup>  | 3.072    |
| H(12) | H(19) <sup>2)</sup>  | 3.426    | H(13) | C(2) <sup>9)</sup>   | 3.172    |
| H(13) | C(13) <sup>2)</sup>  | 3.421    | H(13) | H(4) <sup>9)</sup>   | 2.722    |
| H(13) | H(6) <sup>9)</sup>   | 2.889    | H(13) | H(17) <sup>2)</sup>  | 2.991    |
| H(13) | H(18) <sup>2)</sup>  | 3.453    | H(13) | H(19) <sup>2)</sup>  | 3.274    |
| H(14) | C(3) <sup>1)</sup>   | 3.514    | H(14) | C(4) <sup>1)</sup>   | 3.295    |
| H(14) | C(5) <sup>1)</sup>   | 3.066    | H(14) | C(6) <sup>5)</sup>   | 3.497    |
| H(14) | C(6) <sup>1)</sup>   | 3.081    | H(14) | C(7) <sup>1)</sup>   | 3.301    |
| H(14) | C(8) <sup>1)</sup>   | 3.517    | H(14) | H(7) <sup>5)</sup>   | 3.171    |
| H(14) | H(7) <sup>1)</sup>   | 3.487    | H(14) | H(8) <sup>5)</sup>   | 2.935    |
| H(14) | H(8) <sup>1)</sup>   | 3.399    | H(14) | H(22) <sup>9)</sup>  | 3.529    |
| H(15) | C(2) <sup>10)</sup>  | 3.263    | H(15) | C(6) <sup>5)</sup>   | 3.489    |
| H(15) | C(14) <sup>9)</sup>  | 3.192    | H(15) | H(4) <sup>10)</sup>  | 2.886    |
| H(15) | H(5) <sup>10)</sup>  | 2.763    | H(15) | H(8) <sup>5)</sup>   | 3.017    |
| H(15) | H(21) <sup>9)</sup>  | 2.558    | H(15) | H(22) <sup>9)</sup>  | 2.992    |
| H(16) | O(1) <sup>9)</sup>   | 3.330    | H(16) | C(4) <sup>1)</sup>   | 3.477    |
| H(16) | C(5) <sup>1)</sup>   | 3.320    | H(16) | H(1) <sup>9)</sup>   | 2.895    |
| H(16) | H(7) <sup>1)</sup>   | 3.359    | H(16) | H(21) <sup>9)</sup>  | 3.299    |
| H(16) | H(22) <sup>1)</sup>  | 3.474    | H(16) | H(22) <sup>9)</sup>  | 3.279    |
| H(17) | N(1) <sup>10)</sup>  | 3.233    | H(17) | C(2) <sup>10)</sup>  | 3.265    |
| H(17) | C(9) <sup>10)</sup>  | 3.270    | H(17) | C(11) <sup>10)</sup> | 3.114    |
| H(17) | H(4) <sup>10)</sup>  | 3.397    | H(17) | H(5) <sup>10)</sup>  | 2.571    |
| H(17) | H(12) <sup>10)</sup> | 2.477    | H(17) | H(13) <sup>10)</sup> | 2.991    |
| H(18) | C(5) <sup>5)</sup>   | 3.106    | H(18) | C(6) <sup>5)</sup>   | 3.595    |
| H(18) | H(7) <sup>5)</sup>   | 2.765    | H(18) | H(12) <sup>10)</sup> | 3.072    |
| H(18) | H(13) <sup>10)</sup> | 3.453    | H(19) | C(9) <sup>10)</sup>  | 3.577    |
| H(19) | H(12) <sup>10)</sup> | 3.426    | H(19) | H(13) <sup>10)</sup> | 3.274    |
| H(20) | C(1) <sup>8)</sup>   | 3.518    | H(20) | C(1) <sup>4)</sup>   | 3.316    |
| H(20) | H(1) <sup>4)</sup>   | 2.756    | H(20) | H(2) <sup>8)</sup>   | 2.905    |
| H(20) | H(3) <sup>8)</sup>   | 3.338    | H(20) | H(3) <sup>4)</sup>   | 3.032    |
| H(20) | H(8) <sup>11)</sup>  | 3.288    | H(20) | H(9) <sup>11)</sup>  | 3.273    |
| H(21) | C(2) <sup>6)</sup>   | 3.143    | H(21) | C(12) <sup>3)</sup>  | 3.315    |



Table 10. Distances beyond the asymmetric unit out to 3.60 Å involving hydrogens (continued)

| atom  | atom                | distance | atom  | atom                | distance |
|-------|---------------------|----------|-------|---------------------|----------|
| H(21) | H(4) <sup>6)</sup>  | 2.633    | H(21) | H(5) <sup>6)</sup>  | 3.153    |
| H(21) | H(6) <sup>6)</sup>  | 3.146    | H(21) | H(8) <sup>11)</sup> | 3.512    |
| H(21) | H(11) <sup>2)</sup> | 3.204    | H(21) | H(15) <sup>3)</sup> | 2.558    |
| H(21) | H(16) <sup>3)</sup> | 3.299    | H(22) | O(1) <sup>4)</sup>  | 3.210    |
| H(22) | C(3) <sup>4)</sup>  | 3.509    | H(22) | C(4) <sup>4)</sup>  | 3.579    |
| H(22) | C(12) <sup>3)</sup> | 3.447    | H(22) | C(14) <sup>4)</sup> | 3.355    |
| H(22) | H(1) <sup>4)</sup>  | 3.241    | H(22) | H(8) <sup>11)</sup> | 3.208    |
| H(22) | H(14) <sup>3)</sup> | 3.529    | H(22) | H(15) <sup>3)</sup> | 2.992    |
| H(22) | H(16) <sup>7)</sup> | 3.474    | H(22) | H(16) <sup>3)</sup> | 3.279    |
| H(22) | H(22) <sup>4)</sup> | 2.522    |       |                     |          |

Symmetry Operators:

- |                             |                             |
|-----------------------------|-----------------------------|
| (1) $-X+1, Y+1/2-1, -Z+1/2$ | (2) $-X, Y+1/2, -Z+1/2$     |
| (3) $X, -Y+1/2, Z+1/2$      | (4) $-X+1, -Y+1, -Z+1$      |
| (5) $X, Y-1, Z$             | (6) $-X, -Y+1, -Z+1$        |
| (7) $-X+1, Y+1/2, -Z+1/2$   | (8) $X, Y+1, Z$             |
| (9) $X, -Y+1/2, Z+1/2-1$    | (10) $-X, Y+1/2-1, -Z+1/2$  |
| (11) $X, -Y+1/2+1, Z+1/2$   | (12) $-X+1, -Y, -Z+1$       |
| (13) $-X, -Y, -Z+1$         | (14) $X, -Y+1/2+1, Z+1/2-1$ |

X-ray Structure Report for  $\text{Me}_2\text{Al}[\text{O}-2\text{-}^t\text{Bu}-6\text{-}\{(\text{cyclohexyl})\text{N}=\text{CH}\}\text{C}_6\text{H}_3]$  (**2c**)

May 11, 2007

## Experimental

### Data Collection

A colorless block crystal of  $C_{19}H_{30}NOAl$  having approximate dimensions of 0.50 x 0.44 x 0.20 mm was mounted on a glass fiber. All measurements were made on a Rigaku RAXIS RAPID imaging plate area detector with graphite monochromated Mo- $K\alpha$  radiation.

Indexing was performed from 3 oscillations that were exposed for 150 seconds. The crystal-to-detector distance was 127.40 mm.

Cell constants and an orientation matrix for data collection corresponded to a primitive orthorhombic cell with dimensions:

$$\begin{aligned} a &= 13.4480(3) \text{ \AA} \\ b &= 12.7111(4) \text{ \AA} \\ c &= 22.4540(5) \text{ \AA} \\ V &= 3838.26(17) \text{ \AA}^3 \end{aligned}$$

For  $Z = 8$  and F.W. = 315.43, the calculated density is 1.092 g/cm<sup>3</sup>. The systematic absences of:

$$\begin{aligned} 0kl: & k \pm 2n \\ h0l: & l \pm 2n \\ hk0: & h \pm 2n \end{aligned}$$

uniquely determine the space group to be:

$$Pbca \text{ (#61)}$$

The data were collected at a temperature of  $-30 \pm 1^\circ\text{C}$  to a maximum  $2\theta$  value of  $54.9^\circ$ . A total of 44 oscillation images were collected. A sweep of data was done using  $\omega$  scans from  $130.0$  to  $190.0^\circ$  in  $5.0^\circ$  step, at  $\chi=45.0^\circ$  and  $\phi = 120.0^\circ$ . The exposure rate was 80.0 [sec./ $^\circ$ ]. A second sweep was performed using  $\omega$  scans from  $0.0$  to  $160.0^\circ$  in  $5.0^\circ$  step, at  $\chi=45.0^\circ$  and  $\phi = 270.0^\circ$ . The exposure rate was 80.0 [sec./ $^\circ$ ]. The crystal-to-detector distance was 127.40 mm. Readout was performed in the 0.100 mm pixel mode.

## Data Reduction

Of the 34904 reflections that were collected, 4366 were unique ( $R_{\text{int}} = 0.034$ ); equivalent reflections were merged.

The linear absorption coefficient,  $\mu$ , for Mo-K $\alpha$  radiation is 1.080 cm<sup>-1</sup>. An empirical absorption correction was applied which resulted in transmission factors ranging from 0.685 to 0.979. The data were corrected for Lorentz and polarization effects.

## Structure Solution and Refinement

The structure was solved by direct methods<sup>1</sup> and expanded using Fourier techniques<sup>2</sup>. The non-hydrogen atoms were refined anisotropically. Hydrogen atoms were refined using the riding model. The final cycle of full-matrix least-squares refinement<sup>3</sup> on  $F^2$  was based on 2620 observed reflections and 229 variable parameters and converged (largest parameter shift was 0.00 times its esd) with unweighted and weighted agreement factors of:

$$R1 = \sum ||F_o| - |F_c|| / \sum |F_o| = 0.0401$$

$$wR2 = [ \sum ( w (F_o^2 - F_c^2)^2 ) / \sum w(F_o^2)^2 ]^{1/2} = 0.1046$$

The standard deviation of an observation of unit weight<sup>4</sup> was 1.00. A Sheldrick weighting scheme was used. Plots of  $\sum w (|F_o| - |F_c|)^2$  versus  $|F_o|$ , reflection order in data collection,  $\sin \theta/\lambda$  and various classes of indices showed no unusual trends. The maximum and minimum peaks on the final difference Fourier map corresponded to 0.21 and -0.21 e<sup>-</sup>/Å<sup>3</sup>, respectively.

Neutral atom scattering factors were taken from Cromer and Waber<sup>5</sup>. Anomalous dispersion effects were included in  $F_{\text{calc}}$ <sup>6</sup>; the values for  $\Delta f'$  and  $\Delta f''$  were those of Creagh and McAuley<sup>7</sup>. The values for the mass attenuation coefficients are those of Creagh and Hubbell<sup>8</sup>. All calculations were performed using the CrystalStructure<sup>9,10</sup> crystallographic software package.

## References

(1) SIR92: Altomare, A., Cascarano, G., Giacovazzo, C., Guagliardi, A., Burla, M., Polidori, G., and Camalli, M. (1994) J. Appl. Cryst., 27, 435.

(2) DIRDIF99: Beurskens, P.T., Admiraal, G., Beurskens, G., Bosman, W.P., de Gelder, R., Israel, R. and Smits, J.M.M.(1999). The DIRDIF-99 program system, Technical Report of the Crystallography Laboratory, University of Nijmegen, The Netherlands.

(3) Least Squares function minimized:

$$\sum w(F_o^2 - F_c^2)^2 \quad \text{where } w = \text{Least Squares weights.}$$

(4) Standard deviation of an observation of unit weight:

$$[\sum w(F_o^2 - F_c^2)^2 / (N_o - N_v)]^{1/2}$$

where:  $N_o$  = number of observations  
 $N_v$  = number of variables

(5) Cromer, D. T. & Waber, J. T.; "International Tables for X-ray Crystallography", Vol. IV, The Kynoch Press, Birmingham, England, Table 2.2 A (1974).

(6) Ibers, J. A. & Hamilton, W. C.; Acta Crystallogr., 17, 781 (1964).

(7) Creagh, D. C. & McAuley, W.J. ; "International Tables for Crystallography", Vol C, (A.J.C. Wilson, ed.), Kluwer Academic Publishers, Boston, Table 4.2.6.8, pages 219-222 (1992).

(8) Creagh, D. C. & Hubbell, J.H.; "International Tables for Crystallography", Vol C, (A.J.C. Wilson, ed.), Kluwer Academic Publishers, Boston, Table 4.2.4.3, pages 200-206 (1992).

(9) CrystalStructure 3.8: Crystal Structure Analysis Package, Rigaku and Rigaku/MSO (2000-2006). 9009 New Trails Dr. The Woodlands TX 77381 USA.

(10) CRYSTALS Issue 11: Carruthers, J.R., Rollett, J.S., Betteridge, P.W., Kinna, D., Pearce, L., Larsen, A., and Gabe, E. Chemical Crystallography Laboratory, Oxford, UK. (1999)

## EXPERIMENTAL DETAILS

### A. Crystal Data

|                      |                                                                                            |
|----------------------|--------------------------------------------------------------------------------------------|
| Empirical Formula    | C <sub>19</sub> H <sub>30</sub> NOAI                                                       |
| Formula Weight       | 315.43                                                                                     |
| Crystal Color, Habit | colorless, block                                                                           |
| Crystal Dimensions   | 0.50 X 0.44 X 0.20 mm                                                                      |
| Crystal System       | orthorhombic                                                                               |
| Lattice Type         | Primitive                                                                                  |
| Indexing Images      | 3 oscillations @ 150.0 seconds                                                             |
| Detector Position    | 127.40 mm                                                                                  |
| Pixel Size           | 0.100 mm                                                                                   |
| Lattice Parameters   | a = 13.4480(3) Å<br>b = 12.7111(4) Å<br>c = 22.4540(5) Å<br>V = 3838.26(17) Å <sup>3</sup> |
| Space Group          | Pbca (#61)                                                                                 |
| Z value              | 8                                                                                          |
| D <sub>calc</sub>    | 1.092 g/cm <sup>3</sup>                                                                    |
| F <sub>000</sub>     | 1376.00                                                                                    |
| μ(MoKα)              | 1.080 cm <sup>-1</sup>                                                                     |

## B. Intensity Measurements

|                                                           |                                                                            |
|-----------------------------------------------------------|----------------------------------------------------------------------------|
| Diffractometer                                            | Rigaku RAXIS-RAPID                                                         |
| Radiation                                                 | MoK $\alpha$ ( $\lambda = 0.71075 \text{ \AA}$ )<br>graphite monochromated |
| Detector Aperture                                         | 280 mm x 256 mm                                                            |
| Data Images                                               | 44 exposures                                                               |
| $\omega$ oscillation Range ( $\chi=45.0$ , $\phi=120.0$ ) | 130.0 - 190.0 $^\circ$                                                     |
| Exposure Rate                                             | 80.0 sec./ $^\circ$                                                        |
| $\omega$ oscillation Range ( $\chi=45.0$ , $\phi=270.0$ ) | 0.0 - 160.0 $^\circ$                                                       |
| Exposure Rate                                             | 80.0 sec./ $^\circ$                                                        |
| Detector Position                                         | 127.40 mm                                                                  |
| Pixel Size                                                | 0.100 mm                                                                   |
| $2\theta_{\max}$                                          | 54.9 $^\circ$                                                              |
| No. of Reflections Measured                               | Total: 34904<br>Unique: 4366 ( $R_{\text{int}} = 0.034$ )                  |
| Corrections                                               | Lorentz-polarization<br>Absorption<br>(trans. factors: 0.685 - 0.979)      |

### C. Structure Solution and Refinement

|                                          |                                                |
|------------------------------------------|------------------------------------------------|
| Structure Solution                       | Direct Methods (SIR92)                         |
| Refinement                               | Full-matrix least-squares on $F^2$             |
| Function Minimized                       | $\sum w (F_o^2 - F_c^2)^2$                     |
| Least Squares Weights                    | $1/[0.0013F_o^2+1.0000\sigma(F_o^2)]/(4F_o^2)$ |
| $2\theta_{\max}$ cutoff                  | 54.9°                                          |
| Anomalous Dispersion                     | All non-hydrogen atoms                         |
| No. Observations ( $I > 2.00\sigma(I)$ ) | 2620                                           |
| No. Variables                            | 229                                            |
| Reflection/Parameter Ratio               | 11.44                                          |
| Residuals: R1 ( $I > 2.00\sigma(I)$ )    | 0.0401                                         |
| Residuals: wR2 ( $I > 2.00\sigma(I)$ )   | 0.1046                                         |
| Goodness of Fit Indicator                | 1.000                                          |
| Max Shift/Error in Final Cycle           | 0.000                                          |
| Maximum peak in Final Diff. Map          | 0.21 e <sup>-</sup> /Å <sup>3</sup>            |
| Minimum peak in Final Diff. Map          | -0.21 e <sup>-</sup> /Å <sup>3</sup>           |



Table 1. Atomic coordinates and  $B_{\text{iso}}/B_{\text{eq}}$

| atom  | x           | y            | z           | $B_{\text{eq}}$ |
|-------|-------------|--------------|-------------|-----------------|
| Al(1) | 0.51135(4)  | 0.06681(5)   | 0.68000(2)  | 3.013(12)       |
| O(1)  | 0.42123(9)  | 0.09628(10)  | 0.62473(5)  | 3.21(2)         |
| N(1)  | 0.43087(11) | 0.12024(12)  | 0.74657(6)  | 2.86(3)         |
| C(1)  | 0.62723(17) | 0.1585(2)    | 0.67194(11) | 5.52(6)         |
| C(2)  | 0.5363(2)   | -0.08452(18) | 0.68526(10) | 4.91(5)         |
| C(3)  | 0.35899(13) | 0.17786(14)  | 0.62373(8)  | 2.81(3)         |
| C(4)  | 0.32809(12) | 0.22423(15)  | 0.67793(8)  | 2.94(3)         |
| C(5)  | 0.36193(13) | 0.18827(15)  | 0.73568(8)  | 3.00(4)         |
| C(6)  | 0.32187(13) | 0.21705(15)  | 0.56883(8)  | 3.00(3)         |
| C(7)  | 0.25419(15) | 0.29983(17)  | 0.57184(9)  | 3.71(4)         |
| C(8)  | 0.22300(15) | 0.34574(18)  | 0.62495(10) | 4.18(5)         |
| C(9)  | 0.25992(15) | 0.30826(17)  | 0.67788(9)  | 3.67(4)         |
| C(10) | 0.35724(15) | 0.17263(16)  | 0.50874(8)  | 3.42(4)         |
| C(11) | 0.47018(16) | 0.1868(2)    | 0.50272(9)  | 4.68(5)         |
| C(12) | 0.32965(18) | 0.05572(18)  | 0.50381(9)  | 4.44(5)         |
| C(13) | 0.30774(19) | 0.2294(2)    | 0.45621(9)  | 5.07(5)         |
| C(14) | 0.44822(15) | 0.09490(16)  | 0.81057(8)  | 3.27(4)         |
| C(15) | 0.39898(16) | -0.00859(18) | 0.82712(9)  | 4.23(5)         |
| C(16) | 0.41749(19) | -0.0340(2)   | 0.89284(10) | 5.29(6)         |
| C(17) | 0.52682(19) | -0.0348(2)   | 0.90749(10) | 5.30(6)         |
| C(18) | 0.57584(19) | 0.0668(2)    | 0.89002(10) | 5.35(6)         |
| C(19) | 0.55867(15) | 0.09242(18)  | 0.82464(9)  | 4.12(5)         |

$$B_{\text{eq}} = 8/3 \pi^2 (U_{11}(aa^*)^2 + U_{22}(bb^*)^2 + U_{33}(cc^*)^2 + 2U_{12}(aa^*bb^*)\cos \gamma + 2U_{13}(aa^*cc^*)\cos \beta + 2U_{23}(bb^*cc^*)\cos \alpha)$$

Table 2. Atomic coordinates and  $B_{\text{iso}}$  involving hydrogens/ $B_{\text{eq}}$

| atom  | x      | y       | z      | $B_{\text{eq}}$ |
|-------|--------|---------|--------|-----------------|
| H(1)  | 0.6586 | 0.1458  | 0.6347 | 6.66            |
| H(2)  | 0.6065 | 0.2298  | 0.6739 | 6.68            |
| H(3)  | 0.6728 | 0.1445  | 0.7033 | 6.68            |
| H(4)  | 0.5219 | -0.1168 | 0.6481 | 5.96            |
| H(5)  | 0.6040 | -0.0967 | 0.6952 | 5.99            |
| H(6)  | 0.4948 | -0.1137 | 0.7152 | 5.97            |
| H(7)  | 0.3268 | 0.2224  | 0.7708 | 3.61            |
| H(8)  | 0.2289 | 0.3298  | 0.5315 | 4.44            |
| H(9)  | 0.1726 | 0.4068  | 0.6257 | 5.01            |
| H(10) | 0.2379 | 0.3439  | 0.7191 | 4.42            |
| H(11) | 0.4902 | 0.1664  | 0.4638 | 5.60            |
| H(12) | 0.4876 | 0.2583  | 0.5093 | 5.62            |
| H(13) | 0.5027 | 0.1437  | 0.5313 | 5.62            |
| H(14) | 0.3482 | 0.0305  | 0.4656 | 5.35            |
| H(15) | 0.3640 | 0.0170  | 0.5336 | 5.32            |
| H(16) | 0.2600 | 0.0473  | 0.5091 | 5.34            |
| H(17) | 0.3296 | 0.3004  | 0.4552 | 6.09            |
| H(18) | 0.3255 | 0.1955  | 0.4200 | 6.10            |
| H(19) | 0.2376 | 0.2275  | 0.4609 | 6.08            |
| H(20) | 0.4152 | 0.1525  | 0.8347 | 3.91            |
| H(21) | 0.4279 | -0.0628 | 0.8037 | 5.08            |
| H(22) | 0.3298 | -0.0045 | 0.8189 | 5.08            |
| H(23) | 0.3860 | 0.0188  | 0.9161 | 6.34            |
| H(24) | 0.3894 | -0.1006 | 0.9020 | 6.36            |
| H(25) | 0.5573 | -0.0905 | 0.8860 | 6.34            |
| H(26) | 0.5354 | -0.0462 | 0.9490 | 6.39            |
| H(27) | 0.6454 | 0.0617  | 0.8969 | 6.42            |
| H(28) | 0.5490 | 0.1219  | 0.9137 | 6.39            |
| H(29) | 0.5890 | 0.0397  | 0.8008 | 4.93            |
| H(30) | 0.5868 | 0.1590  | 0.8153 | 4.97            |

$$B_{\text{eq}} = 8/3 \pi^2 (U_{11}(aa^*)^2 + U_{22}(bb^*)^2 + U_{33}(cc^*)^2 + 2U_{12}(aa^*bb^*)\cos \gamma + 2U_{13}(aa^*cc^*)\cos \beta + 2U_{23}(bb^*cc^*)\cos \alpha)$$

Table 3. Anisotropic displacement parameters

| atom  | U <sub>11</sub> | U <sub>22</sub> | U <sub>33</sub> | U <sub>12</sub> | U <sub>13</sub> | U <sub>23</sub> |
|-------|-----------------|-----------------|-----------------|-----------------|-----------------|-----------------|
| Al(1) | 0.0386(3)       | 0.0360(3)       | 0.0399(3)       | 0.0062(2)       | -0.0016(2)      | 0.0010(2)       |
| O(1)  | 0.0453(7)       | 0.0348(7)       | 0.0418(6)       | 0.0098(6)       | -0.0040(5)      | -0.0016(5)      |
| N(1)  | 0.0372(8)       | 0.0310(8)       | 0.0403(7)       | -0.0013(7)      | -0.0009(6)      | 0.0009(7)       |
| C(1)  | 0.0532(13)      | 0.088(2)        | 0.0685(15)      | -0.0116(13)     | 0.0035(11)      | 0.0098(13)      |
| C(2)  | 0.0811(16)      | 0.0519(15)      | 0.0534(12)      | 0.0258(12)      | -0.0084(11)     | -0.0020(10)     |
| C(3)  | 0.0327(9)       | 0.0263(9)       | 0.0477(10)      | -0.0013(7)      | -0.0019(7)      | 0.0032(7)       |
| C(4)  | 0.0337(8)       | 0.0318(10)      | 0.0463(10)      | 0.0002(7)       | 0.0016(8)       | 0.0025(8)       |
| C(5)  | 0.0370(9)       | 0.0305(10)      | 0.0465(10)      | -0.0033(8)      | 0.0049(7)       | -0.0013(7)      |
| C(6)  | 0.0374(9)       | 0.0293(10)      | 0.0473(10)      | -0.0037(8)      | -0.0041(7)      | 0.0054(8)       |
| C(7)  | 0.0463(10)      | 0.0383(12)      | 0.0563(12)      | 0.0047(9)       | -0.0046(9)      | 0.0111(9)       |
| C(8)  | 0.0479(12)      | 0.0434(13)      | 0.0673(14)      | 0.0149(10)      | 0.0017(9)       | 0.0079(11)      |
| C(9)  | 0.0434(10)      | 0.0392(12)      | 0.0570(12)      | 0.0073(9)       | 0.0051(9)       | 0.0014(9)       |
| C(10) | 0.0513(11)      | 0.0364(11)      | 0.0422(10)      | 0.0015(9)       | -0.0028(8)      | 0.0070(8)       |
| C(11) | 0.0612(14)      | 0.0632(16)      | 0.0532(12)      | -0.0003(12)     | 0.0083(10)      | 0.0044(10)      |
| C(12) | 0.0777(15)      | 0.0416(13)      | 0.0492(12)      | -0.0027(11)     | -0.0061(10)     | -0.0019(9)      |
| C(13) | 0.0846(16)      | 0.0591(15)      | 0.0491(12)      | 0.0100(14)      | -0.0059(11)     | 0.0120(11)      |
| C(14) | 0.0512(11)      | 0.0359(11)      | 0.0372(9)       | 0.0051(8)       | 0.0034(8)       | 0.0010(7)       |
| C(15) | 0.0527(12)      | 0.0503(14)      | 0.0579(13)      | -0.0038(10)     | 0.0083(9)       | 0.0102(10)      |
| C(16) | 0.0882(17)      | 0.0545(15)      | 0.0584(13)      | 0.0053(13)      | 0.0226(12)      | 0.0137(11)      |
| C(17) | 0.0933(18)      | 0.0641(17)      | 0.0442(12)      | 0.0234(14)      | 0.0003(11)      | 0.0093(10)      |
| C(18) | 0.0808(17)      | 0.0698(17)      | 0.0525(12)      | 0.0037(14)      | -0.0182(11)     | -0.0006(12)     |
| C(19) | 0.0547(12)      | 0.0533(15)      | 0.0486(11)      | -0.0096(10)     | -0.0101(9)      | 0.0048(10)      |

The general temperature factor expression:  $\exp(-2\pi^2(a^2U_{11}h^2 + b^2U_{22}k^2 + c^2U_{33}l^2 + 2a*b*U_{12}hk + 2a*c*U_{13}hl + 2b*c*U_{23}kl))$

Table 4. Bond lengths (Å)

| atom  | atom  | distance   | atom  | atom  | distance   |
|-------|-------|------------|-------|-------|------------|
| Al(1) | O(1)  | 1.7746(12) | Al(1) | N(1)  | 1.9664(14) |
| Al(1) | C(1)  | 1.954(2)   | Al(1) | C(2)  | 1.956(2)   |
| O(1)  | C(3)  | 1.333(2)   | N(1)  | C(5)  | 1.291(2)   |
| N(1)  | C(14) | 1.491(2)   | C(3)  | C(4)  | 1.415(2)   |
| C(3)  | C(6)  | 1.420(2)   | C(4)  | C(5)  | 1.448(2)   |
| C(4)  | C(9)  | 1.408(2)   | C(6)  | C(7)  | 1.393(2)   |
| C(6)  | C(10) | 1.538(2)   | C(7)  | C(8)  | 1.392(3)   |
| C(8)  | C(9)  | 1.373(3)   | C(10) | C(11) | 1.535(2)   |
| C(10) | C(12) | 1.536(3)   | C(10) | C(13) | 1.534(2)   |
| C(14) | C(15) | 1.519(3)   | C(14) | C(19) | 1.519(2)   |
| C(15) | C(16) | 1.531(3)   | C(16) | C(17) | 1.507(3)   |
| C(17) | C(18) | 1.502(3)   | C(18) | C(19) | 1.521(3)   |

Table 5. Bond lengths involving hydrogens (Å)

| atom  | atom  | distance | atom  | atom  | distance |
|-------|-------|----------|-------|-------|----------|
| C(1)  | H(1)  | 0.950    | C(1)  | H(2)  | 0.950    |
| C(1)  | H(3)  | 0.950    | C(2)  | H(4)  | 0.950    |
| C(2)  | H(5)  | 0.950    | C(2)  | H(6)  | 0.950    |
| C(5)  | H(7)  | 1.016    | C(7)  | H(8)  | 1.040    |
| C(8)  | H(9)  | 1.030    | C(9)  | H(10) | 1.072    |
| C(11) | H(11) | 0.950    | C(11) | H(12) | 0.950    |
| C(11) | H(13) | 0.950    | C(12) | H(14) | 0.950    |
| C(12) | H(15) | 0.950    | C(12) | H(16) | 0.950    |
| C(13) | H(17) | 0.950    | C(13) | H(18) | 0.950    |
| C(13) | H(19) | 0.950    | C(14) | H(20) | 1.014    |
| C(15) | H(21) | 0.950    | C(15) | H(22) | 0.950    |
| C(16) | H(23) | 0.950    | C(16) | H(24) | 0.950    |
| C(17) | H(25) | 0.950    | C(17) | H(26) | 0.950    |
| C(18) | H(27) | 0.950    | C(18) | H(28) | 0.950    |
| C(19) | H(29) | 0.950    | C(19) | H(30) | 0.950    |

Table 6. Bond angles (°)

| atom  | atom  | atom  | angle      | atom  | atom  | atom  | angle      |
|-------|-------|-------|------------|-------|-------|-------|------------|
| O(1)  | Al(1) | N(1)  | 94.75(6)   | O(1)  | Al(1) | C(1)  | 110.73(8)  |
| O(1)  | Al(1) | C(2)  | 111.54(8)  | N(1)  | Al(1) | C(1)  | 107.66(9)  |
| N(1)  | Al(1) | C(2)  | 112.85(8)  | C(1)  | Al(1) | C(2)  | 117.05(11) |
| Al(1) | O(1)  | C(3)  | 127.22(11) | Al(1) | N(1)  | C(5)  | 118.85(11) |
| Al(1) | N(1)  | C(14) | 124.88(11) | C(5)  | N(1)  | C(14) | 116.08(14) |
| O(1)  | C(3)  | C(4)  | 119.61(15) | O(1)  | C(3)  | C(6)  | 120.55(15) |
| C(4)  | C(3)  | C(6)  | 119.82(16) | C(3)  | C(4)  | C(5)  | 123.12(16) |
| C(3)  | C(4)  | C(9)  | 120.45(16) | C(5)  | C(4)  | C(9)  | 116.41(16) |
| N(1)  | C(5)  | C(4)  | 127.34(16) | C(3)  | C(6)  | C(7)  | 116.91(16) |
| C(3)  | C(6)  | C(10) | 121.60(16) | C(7)  | C(6)  | C(10) | 121.46(16) |
| C(6)  | C(7)  | C(8)  | 123.71(18) | C(7)  | C(8)  | C(9)  | 119.14(19) |
| C(4)  | C(9)  | C(8)  | 119.96(18) | C(6)  | C(10) | C(11) | 109.89(15) |
| C(6)  | C(10) | C(12) | 110.11(15) | C(6)  | C(10) | C(13) | 111.57(16) |
| C(11) | C(10) | C(12) | 110.24(18) | C(11) | C(10) | C(13) | 107.84(17) |
| C(12) | C(10) | C(13) | 107.13(17) | N(1)  | C(14) | C(15) | 110.77(15) |
| N(1)  | C(14) | C(19) | 110.98(15) | C(15) | C(14) | C(19) | 110.94(17) |
| C(14) | C(15) | C(16) | 110.34(17) | C(15) | C(16) | C(17) | 111.75(19) |
| C(16) | C(17) | C(18) | 111.4(2)   | C(17) | C(18) | C(19) | 111.67(19) |
| C(14) | C(19) | C(18) | 110.71(17) |       |       |       |            |

Table 7. Bond angles involving hydrogens (°)

| atom  | atom  | atom  | angle | atom  | atom  | atom  | angle |
|-------|-------|-------|-------|-------|-------|-------|-------|
| Al(1) | C(1)  | H(1)  | 109.6 | Al(1) | C(1)  | H(2)  | 109.3 |
| Al(1) | C(1)  | H(3)  | 109.5 | H(1)  | C(1)  | H(2)  | 109.5 |
| H(1)  | C(1)  | H(3)  | 109.5 | H(2)  | C(1)  | H(3)  | 109.5 |
| Al(1) | C(2)  | H(4)  | 109.6 | Al(1) | C(2)  | H(5)  | 109.8 |
| Al(1) | C(2)  | H(6)  | 109.0 | H(4)  | C(2)  | H(5)  | 109.5 |
| H(4)  | C(2)  | H(6)  | 109.5 | H(5)  | C(2)  | H(6)  | 109.5 |
| N(1)  | C(5)  | H(7)  | 118.2 | C(4)  | C(5)  | H(7)  | 114.4 |
| C(6)  | C(7)  | H(8)  | 116.6 | C(8)  | C(7)  | H(8)  | 119.6 |
| C(7)  | C(8)  | H(9)  | 121.8 | C(9)  | C(8)  | H(9)  | 119.0 |
| C(4)  | C(9)  | H(10) | 120.0 | C(8)  | C(9)  | H(10) | 120.1 |
| C(10) | C(11) | H(11) | 109.2 | C(10) | C(11) | H(12) | 110.0 |
| C(10) | C(11) | H(13) | 109.2 | H(11) | C(11) | H(12) | 109.5 |
| H(11) | C(11) | H(13) | 109.5 | H(12) | C(11) | H(13) | 109.5 |
| C(10) | C(12) | H(14) | 109.1 | C(10) | C(12) | H(15) | 109.5 |
| C(10) | C(12) | H(16) | 109.8 | H(14) | C(12) | H(15) | 109.5 |
| H(14) | C(12) | H(16) | 109.5 | H(15) | C(12) | H(16) | 109.5 |
| C(10) | C(13) | H(17) | 109.3 | C(10) | C(13) | H(18) | 109.6 |
| C(10) | C(13) | H(19) | 109.5 | H(17) | C(13) | H(18) | 109.5 |
| H(17) | C(13) | H(19) | 109.5 | H(18) | C(13) | H(19) | 109.5 |
| N(1)  | C(14) | H(20) | 106.9 | C(15) | C(14) | H(20) | 107.7 |
| C(19) | C(14) | H(20) | 109.4 | C(14) | C(15) | H(21) | 108.3 |
| C(14) | C(15) | H(22) | 109.4 | C(16) | C(15) | H(21) | 108.3 |
| C(16) | C(15) | H(22) | 110.9 | H(21) | C(15) | H(22) | 109.5 |
| C(15) | C(16) | H(23) | 108.0 | C(15) | C(16) | H(24) | 109.4 |
| C(17) | C(16) | H(23) | 108.6 | C(17) | C(16) | H(24) | 109.6 |
| H(23) | C(16) | H(24) | 109.5 | C(16) | C(17) | H(25) | 108.3 |
| C(16) | C(17) | H(26) | 109.5 | C(18) | C(17) | H(25) | 108.6 |
| C(18) | C(17) | H(26) | 109.5 | H(25) | C(17) | H(26) | 109.5 |
| C(17) | C(18) | H(27) | 109.3 | C(17) | C(18) | H(28) | 108.7 |
| C(19) | C(18) | H(27) | 108.8 | C(19) | C(18) | H(28) | 109.0 |
| H(27) | C(18) | H(28) | 109.5 | C(14) | C(19) | H(29) | 108.5 |
| C(14) | C(19) | H(30) | 109.0 | C(18) | C(19) | H(29) | 109.1 |
| C(18) | C(19) | H(30) | 110.0 | H(29) | C(19) | H(30) | 109.5 |

Table 8. Torsion Angles(°)

| atom1 | atom2 | atom3 | atom4 | angle       | atom1 | atom2 | atom3 | atom4 | angle       |
|-------|-------|-------|-------|-------------|-------|-------|-------|-------|-------------|
| O(1)  | Al(1) | N(1)  | C(5)  | -22.89(14)  | O(1)  | Al(1) | N(1)  | C(14) | 162.36(14)  |
| N(1)  | Al(1) | O(1)  | C(3)  | 34.80(14)   | C(1)  | Al(1) | O(1)  | C(3)  | -76.11(16)  |
| C(2)  | Al(1) | O(1)  | C(3)  | 151.65(14)  | C(1)  | Al(1) | N(1)  | C(5)  | 90.64(15)   |
| C(1)  | Al(1) | N(1)  | C(14) | -84.11(16)  | C(2)  | Al(1) | N(1)  | C(5)  | -138.66(15) |
| C(2)  | Al(1) | N(1)  | C(14) | 46.59(17)   | Al(1) | O(1)  | C(3)  | C(4)  | -27.9(2)    |
| Al(1) | O(1)  | C(3)  | C(6)  | 153.49(13)  | Al(1) | N(1)  | C(5)  | C(4)  | 6.9(2)      |
| Al(1) | N(1)  | C(14) | C(15) | -84.31(18)  | Al(1) | N(1)  | C(14) | C(19) | 39.4(2)     |
| C(5)  | N(1)  | C(14) | C(15) | 100.81(19)  | C(5)  | N(1)  | C(14) | C(19) | -135.49(17) |
| C(14) | N(1)  | C(5)  | C(4)  | -177.92(17) | O(1)  | C(3)  | C(4)  | C(5)  | 0.9(2)      |
| O(1)  | C(3)  | C(4)  | C(9)  | -177.95(16) | O(1)  | C(3)  | C(6)  | C(7)  | 177.56(16)  |
| O(1)  | C(3)  | C(6)  | C(10) | -4.4(2)     | C(4)  | C(3)  | C(6)  | C(7)  | -1.1(2)     |
| C(4)  | C(3)  | C(6)  | C(10) | 177.00(16)  | C(6)  | C(3)  | C(4)  | C(5)  | 179.50(16)  |
| C(6)  | C(3)  | C(4)  | C(9)  | 0.7(2)      | C(3)  | C(4)  | C(5)  | N(1)  | 8.5(2)      |
| C(3)  | C(4)  | C(9)  | C(8)  | -0.0(2)     | C(5)  | C(4)  | C(9)  | C(8)  | -178.90(18) |
| C(9)  | C(4)  | C(5)  | N(1)  | -172.65(18) | C(3)  | C(6)  | C(7)  | C(8)  | 0.9(2)      |
| C(3)  | C(6)  | C(10) | C(11) | -59.3(2)    | C(3)  | C(6)  | C(10) | C(12) | 62.3(2)     |
| C(3)  | C(6)  | C(10) | C(13) | -178.91(17) | C(7)  | C(6)  | C(10) | C(11) | 118.7(2)    |
| C(7)  | C(6)  | C(10) | C(12) | -119.7(2)   | C(7)  | C(6)  | C(10) | C(13) | -0.9(2)     |
| C(10) | C(6)  | C(7)  | C(8)  | -177.23(19) | C(6)  | C(7)  | C(8)  | C(9)  | -0.2(3)     |
| C(7)  | C(8)  | C(9)  | C(4)  | -0.2(3)     | N(1)  | C(14) | C(15) | C(16) | 179.84(16)  |
| N(1)  | C(14) | C(19) | C(18) | 179.84(17)  | C(15) | C(14) | C(19) | C(18) | -56.6(2)    |
| C(19) | C(14) | C(15) | C(16) | 56.1(2)     | C(14) | C(15) | C(16) | C(17) | -55.4(2)    |
| C(15) | C(16) | C(17) | C(18) | 54.9(2)     | C(16) | C(17) | C(18) | C(19) | -55.1(2)    |
| C(17) | C(18) | C(19) | C(14) | 55.9(2)     |       |       |       |       |             |

The sign is positive if when looking from atom 2 to atom 3 a clock-wise motion of atom 1 would superimpose it on atom 4.



Table 9. Distances beyond the asymmetric unit out to 3.60 Å

| atom  | atom  | distance   | atom  | atom  | distance   |
|-------|-------|------------|-------|-------|------------|
| Al(1) | C(3)  | 2.7905(18) | Al(1) | C(4)  | 3.1749(18) |
| Al(1) | C(5)  | 2.8257(18) | Al(1) | C(14) | 3.0731(18) |
| Al(1) | C(19) | 3.325(2)   | O(1)  | N(1)  | 2.7557(17) |
| O(1)  | C(1)  | 3.070(2)   | O(1)  | C(2)  | 3.086(2)   |
| O(1)  | C(4)  | 2.375(2)   | O(1)  | C(5)  | 2.865(2)   |
| O(1)  | C(6)  | 2.391(2)   | O(1)  | C(10) | 2.910(2)   |
| O(1)  | C(11) | 3.043(2)   | O(1)  | C(12) | 3.026(2)   |
| N(1)  | O(1)  | 2.7557(17) | N(1)  | C(1)  | 3.165(2)   |
| N(1)  | C(2)  | 3.268(2)   | N(1)  | C(3)  | 3.013(2)   |
| N(1)  | C(4)  | 2.456(2)   | N(1)  | C(15) | 2.477(2)   |
| N(1)  | C(19) | 2.480(2)   | C(1)  | O(1)  | 3.070(2)   |
| C(1)  | N(1)  | 3.165(2)   | C(1)  | C(2)  | 3.335(3)   |
| C(2)  | O(1)  | 3.086(2)   | C(2)  | N(1)  | 3.268(2)   |
| C(2)  | C(1)  | 3.335(3)   | C(3)  | Al(1) | 2.7905(18) |
| C(3)  | N(1)  | 3.013(2)   | C(3)  | C(5)  | 2.518(2)   |
| C(3)  | C(7)  | 2.397(2)   | C(3)  | C(8)  | 2.811(2)   |
| C(3)  | C(9)  | 2.450(2)   | C(3)  | C(10) | 2.583(2)   |
| C(3)  | C(11) | 3.103(2)   | C(3)  | C(12) | 3.133(2)   |
| C(4)  | Al(1) | 3.1749(18) | C(4)  | O(1)  | 2.375(2)   |
| C(4)  | N(1)  | 2.456(2)   | C(4)  | C(6)  | 2.453(2)   |
| C(4)  | C(7)  | 2.754(2)   | C(4)  | C(8)  | 2.408(2)   |
| C(5)  | Al(1) | 2.8257(18) | C(5)  | O(1)  | 2.865(2)   |
| C(5)  | C(3)  | 2.518(2)   | C(5)  | C(9)  | 2.427(2)   |
| C(5)  | C(14) | 2.363(2)   | C(5)  | C(15) | 3.275(2)   |
| C(5)  | C(19) | 3.532(2)   | C(6)  | O(1)  | 2.391(2)   |
| C(6)  | C(4)  | 2.453(2)   | C(6)  | C(8)  | 2.456(2)   |
| C(6)  | C(9)  | 2.834(2)   | C(6)  | C(11) | 2.516(2)   |
| C(6)  | C(12) | 2.519(2)   | C(6)  | C(13) | 2.541(2)   |
| C(7)  | C(3)  | 2.397(2)   | C(7)  | C(4)  | 2.754(2)   |
| C(7)  | C(9)  | 2.385(2)   | C(7)  | C(10) | 2.558(2)   |
| C(7)  | C(11) | 3.593(3)   | C(7)  | C(13) | 2.839(2)   |
| C(8)  | C(3)  | 2.811(2)   | C(8)  | C(4)  | 2.408(2)   |
| C(8)  | C(6)  | 2.456(2)   | C(9)  | C(3)  | 2.450(2)   |
| C(9)  | C(5)  | 2.427(2)   | C(9)  | C(6)  | 2.834(2)   |
| C(9)  | C(7)  | 2.385(2)   | C(10) | O(1)  | 2.910(2)   |
| C(10) | C(3)  | 2.583(2)   | C(10) | C(7)  | 2.558(2)   |
| C(11) | O(1)  | 3.043(2)   | C(11) | C(3)  | 3.103(2)   |

Table 9. Distances beyond the asymmetric unit out to 3.60 Å (continued)

| atom  | atom  | distance | atom  | atom  | distance   |
|-------|-------|----------|-------|-------|------------|
| C(11) | C(6)  | 2.516(2) | C(11) | C(7)  | 3.593(3)   |
| C(11) | C(12) | 2.519(3) | C(11) | C(13) | 2.481(3)   |
| C(12) | O(1)  | 3.026(2) | C(12) | C(3)  | 3.133(2)   |
| C(12) | C(6)  | 2.519(2) | C(12) | C(11) | 2.519(3)   |
| C(12) | C(13) | 2.470(3) | C(13) | C(6)  | 2.541(2)   |
| C(13) | C(7)  | 2.839(2) | C(13) | C(11) | 2.481(3)   |
| C(13) | C(12) | 2.470(3) | C(14) | Al(1) | 3.0731(18) |
| C(14) | C(5)  | 2.363(2) | C(14) | C(16) | 2.503(3)   |
| C(14) | C(17) | 2.928(3) | C(14) | C(18) | 2.501(3)   |
| C(15) | N(1)  | 2.477(2) | C(15) | C(5)  | 3.275(2)   |
| C(15) | C(17) | 2.515(3) | C(15) | C(18) | 2.928(3)   |
| C(15) | C(19) | 2.503(3) | C(16) | C(14) | 2.503(3)   |
| C(16) | C(18) | 2.486(3) | C(16) | C(19) | 2.921(3)   |
| C(17) | C(14) | 2.928(3) | C(17) | C(15) | 2.515(3)   |
| C(17) | C(19) | 2.502(3) | C(18) | C(14) | 2.501(3)   |
| C(18) | C(15) | 2.928(3) | C(18) | C(16) | 2.486(3)   |
| C(19) | Al(1) | 3.325(2) | C(19) | N(1)  | 2.480(2)   |
| C(19) | C(5)  | 3.532(2) | C(19) | C(15) | 2.503(3)   |
| C(19) | C(16) | 2.921(3) | C(19) | C(17) | 2.502(3)   |

Table 10. Distances beyond the asymmetric unit out to 3.60 Å involving hydrogens

| atom  | atom                | distance | atom  | atom                | distance |
|-------|---------------------|----------|-------|---------------------|----------|
| Al(1) | H(1)                | 2.442    | Al(1) | H(2)                | 2.439    |
| Al(1) | H(3)                | 2.441    | Al(1) | H(4)                | 2.445    |
| Al(1) | H(5)                | 2.447    | Al(1) | H(6)                | 2.437    |
| Al(1) | H(9) <sup>1)</sup>  | 3.428    | Al(1) | H(13)               | 3.481    |
| Al(1) | H(21)               | 3.419    | Al(1) | H(29)               | 2.927    |
| Al(1) | H(30)               | 3.411    | O(1)  | H(1)                | 3.262    |
| O(1)  | H(2)                | 3.211    | O(1)  | H(4)                | 3.072    |
| O(1)  | H(6)                | 3.497    | O(1)  | H(9) <sup>1)</sup>  | 2.720    |
| O(1)  | H(12)               | 3.429    | O(1)  | H(13)               | 2.442    |
| O(1)  | H(15)               | 2.408    | O(1)  | H(16)               | 3.440    |
| N(1)  | H(2)                | 3.191    | N(1)  | H(3)                | 3.409    |
| N(1)  | H(6)                | 3.174    | N(1)  | H(7)                | 1.985    |
| N(1)  | H(20)               | 2.033    | N(1)  | H(21)               | 2.657    |
| N(1)  | H(22)               | 2.646    | N(1)  | H(29)               | 2.656    |
| N(1)  | H(30)               | 2.650    | C(1)  | H(5)                | 3.300    |
| C(1)  | H(7) <sup>2)</sup>  | 3.085    | C(1)  | H(13)               | 3.580    |
| C(1)  | H(22) <sup>2)</sup> | 3.428    | C(1)  | H(24) <sup>3)</sup> | 3.490    |
| C(1)  | H(29)               | 3.304    | C(1)  | H(30)               | 3.265    |
| C(2)  | H(1)                | 3.544    | C(2)  | H(3)                | 3.464    |
| C(2)  | H(7) <sup>4)</sup>  | 3.222    | C(2)  | H(9) <sup>1)</sup>  | 3.115    |
| C(2)  | H(11) <sup>5)</sup> | 3.524    | C(2)  | H(18) <sup>5)</sup> | 3.321    |
| C(2)  | H(20) <sup>4)</sup> | 3.435    | C(2)  | H(21)               | 3.046    |
| C(2)  | H(29)               | 3.118    | C(3)  | H(2)                | 3.576    |
| C(3)  | H(7)                | 3.378    | C(3)  | H(8)                | 3.329    |
| C(3)  | H(9) <sup>1)</sup>  | 3.472    | C(3)  | H(10)               | 3.419    |
| C(3)  | H(12)               | 3.262    | C(3)  | H(13)               | 2.869    |
| C(3)  | H(15)               | 2.879    | C(3)  | H(16)               | 3.340    |
| C(3)  | H(25) <sup>3)</sup> | 3.160    | C(3)  | H(27) <sup>6)</sup> | 3.263    |
| C(4)  | H(3) <sup>6)</sup>  | 3.536    | C(4)  | H(7)                | 2.085    |
| C(4)  | H(9)                | 3.336    | C(4)  | H(10)               | 2.154    |
| C(4)  | H(25) <sup>3)</sup> | 3.159    | C(4)  | H(30) <sup>6)</sup> | 3.352    |
| C(5)  | H(3) <sup>6)</sup>  | 2.943    | C(5)  | H(5) <sup>3)</sup>  | 3.176    |
| C(5)  | H(6) <sup>3)</sup>  | 3.356    | C(5)  | H(10)               | 2.614    |
| C(5)  | H(20)               | 2.381    | C(5)  | H(22)               | 3.112    |
| C(5)  | H(30)               | 3.533    | C(6)  | H(8)                | 2.079    |
| C(6)  | H(9)                | 3.387    | C(6)  | H(11)               | 3.332    |
| C(6)  | H(12)               | 2.651    | C(6)  | H(13)               | 2.737    |

Table 10. Distances beyond the asymmetric unit out to 3.60 Å involving hydrogens (continued)

| atom  | atom                | distance | atom  | atom                | distance |
|-------|---------------------|----------|-------|---------------------|----------|
| C(6)  | H(14)               | 3.335    | C(6)  | H(15)               | 2.724    |
| C(6)  | H(16)               | 2.674    | C(6)  | H(17)               | 2.764    |
| C(6)  | H(18)               | 3.353    | C(6)  | H(19)               | 2.678    |
| C(6)  | H(25) <sup>3)</sup> | 3.108    | C(6)  | H(26) <sup>3)</sup> | 3.592    |
| C(6)  | H(27) <sup>6)</sup> | 3.182    | C(7)  | H(9)                | 2.124    |
| C(7)  | H(10)               | 3.361    | C(7)  | H(12)               | 3.479    |
| C(7)  | H(15) <sup>7)</sup> | 3.299    | C(7)  | H(16)               | 3.507    |
| C(7)  | H(16) <sup>7)</sup> | 3.452    | C(7)  | H(17)               | 2.808    |
| C(7)  | H(19)               | 2.664    | C(7)  | H(25) <sup>3)</sup> | 3.045    |
| C(7)  | H(26) <sup>3)</sup> | 3.472    | C(7)  | H(27) <sup>6)</sup> | 3.435    |
| C(7)  | H(28) <sup>6)</sup> | 3.582    | C(8)  | H(4) <sup>7)</sup>  | 3.368    |
| C(8)  | H(6) <sup>7)</sup>  | 3.599    | C(8)  | H(8)                | 2.110    |
| C(8)  | H(10)               | 2.124    | C(8)  | H(15) <sup>7)</sup> | 3.212    |
| C(8)  | H(25) <sup>3)</sup> | 3.074    | C(8)  | H(27) <sup>3)</sup> | 3.303    |
| C(8)  | H(30) <sup>6)</sup> | 3.284    | C(9)  | H(3) <sup>6)</sup>  | 3.582    |
| C(9)  | H(5) <sup>3)</sup>  | 3.595    | C(9)  | H(7)                | 2.520    |
| C(9)  | H(8)                | 3.325    | C(9)  | H(9)                | 2.078    |
| C(9)  | H(25) <sup>3)</sup> | 3.123    | C(9)  | H(30) <sup>6)</sup> | 3.007    |
| C(10) | H(8)                | 2.689    | C(10) | H(11)               | 2.055    |
| C(10) | H(12)               | 2.064    | C(10) | H(13)               | 2.054    |
| C(10) | H(14)               | 2.054    | C(10) | H(15)               | 2.058    |
| C(10) | H(16)               | 2.061    | C(10) | H(17)               | 2.055    |
| C(10) | H(18)               | 2.058    | C(10) | H(19)               | 2.057    |
| C(11) | H(4) <sup>5)</sup>  | 3.503    | C(11) | H(8) <sup>8)</sup>  | 3.569    |
| C(11) | H(14)               | 2.708    | C(11) | H(15)               | 2.679    |
| C(11) | H(15) <sup>5)</sup> | 3.513    | C(11) | H(16)               | 3.340    |
| C(11) | H(17)               | 2.607    | C(11) | H(18)               | 2.692    |
| C(11) | H(19)               | 3.307    | C(11) | H(26) <sup>3)</sup> | 3.564    |
| C(11) | H(28) <sup>9)</sup> | 3.322    | C(12) | H(8) <sup>1)</sup>  | 3.042    |
| C(12) | H(9) <sup>1)</sup>  | 3.328    | C(12) | H(11)               | 2.729    |
| C(12) | H(12)               | 3.340    | C(12) | H(13)               | 2.654    |
| C(12) | H(13) <sup>5)</sup> | 3.483    | C(12) | H(17)               | 3.296    |
| C(12) | H(18)               | 2.588    | C(12) | H(19)               | 2.689    |
| C(12) | H(27) <sup>6)</sup> | 3.334    | C(13) | H(1) <sup>10)</sup> | 3.273    |
| C(13) | H(4) <sup>5)</sup>  | 3.575    | C(13) | H(8)                | 2.369    |
| C(13) | H(11)               | 2.587    | C(13) | H(12)               | 2.721    |
| C(13) | H(13)               | 3.302    | C(13) | H(14)               | 2.594    |

Table 10. Distances beyond the asymmetric unit out to 3.60 Å involving hydrogens (continued)

| atom  | atom                 | distance | atom  | atom                 | distance |
|-------|----------------------|----------|-------|----------------------|----------|
| C(13) | H(15)                | 3.298    | C(13) | H(16)                | 2.679    |
| C(13) | H(20) <sup>9)</sup>  | 3.432    | C(13) | H(23) <sup>9)</sup>  | 3.488    |
| C(13) | H(24) <sup>11)</sup> | 3.345    | C(14) | H(6)                 | 3.465    |
| C(14) | H(7)                 | 2.468    | C(14) | H(21)                | 2.029    |
| C(14) | H(22)                | 2.041    | C(14) | H(23)                | 2.693    |
| C(14) | H(24)                | 3.319    | C(14) | H(25)                | 3.251    |
| C(14) | H(27)                | 3.312    | C(14) | H(28)                | 2.705    |
| C(14) | H(29)                | 2.031    | C(14) | H(30)                | 2.037    |
| C(15) | H(2) <sup>4)</sup>   | 3.326    | C(15) | H(6)                 | 3.124    |
| C(15) | H(7)                 | 3.341    | C(15) | H(10) <sup>1)</sup>  | 3.576    |
| C(15) | H(20)                | 2.067    | C(15) | H(23)                | 2.036    |
| C(15) | H(24)                | 2.052    | C(15) | H(25)                | 2.713    |
| C(15) | H(26)                | 3.329    | C(15) | H(28)                | 3.256    |
| C(15) | H(29)                | 2.694    | C(15) | H(30)                | 3.315    |
| C(16) | H(2) <sup>4)</sup>   | 3.371    | C(16) | H(16) <sup>12)</sup> | 3.541    |
| C(16) | H(17) <sup>13)</sup> | 3.489    | C(16) | H(19) <sup>12)</sup> | 3.569    |
| C(16) | H(20)                | 2.706    | C(16) | H(21)                | 2.040    |
| C(16) | H(22)                | 2.070    | C(16) | H(25)                | 2.018    |
| C(16) | H(26)                | 2.032    | C(16) | H(27)                | 3.298    |
| C(16) | H(28)                | 2.697    | C(16) | H(29)                | 3.236    |
| C(17) | H(12) <sup>4)</sup>  | 3.233    | C(17) | H(20)                | 3.254    |
| C(17) | H(21)                | 2.708    | C(17) | H(22)                | 3.335    |
| C(17) | H(23)                | 2.022    | C(17) | H(24)                | 2.033    |
| C(17) | H(26) <sup>14)</sup> | 3.485    | C(17) | H(27)                | 2.025    |
| C(17) | H(28)                | 2.019    | C(17) | H(29)                | 2.708    |
| C(17) | H(30)                | 3.316    | C(18) | H(16) <sup>2)</sup>  | 3.366    |
| C(18) | H(20)                | 2.719    | C(18) | H(21)                | 3.230    |
| C(18) | H(23)                | 2.690    | C(18) | H(24)                | 3.300    |
| C(18) | H(25)                | 2.017    | C(18) | H(26)                | 2.028    |
| C(18) | H(29)                | 2.041    | C(18) | H(30)                | 2.051    |
| C(19) | H(3)                 | 3.196    | C(19) | H(20)                | 2.087    |
| C(19) | H(21)                | 2.685    | C(19) | H(22)                | 3.318    |
| C(19) | H(23)                | 3.238    | C(19) | H(25)                | 2.702    |
| C(19) | H(26)                | 3.316    | C(19) | H(27)                | 2.036    |
| C(19) | H(28)                | 2.039    | H(1)  | Al(1)                | 2.442    |
| H(1)  | O(1)                 | 3.262    | H(1)  | C(2)                 | 3.544    |
| H(1)  | C(13) <sup>8)</sup>  | 3.273    | H(1)  | H(2)                 | 1.551    |

Table 10. Distances beyond the asymmetric unit out to 3.60 Å involving hydrogens (continued)

| atom | atom                | distance | atom | atom                | distance |
|------|---------------------|----------|------|---------------------|----------|
| H(1) | H(3)                | 1.551    | H(1) | H(5)                | 3.447    |
| H(1) | H(7) <sup>2)</sup>  | 3.251    | H(1) | H(13)               | 3.129    |
| H(1) | H(14) <sup>5)</sup> | 3.178    | H(1) | H(17) <sup>8)</sup> | 3.136    |
| H(1) | H(18) <sup>8)</sup> | 3.258    | H(1) | H(19) <sup>8)</sup> | 2.887    |
| H(1) | H(20) <sup>2)</sup> | 3.519    | H(1) | H(22) <sup>2)</sup> | 3.167    |
| H(1) | H(24) <sup>3)</sup> | 3.389    | H(2) | Al(1)               | 2.439    |
| H(2) | O(1)                | 3.211    | H(2) | N(1)                | 3.191    |
| H(2) | C(3)                | 3.576    | H(2) | C(15) <sup>3)</sup> | 3.326    |
| H(2) | C(16) <sup>3)</sup> | 3.371    | H(2) | H(1)                | 1.551    |
| H(2) | H(3)                | 1.551    | H(2) | H(6) <sup>3)</sup>  | 3.465    |
| H(2) | H(7) <sup>2)</sup>  | 3.214    | H(2) | H(10) <sup>2)</sup> | 3.315    |
| H(2) | H(19) <sup>8)</sup> | 3.545    | H(2) | H(21) <sup>3)</sup> | 2.723    |
| H(2) | H(22) <sup>3)</sup> | 3.488    | H(2) | H(24) <sup>3)</sup> | 2.748    |
| H(2) | H(25) <sup>3)</sup> | 3.447    | H(2) | H(30)               | 3.311    |
| H(3) | Al(1)               | 2.441    | H(3) | N(1)                | 3.409    |
| H(3) | C(2)                | 3.464    | H(3) | C(4) <sup>2)</sup>  | 3.536    |
| H(3) | C(5) <sup>2)</sup>  | 2.943    | H(3) | C(9) <sup>2)</sup>  | 3.582    |
| H(3) | C(19)               | 3.196    | H(3) | H(1)                | 1.551    |
| H(3) | H(2)                | 1.551    | H(3) | H(5)                | 3.206    |
| H(3) | H(7) <sup>2)</sup>  | 2.369    | H(3) | H(10) <sup>2)</sup> | 3.198    |
| H(3) | H(20) <sup>2)</sup> | 3.372    | H(3) | H(22) <sup>2)</sup> | 2.879    |
| H(3) | H(29)               | 2.799    | H(3) | H(30)               | 2.775    |
| H(4) | Al(1)               | 2.445    | H(4) | O(1)                | 3.072    |
| H(4) | C(8) <sup>1)</sup>  | 3.368    | H(4) | C(11) <sup>5)</sup> | 3.503    |
| H(4) | C(13) <sup>5)</sup> | 3.575    | H(4) | H(5)                | 1.551    |
| H(4) | H(6)                | 1.551    | H(4) | H(7) <sup>4)</sup>  | 3.412    |
| H(4) | H(9) <sup>1)</sup>  | 2.680    | H(4) | H(11) <sup>5)</sup> | 2.596    |
| H(4) | H(14) <sup>5)</sup> | 3.281    | H(4) | H(18) <sup>5)</sup> | 2.749    |
| H(4) | H(20) <sup>4)</sup> | 3.076    | H(4) | H(30) <sup>4)</sup> | 3.307    |
| H(5) | Al(1)               | 2.447    | H(5) | C(1)                | 3.300    |
| H(5) | C(5) <sup>4)</sup>  | 3.176    | H(5) | C(9) <sup>4)</sup>  | 3.595    |
| H(5) | H(1)                | 3.447    | H(5) | H(3)                | 3.206    |
| H(5) | H(4)                | 1.551    | H(5) | H(6)                | 1.551    |
| H(5) | H(7) <sup>4)</sup>  | 2.595    | H(5) | H(10) <sup>4)</sup> | 2.965    |
| H(5) | H(18) <sup>5)</sup> | 3.029    | H(5) | H(20) <sup>4)</sup> | 3.269    |
| H(5) | H(21)               | 3.425    | H(5) | H(22) <sup>2)</sup> | 3.270    |
| H(5) | H(29)               | 2.943    | H(6) | Al(1)               | 2.437    |

Table 10. Distances beyond the asymmetric unit out to 3.60 Å involving hydrogens (continued)

| atom  | atom                 | distance | atom  | atom                 | distance |
|-------|----------------------|----------|-------|----------------------|----------|
| H(6)  | O(1)                 | 3.497    | H(6)  | N(1)                 | 3.174    |
| H(6)  | C(5) <sup>4)</sup>   | 3.356    | H(6)  | C(8) <sup>1)</sup>   | 3.599    |
| H(6)  | C(14)                | 3.465    | H(6)  | C(15)                | 3.124    |
| H(6)  | H(2) <sup>4)</sup>   | 3.465    | H(6)  | H(4)                 | 1.551    |
| H(6)  | H(5)                 | 1.551    | H(6)  | H(7) <sup>4)</sup>   | 3.193    |
| H(6)  | H(9) <sup>1)</sup>   | 3.030    | H(6)  | H(10) <sup>1)</sup>  | 3.177    |
| H(6)  | H(20) <sup>4)</sup>  | 3.399    | H(6)  | H(21)                | 2.275    |
| H(6)  | H(22)                | 3.503    | H(6)  | H(29)                | 3.016    |
| H(6)  | H(30) <sup>4)</sup>  | 3.166    | H(7)  | N(1)                 | 1.985    |
| H(7)  | C(1) <sup>6)</sup>   | 3.085    | H(7)  | C(2) <sup>3)</sup>   | 3.222    |
| H(7)  | C(3)                 | 3.378    | H(7)  | C(4)                 | 2.085    |
| H(7)  | C(9)                 | 2.520    | H(7)  | C(14)                | 2.468    |
| H(7)  | C(15)                | 3.341    | H(7)  | H(1) <sup>6)</sup>   | 3.251    |
| H(7)  | H(2) <sup>6)</sup>   | 3.214    | H(7)  | H(3) <sup>6)</sup>   | 2.369    |
| H(7)  | H(4) <sup>3)</sup>   | 3.412    | H(7)  | H(5) <sup>3)</sup>   | 2.595    |
| H(7)  | H(6) <sup>3)</sup>   | 3.193    | H(7)  | H(10)                | 2.271    |
| H(7)  | H(18) <sup>13)</sup> | 3.510    | H(7)  | H(20)                | 2.066    |
| H(7)  | H(22)                | 3.080    | H(8)  | C(3)                 | 3.329    |
| H(8)  | C(6)                 | 2.079    | H(8)  | C(8)                 | 2.110    |
| H(8)  | C(9)                 | 3.325    | H(8)  | C(10)                | 2.689    |
| H(8)  | C(11) <sup>10)</sup> | 3.569    | H(8)  | C(12) <sup>7)</sup>  | 3.042    |
| H(8)  | C(13)                | 2.369    | H(8)  | H(9)                 | 2.450    |
| H(8)  | H(11) <sup>10)</sup> | 3.211    | H(8)  | H(12) <sup>10)</sup> | 3.552    |
| H(8)  | H(13) <sup>10)</sup> | 3.369    | H(8)  | H(14) <sup>7)</sup>  | 3.127    |
| H(8)  | H(15) <sup>7)</sup>  | 2.687    | H(8)  | H(16) <sup>7)</sup>  | 2.814    |
| H(8)  | H(17)                | 2.216    | H(8)  | H(18)                | 3.297    |
| H(8)  | H(19)                | 2.053    | H(8)  | H(25) <sup>3)</sup>  | 3.568    |
| H(8)  | H(26) <sup>3)</sup>  | 3.567    | H(9)  | Al(1) <sup>7)</sup>  | 3.428    |
| H(9)  | O(1) <sup>7)</sup>   | 2.720    | H(9)  | C(2) <sup>7)</sup>   | 3.115    |
| H(9)  | C(3) <sup>7)</sup>   | 3.472    | H(9)  | C(4)                 | 3.336    |
| H(9)  | C(6)                 | 3.387    | H(9)  | C(7)                 | 2.124    |
| H(9)  | C(9)                 | 2.078    | H(9)  | C(12) <sup>7)</sup>  | 3.328    |
| H(9)  | H(4) <sup>7)</sup>   | 2.680    | H(9)  | H(6) <sup>7)</sup>   | 3.030    |
| H(9)  | H(8)                 | 2.450    | H(9)  | H(10)                | 2.411    |
| H(9)  | H(11) <sup>10)</sup> | 3.305    | H(9)  | H(15) <sup>7)</sup>  | 2.546    |
| H(9)  | H(16) <sup>7)</sup>  | 3.296    | H(9)  | H(27) <sup>3)</sup>  | 3.182    |
| H(10) | C(3)                 | 3.419    | H(10) | C(4)                 | 2.154    |

Table 10. Distances beyond the asymmetric unit out to 3.60 Å involving hydrogens (continued)

| atom  | atom                | distance | atom  | atom                | distance |
|-------|---------------------|----------|-------|---------------------|----------|
| H(10) | C(5)                | 2.614    | H(10) | C(7)                | 3.361    |
| H(10) | C(8)                | 2.124    | H(10) | C(15) <sup>7)</sup> | 3.576    |
| H(10) | H(2) <sup>6)</sup>  | 3.315    | H(10) | H(3) <sup>6)</sup>  | 3.198    |
| H(10) | H(5) <sup>3)</sup>  | 2.965    | H(10) | H(6) <sup>7)</sup>  | 3.177    |
| H(10) | H(7)                | 2.271    | H(10) | H(9)                | 2.411    |
| H(10) | H(21) <sup>7)</sup> | 3.160    | H(10) | H(22) <sup>7)</sup> | 3.093    |
| H(10) | H(29) <sup>3)</sup> | 3.437    | H(10) | H(30) <sup>6)</sup> | 3.202    |
| H(11) | C(2) <sup>5)</sup>  | 3.524    | H(11) | C(6)                | 3.332    |
| H(11) | C(10)               | 2.055    | H(11) | C(12)               | 2.729    |
| H(11) | C(13)               | 2.587    | H(11) | H(4) <sup>5)</sup>  | 2.596    |
| H(11) | H(8) <sup>8)</sup>  | 3.211    | H(11) | H(9) <sup>8)</sup>  | 3.305    |
| H(11) | H(12)               | 1.551    | H(11) | H(13)               | 1.551    |
| H(11) | H(14)               | 2.575    | H(11) | H(15)               | 2.990    |
| H(11) | H(15) <sup>5)</sup> | 3.046    | H(11) | H(16)               | 3.593    |
| H(11) | H(17)               | 2.758    | H(11) | H(18)               | 2.452    |
| H(11) | H(19)               | 3.486    | H(11) | H(28) <sup>9)</sup> | 3.022    |
| H(12) | O(1)                | 3.429    | H(12) | C(3)                | 3.262    |
| H(12) | C(6)                | 2.651    | H(12) | C(7)                | 3.479    |
| H(12) | C(10)               | 2.064    | H(12) | C(12)               | 3.340    |
| H(12) | C(13)               | 2.721    | H(12) | C(17) <sup>3)</sup> | 3.233    |
| H(12) | H(8) <sup>8)</sup>  | 3.552    | H(12) | H(11)               | 1.551    |
| H(12) | H(13)               | 1.551    | H(12) | H(14)               | 3.586    |
| H(12) | H(15)               | 3.531    | H(12) | H(17)               | 2.505    |
| H(12) | H(18)               | 3.067    | H(12) | H(19)               | 3.555    |
| H(12) | H(19) <sup>8)</sup> | 3.432    | H(12) | H(24) <sup>3)</sup> | 3.150    |
| H(12) | H(25) <sup>3)</sup> | 3.098    | H(12) | H(26) <sup>3)</sup> | 2.674    |
| H(12) | H(28) <sup>9)</sup> | 2.758    | H(13) | Al(1)               | 3.481    |
| H(13) | O(1)                | 2.442    | H(13) | C(1)                | 3.580    |
| H(13) | C(3)                | 2.869    | H(13) | C(6)                | 2.737    |
| H(13) | C(10)               | 2.054    | H(13) | C(12)               | 2.654    |
| H(13) | C(12) <sup>5)</sup> | 3.483    | H(13) | C(13)               | 3.302    |
| H(13) | H(1)                | 3.129    | H(13) | H(8) <sup>8)</sup>  | 3.369    |
| H(13) | H(11)               | 1.551    | H(13) | H(12)               | 1.551    |
| H(13) | H(14)               | 2.926    | H(13) | H(14) <sup>5)</sup> | 2.989    |
| H(13) | H(15)               | 2.465    | H(13) | H(15) <sup>5)</sup> | 3.083    |
| H(13) | H(16)               | 3.521    | H(13) | H(17)               | 3.508    |
| H(13) | H(18)               | 3.515    | H(13) | H(19) <sup>8)</sup> | 3.562    |



Table 10. Distances beyond the asymmetric unit out to 3.60 Å involving hydrogens (continued)

| atom  | atom                 | distance | atom  | atom                 | distance |
|-------|----------------------|----------|-------|----------------------|----------|
| H(14) | C(6)                 | 3.335    | H(14) | C(10)                | 2.054    |
| H(14) | C(11)                | 2.708    | H(14) | C(13)                | 2.594    |
| H(14) | H(1) <sup>5)</sup>   | 3.178    | H(14) | H(4) <sup>5)</sup>   | 3.281    |
| H(14) | H(8) <sup>1)</sup>   | 3.127    | H(14) | H(11)                | 2.575    |
| H(14) | H(12)                | 3.586    | H(14) | H(13)                | 2.926    |
| H(14) | H(13) <sup>5)</sup>  | 2.989    | H(14) | H(15)                | 1.551    |
| H(14) | H(16)                | 1.551    | H(14) | H(17)                | 3.447    |
| H(14) | H(18)                | 2.352    | H(14) | H(19)                | 2.914    |
| H(14) | H(23) <sup>11)</sup> | 3.398    | H(15) | O(1)                 | 2.408    |
| H(15) | C(3)                 | 2.879    | H(15) | C(6)                 | 2.724    |
| H(15) | C(7) <sup>1)</sup>   | 3.299    | H(15) | C(8) <sup>1)</sup>   | 3.212    |
| H(15) | C(10)                | 2.058    | H(15) | C(11)                | 2.679    |
| H(15) | C(11) <sup>5)</sup>  | 3.513    | H(15) | C(13)                | 3.298    |
| H(15) | H(8) <sup>1)</sup>   | 2.687    | H(15) | H(9) <sup>1)</sup>   | 2.546    |
| H(15) | H(11)                | 2.990    | H(15) | H(11) <sup>5)</sup>  | 3.046    |
| H(15) | H(12)                | 3.531    | H(15) | H(13)                | 2.465    |
| H(15) | H(13) <sup>5)</sup>  | 3.083    | H(15) | H(14)                | 1.551    |
| H(15) | H(16)                | 1.551    | H(15) | H(18)                | 3.452    |
| H(15) | H(19)                | 3.566    | H(15) | H(27) <sup>6)</sup>  | 3.377    |
| H(16) | O(1)                 | 3.440    | H(16) | C(3)                 | 3.340    |
| H(16) | C(6)                 | 2.674    | H(16) | C(7)                 | 3.507    |
| H(16) | C(7) <sup>1)</sup>   | 3.452    | H(16) | C(10)                | 2.061    |
| H(16) | C(11)                | 3.340    | H(16) | C(13)                | 2.679    |
| H(16) | C(16) <sup>11)</sup> | 3.541    | H(16) | C(18) <sup>6)</sup>  | 3.366    |
| H(16) | H(8) <sup>1)</sup>   | 2.814    | H(16) | H(9) <sup>1)</sup>   | 3.296    |
| H(16) | H(11)                | 3.593    | H(16) | H(13)                | 3.521    |
| H(16) | H(14)                | 1.551    | H(16) | H(15)                | 1.551    |
| H(16) | H(17)                | 3.562    | H(16) | H(17) <sup>1)</sup>  | 3.573    |
| H(16) | H(18)                | 2.884    | H(16) | H(19)                | 2.551    |
| H(16) | H(23) <sup>11)</sup> | 2.986    | H(16) | H(24) <sup>11)</sup> | 3.206    |
| H(16) | H(26) <sup>6)</sup>  | 3.379    | H(16) | H(27) <sup>6)</sup>  | 2.620    |
| H(16) | H(28) <sup>6)</sup>  | 3.458    | H(17) | C(6)                 | 2.764    |
| H(17) | C(7)                 | 2.808    | H(17) | C(10)                | 2.055    |
| H(17) | C(11)                | 2.607    | H(17) | C(12)                | 3.296    |
| H(17) | C(16) <sup>9)</sup>  | 3.489    | H(17) | H(1) <sup>10)</sup>  | 3.136    |
| H(17) | H(8)                 | 2.216    | H(17) | H(11)                | 2.758    |
| H(17) | H(12)                | 2.505    | H(17) | H(13)                | 3.508    |

Table 10. Distances beyond the asymmetric unit out to 3.60 Å involving hydrogens (continued)

| atom  | atom                 | distance | atom  | atom                 | distance |
|-------|----------------------|----------|-------|----------------------|----------|
| H(17) | H(14)                | 3.447    | H(17) | H(16)                | 3.562    |
| H(17) | H(16) <sup>7)</sup>  | 3.573    | H(17) | H(18)                | 1.551    |
| H(17) | H(19)                | 1.551    | H(17) | H(20) <sup>9)</sup>  | 3.000    |
| H(17) | H(23) <sup>9)</sup>  | 2.574    | H(17) | H(26) <sup>3)</sup>  | 3.424    |
| H(17) | H(28) <sup>9)</sup>  | 3.248    | H(18) | C(2) <sup>5)</sup>   | 3.321    |
| H(18) | C(6)                 | 3.353    | H(18) | C(10)                | 2.058    |
| H(18) | C(11)                | 2.692    | H(18) | C(12)                | 2.588    |
| H(18) | H(1) <sup>10)</sup>  | 3.258    | H(18) | H(4) <sup>5)</sup>   | 2.749    |
| H(18) | H(5) <sup>5)</sup>   | 3.029    | H(18) | H(7) <sup>9)</sup>   | 3.510    |
| H(18) | H(8)                 | 3.297    | H(18) | H(11)                | 2.452    |
| H(18) | H(12)                | 3.067    | H(18) | H(13)                | 3.515    |
| H(18) | H(14)                | 2.352    | H(18) | H(15)                | 3.452    |
| H(18) | H(16)                | 2.884    | H(18) | H(17)                | 1.551    |
| H(18) | H(19)                | 1.551    | H(18) | H(20) <sup>9)</sup>  | 2.976    |
| H(18) | H(24) <sup>11)</sup> | 3.157    | H(19) | C(6)                 | 2.678    |
| H(19) | C(7)                 | 2.664    | H(19) | C(10)                | 2.057    |
| H(19) | C(11)                | 3.307    | H(19) | C(12)                | 2.689    |
| H(19) | C(16) <sup>11)</sup> | 3.569    | H(19) | H(1) <sup>10)</sup>  | 2.887    |
| H(19) | H(2) <sup>10)</sup>  | 3.545    | H(19) | H(8)                 | 2.053    |
| H(19) | H(11)                | 3.486    | H(19) | H(12)                | 3.555    |
| H(19) | H(12) <sup>10)</sup> | 3.432    | H(19) | H(13) <sup>10)</sup> | 3.562    |
| H(19) | H(14)                | 2.914    | H(19) | H(15)                | 3.566    |
| H(19) | H(16)                | 2.551    | H(19) | H(17)                | 1.551    |
| H(19) | H(18)                | 1.551    | H(19) | H(24) <sup>11)</sup> | 2.696    |
| H(20) | N(1)                 | 2.033    | H(20) | C(2) <sup>3)</sup>   | 3.435    |
| H(20) | C(5)                 | 2.381    | H(20) | C(13) <sup>13)</sup> | 3.432    |
| H(20) | C(15)                | 2.067    | H(20) | C(16)                | 2.706    |
| H(20) | C(17)                | 3.254    | H(20) | C(18)                | 2.719    |
| H(20) | C(19)                | 2.087    | H(20) | H(1) <sup>6)</sup>   | 3.519    |
| H(20) | H(3) <sup>6)</sup>   | 3.372    | H(20) | H(4) <sup>3)</sup>   | 3.076    |
| H(20) | H(5) <sup>3)</sup>   | 3.269    | H(20) | H(6) <sup>3)</sup>   | 3.399    |
| H(20) | H(7)                 | 2.066    | H(20) | H(17) <sup>13)</sup> | 3.000    |
| H(20) | H(18) <sup>13)</sup> | 2.976    | H(20) | H(21)                | 2.830    |
| H(20) | H(22)                | 2.330    | H(20) | H(23)                | 2.527    |
| H(20) | H(24)                | 3.572    | H(20) | H(27)                | 3.586    |
| H(20) | H(28)                | 2.556    | H(20) | H(29)                | 2.846    |
| H(20) | H(30)                | 2.350    | H(21) | Al(1)                | 3.419    |

Table 10. Distances beyond the asymmetric unit out to 3.60 Å involving hydrogens (continued)

| atom  | atom                 | distance | atom  | atom                 | distance |
|-------|----------------------|----------|-------|----------------------|----------|
| H(21) | N(1)                 | 2.657    | H(21) | C(2)                 | 3.046    |
| H(21) | C(14)                | 2.029    | H(21) | C(16)                | 2.040    |
| H(21) | C(17)                | 2.708    | H(21) | C(18)                | 3.230    |
| H(21) | C(19)                | 2.685    | H(21) | H(2) <sup>4)</sup>   | 2.723    |
| H(21) | H(5)                 | 3.425    | H(21) | H(6)                 | 2.275    |
| H(21) | H(10) <sup>1)</sup>  | 3.160    | H(21) | H(20)                | 2.830    |
| H(21) | H(22)                | 1.551    | H(21) | H(23)                | 2.787    |
| H(21) | H(24)                | 2.318    | H(21) | H(25)                | 2.562    |
| H(21) | H(26)                | 3.575    | H(21) | H(29)                | 2.529    |
| H(21) | H(30)                | 3.547    | H(22) | N(1)                 | 2.646    |
| H(22) | C(1) <sup>6)</sup>   | 3.428    | H(22) | C(5)                 | 3.112    |
| H(22) | C(14)                | 2.041    | H(22) | C(16)                | 2.070    |
| H(22) | C(17)                | 3.335    | H(22) | C(19)                | 3.318    |
| H(22) | H(1) <sup>6)</sup>   | 3.167    | H(22) | H(2) <sup>4)</sup>   | 3.488    |
| H(22) | H(3) <sup>6)</sup>   | 2.879    | H(22) | H(5) <sup>6)</sup>   | 3.270    |
| H(22) | H(6)                 | 3.503    | H(22) | H(7)                 | 3.080    |
| H(22) | H(10) <sup>1)</sup>  | 3.093    | H(22) | H(20)                | 2.330    |
| H(22) | H(21)                | 1.551    | H(22) | H(23)                | 2.328    |
| H(22) | H(24)                | 2.370    | H(22) | H(25)                | 3.580    |
| H(22) | H(29)                | 3.554    | H(23) | C(13) <sup>13)</sup> | 3.488    |
| H(23) | C(14)                | 2.693    | H(23) | C(15)                | 2.036    |
| H(23) | C(17)                | 2.022    | H(23) | C(18)                | 2.690    |
| H(23) | C(19)                | 3.238    | H(23) | H(14) <sup>12)</sup> | 3.398    |
| H(23) | H(16) <sup>12)</sup> | 2.986    | H(23) | H(17) <sup>13)</sup> | 2.574    |
| H(23) | H(20)                | 2.527    | H(23) | H(21)                | 2.787    |
| H(23) | H(22)                | 2.328    | H(23) | H(24)                | 1.551    |
| H(23) | H(25)                | 2.774    | H(23) | H(26)                | 2.295    |
| H(23) | H(26) <sup>14)</sup> | 3.227    | H(23) | H(27)                | 3.556    |
| H(23) | H(28)                | 2.555    | H(24) | C(1) <sup>4)</sup>   | 3.490    |
| H(24) | C(13) <sup>12)</sup> | 3.345    | H(24) | C(14)                | 3.319    |
| H(24) | C(15)                | 2.052    | H(24) | C(17)                | 2.033    |
| H(24) | C(18)                | 3.300    | H(24) | H(1) <sup>4)</sup>   | 3.389    |
| H(24) | H(2) <sup>4)</sup>   | 2.748    | H(24) | H(12) <sup>4)</sup>  | 3.150    |
| H(24) | H(16) <sup>12)</sup> | 3.206    | H(24) | H(18) <sup>12)</sup> | 3.157    |
| H(24) | H(19) <sup>12)</sup> | 2.696    | H(24) | H(20)                | 3.572    |
| H(24) | H(21)                | 2.318    | H(24) | H(22)                | 2.370    |
| H(24) | H(23)                | 1.551    | H(24) | H(25)                | 2.290    |

Table 10. Distances beyond the asymmetric unit out to 3.60 Å involving hydrogens (continued)

| atom  | atom                 | distance | atom  | atom                 | distance |
|-------|----------------------|----------|-------|----------------------|----------|
| H(24) | H(26)                | 2.335    | H(24) | H(28)                | 3.561    |
| H(25) | C(3) <sup>4)</sup>   | 3.160    | H(25) | C(4) <sup>4)</sup>   | 3.159    |
| H(25) | C(6) <sup>4)</sup>   | 3.108    | H(25) | C(7) <sup>4)</sup>   | 3.045    |
| H(25) | C(8) <sup>4)</sup>   | 3.074    | H(25) | C(9) <sup>4)</sup>   | 3.123    |
| H(25) | C(14)                | 3.251    | H(25) | C(15)                | 2.713    |
| H(25) | C(16)                | 2.018    | H(25) | C(18)                | 2.017    |
| H(25) | C(19)                | 2.702    | H(25) | H(2) <sup>4)</sup>   | 3.447    |
| H(25) | H(8) <sup>4)</sup>   | 3.568    | H(25) | H(12) <sup>4)</sup>  | 3.098    |
| H(25) | H(21)                | 2.562    | H(25) | H(22)                | 3.580    |
| H(25) | H(23)                | 2.774    | H(25) | H(24)                | 2.290    |
| H(25) | H(26)                | 1.551    | H(25) | H(27)                | 2.281    |
| H(25) | H(28)                | 2.772    | H(25) | H(29)                | 2.564    |
| H(25) | H(30)                | 3.567    | H(26) | C(6) <sup>4)</sup>   | 3.592    |
| H(26) | C(7) <sup>4)</sup>   | 3.472    | H(26) | C(11) <sup>4)</sup>  | 3.564    |
| H(26) | C(15)                | 3.329    | H(26) | C(16)                | 2.032    |
| H(26) | C(17) <sup>14)</sup> | 3.485    | H(26) | C(18)                | 2.028    |
| H(26) | C(19)                | 3.316    | H(26) | H(8) <sup>4)</sup>   | 3.567    |
| H(26) | H(12) <sup>4)</sup>  | 2.674    | H(26) | H(16) <sup>2)</sup>  | 3.379    |
| H(26) | H(17) <sup>4)</sup>  | 3.424    | H(26) | H(21)                | 3.575    |
| H(26) | H(23)                | 2.295    | H(26) | H(23) <sup>14)</sup> | 3.227    |
| H(26) | H(24)                | 2.335    | H(26) | H(25)                | 1.551    |
| H(26) | H(26) <sup>14)</sup> | 2.745    | H(26) | H(27)                | 2.330    |
| H(26) | H(28)                | 2.286    | H(26) | H(28) <sup>14)</sup> | 3.424    |
| H(26) | H(29)                | 3.575    | H(27) | C(3) <sup>2)</sup>   | 3.263    |
| H(27) | C(6) <sup>2)</sup>   | 3.182    | H(27) | C(7) <sup>2)</sup>   | 3.435    |
| H(27) | C(8) <sup>4)</sup>   | 3.303    | H(27) | C(12) <sup>2)</sup>  | 3.334    |
| H(27) | C(14)                | 3.312    | H(27) | C(16)                | 3.298    |
| H(27) | C(17)                | 2.025    | H(27) | C(19)                | 2.036    |
| H(27) | H(9) <sup>4)</sup>   | 3.182    | H(27) | H(15) <sup>2)</sup>  | 3.377    |
| H(27) | H(16) <sup>2)</sup>  | 2.620    | H(27) | H(20)                | 3.586    |
| H(27) | H(23)                | 3.556    | H(27) | H(25)                | 2.281    |
| H(27) | H(26)                | 2.330    | H(27) | H(28)                | 1.551    |
| H(27) | H(29)                | 2.305    | H(27) | H(30)                | 2.346    |
| H(28) | C(7) <sup>2)</sup>   | 3.582    | H(28) | C(11) <sup>13)</sup> | 3.322    |
| H(28) | C(14)                | 2.705    | H(28) | C(15)                | 3.256    |
| H(28) | C(16)                | 2.697    | H(28) | C(17)                | 2.019    |
| H(28) | C(19)                | 2.039    | H(28) | H(11) <sup>13)</sup> | 3.022    |

Table 10. Distances beyond the asymmetric unit out to 3.60 Å involving hydrogens (continued)

| atom  | atom                 | distance | atom  | atom                | distance |
|-------|----------------------|----------|-------|---------------------|----------|
| H(28) | H(12) <sup>13)</sup> | 2.758    | H(28) | H(16) <sup>2)</sup> | 3.458    |
| H(28) | H(17) <sup>13)</sup> | 3.248    | H(28) | H(20)               | 2.556    |
| H(28) | H(23)                | 2.555    | H(28) | H(24)               | 3.561    |
| H(28) | H(25)                | 2.772    | H(28) | H(26)               | 2.286    |
| H(28) | H(26) <sup>14)</sup> | 3.424    | H(28) | H(27)               | 1.551    |
| H(28) | H(29)                | 2.794    | H(28) | H(30)               | 2.315    |
| H(29) | Al(1)                | 2.927    | H(29) | N(1)                | 2.656    |
| H(29) | C(1)                 | 3.304    | H(29) | C(2)                | 3.118    |
| H(29) | C(14)                | 2.031    | H(29) | C(15)               | 2.694    |
| H(29) | C(16)                | 3.236    | H(29) | C(17)               | 2.708    |
| H(29) | C(18)                | 2.041    | H(29) | H(3)                | 2.799    |
| H(29) | H(5)                 | 2.943    | H(29) | H(6)                | 3.016    |
| H(29) | H(10) <sup>4)</sup>  | 3.437    | H(29) | H(20)               | 2.846    |
| H(29) | H(21)                | 2.529    | H(29) | H(22)               | 3.554    |
| H(29) | H(25)                | 2.564    | H(29) | H(26)               | 3.575    |
| H(29) | H(27)                | 2.305    | H(29) | H(28)               | 2.794    |
| H(29) | H(30)                | 1.551    | H(30) | Al(1)               | 3.411    |
| H(30) | N(1)                 | 2.650    | H(30) | C(1)                | 3.265    |
| H(30) | C(4) <sup>2)</sup>   | 3.352    | H(30) | C(5)                | 3.533    |
| H(30) | C(8) <sup>2)</sup>   | 3.284    | H(30) | C(9) <sup>2)</sup>  | 3.007    |
| H(30) | C(14)                | 2.037    | H(30) | C(15)               | 3.315    |
| H(30) | C(17)                | 3.316    | H(30) | C(18)               | 2.051    |
| H(30) | H(2)                 | 3.311    | H(30) | H(3)                | 2.775    |
| H(30) | H(4) <sup>3)</sup>   | 3.307    | H(30) | H(6) <sup>3)</sup>  | 3.166    |
| H(30) | H(10) <sup>2)</sup>  | 3.202    | H(30) | H(20)               | 2.350    |
| H(30) | H(21)                | 3.547    | H(30) | H(25)               | 3.567    |
| H(30) | H(27)                | 2.346    | H(30) | H(28)               | 2.315    |
| H(30) | H(29)                | 1.551    |       |                     |          |

Symmetry Operators:

- |                             |                               |
|-----------------------------|-------------------------------|
| (1) $-X+1/2, Y+1/2-1, Z$    | (2) $X+1/2, Y, -Z+1/2+1$      |
| (3) $-X+1, Y+1/2, -Z+1/2+1$ | (4) $-X+1, Y+1/2-1, -Z+1/2+1$ |
| (5) $-X+1, -Y, -Z+1$        | (6) $X+1/2-1, Y, -Z+1/2+1$    |
| (7) $-X+1/2, Y+1/2, Z$      | (8) $X+1/2, -Y+1/2, -Z+1$     |
| (9) $X, -Y+1/2, Z+1/2-1$    | (10) $X+1/2-1, -Y+1/2, -Z+1$  |
| (11) $-X+1/2, -Y, Z+1/2-1$  | (12) $-X+1/2, -Y, Z+1/2$      |
| (13) $X, -Y+1/2, Z+1/2$     | (14) $-X+1, -Y, -Z+2$         |

X-ray Structure Report for  $\text{Me}_2\text{Al}[\text{O}-2\text{-}^t\text{Bu}-6\text{-(PhN=CH)C}_6\text{H}_3]$  (**2e**)

May 10, 2007

## Experimental

### Data Collection

A yellow block crystal of C<sub>19</sub>H<sub>24</sub>NOAl having approximate dimensions of 0.40 x 0.24 x 0.24 mm was mounted on a glass fiber. All measurements were made on a Rigaku RAXIS RAPID imaging plate area detector with graphite monochromated Mo-K $\alpha$  radiation.

Indexing was performed from 3 oscillations that were exposed for 360 seconds. The crystal-to-detector distance was 127.40 mm.

Cell constants and an orientation matrix for data collection corresponded to a primitive monoclinic cell with dimensions:

$$\begin{aligned} a &= 12.1416(5) \text{ \AA} \\ b &= 7.2786(3) \text{ \AA} & \beta &= 100.5986(13)^\circ \\ c &= 21.0147(9) \text{ \AA} \\ V &= 1825.47(13) \text{ \AA}^3 \end{aligned}$$

For  $Z = 4$  and F.W. = 309.39, the calculated density is 1.126 g/cm<sup>3</sup>. The systematic absences of:

$$\begin{aligned} h0l: & h+l \pm 2n \\ 0k0: & k \pm 2n \end{aligned}$$

uniquely determine the space group to be:

$$P2_1/n \text{ (#14)}$$

The data were collected at a temperature of  $-30 \pm 1^\circ\text{C}$  to a maximum  $2\theta$  value of  $54.9^\circ$ . A total of 44 oscillation images were collected. A sweep of data was done using  $\omega$  scans from  $130.0$  to  $190.0^\circ$  in  $5.0^\circ$  step, at  $\chi=45.0^\circ$  and  $\phi = 0.0^\circ$ . The exposure rate was  $180.0$  [sec./ $^\circ$ ]. A second sweep was performed using  $\omega$  scans from  $0.0$  to  $160.0^\circ$  in  $5.0^\circ$  step, at  $\chi=45.0^\circ$  and  $\phi = 180.0^\circ$ . The exposure rate was  $180.0$  [sec./ $^\circ$ ]. The crystal-to-detector distance was 127.40 mm. Readout was performed in the 0.100 mm pixel mode.

## Data Reduction

Of the 17113 reflections that were collected, 4157 were unique ( $R_{\text{int}} = 0.027$ ); equivalent reflections were merged.

The linear absorption coefficient,  $\mu$ , for Mo-K $\alpha$  radiation is 1.127 cm<sup>-1</sup>. An empirical absorption correction was applied which resulted in transmission factors ranging from 0.667 to 0.973. The data were corrected for Lorentz and polarization effects.

## Structure Solution and Refinement

The structure was solved by direct methods<sup>1</sup> and expanded using Fourier techniques<sup>2</sup>. The non-hydrogen atoms were refined anisotropically. Hydrogen atoms were refined using the riding model. The final cycle of full-matrix least-squares refinement<sup>3</sup> on  $F^2$  was based on 3154 observed reflections and 223 variable parameters and converged (largest parameter shift was 0.00 times its esd) with unweighted and weighted agreement factors of:

$$R1 = \sum ||F_o| - |F_c|| / \sum |F_o| = 0.0394$$

$$wR2 = [ \sum ( w (F_o^2 - F_c^2)^2 ) / \sum w(F_o^2)^2 ]^{1/2} = 0.1195$$

The standard deviation of an observation of unit weight<sup>4</sup> was 1.01. A Sheldrick weighting scheme was used. Plots of  $\sum w (|F_o| - |F_c|)^2$  versus  $|F_o|$ , reflection order in data collection,  $\sin \theta/\lambda$  and various classes of indices showed no unusual trends. The maximum and minimum peaks on the final difference Fourier map corresponded to 0.18 and -0.24 e<sup>-</sup>/Å<sup>3</sup>, respectively.

Neutral atom scattering factors were taken from Cromer and Waber<sup>5</sup>. Anomalous dispersion effects were included in  $F_{\text{calc}}$ <sup>6</sup>; the values for  $\Delta f'$  and  $\Delta f''$  were those of Creagh and McAuley<sup>7</sup>. The values for the mass attenuation coefficients are those of Creagh and Hubbell<sup>8</sup>. All calculations were performed using the CrystalStructure<sup>9,10</sup> crystallographic software package.



## References

(1) SIR92: Altomare, A., Cascarano, G., Giacovazzo, C., Guagliardi, A., Burla, M., Polidori, G., and Camalli, M. (1994) J. Appl. Cryst., 27, 435.

(2) DIRDIF99: Beurskens, P.T., Admiraal, G., Beurskens, G., Bosman, W.P., de Gelder, R., Israel, R. and Smits, J.M.M.(1999). The DIRDIF-99 program system, Technical Report of the Crystallography Laboratory, University of Nijmegen, The Netherlands.

(3) Least Squares function minimized:

$$\sum w(F_o^2 - F_c^2)^2 \quad \text{where } w = \text{Least Squares weights.}$$

(4) Standard deviation of an observation of unit weight:

$$[\sum w(F_o^2 - F_c^2)^2 / (N_o - N_v)]^{1/2}$$

where:  $N_o$  = number of observations  
 $N_v$  = number of variables

(5) Cromer, D. T. & Waber, J. T.; "International Tables for X-ray Crystallography", Vol. IV, The Kynoch Press, Birmingham, England, Table 2.2 A (1974).

(6) Ibers, J. A. & Hamilton, W. C.; Acta Crystallogr., 17, 781 (1964).

(7) Creagh, D. C. & McAuley, W.J. ; "International Tables for Crystallography", Vol C, (A.J.C. Wilson, ed.), Kluwer Academic Publishers, Boston, Table 4.2.6.8, pages 219-222 (1992).

(8) Creagh, D. C. & Hubbell, J.H.; "International Tables for Crystallography", Vol C, (A.J.C. Wilson, ed.), Kluwer Academic Publishers, Boston, Table 4.2.4.3, pages 200-206 (1992).

(9) CrystalStructure 3.8: Crystal Structure Analysis Package, Rigaku and Rigaku/MSO (2000-2006). 9009 New Trails Dr. The Woodlands TX 77381 USA.

(10) CRYSTALS Issue 11: Carruthers, J.R., Rollett, J.S., Betteridge, P.W., Kinna, D., Pearce, L., Larsen, A., and Gabe, E. Chemical Crystallography Laboratory, Oxford, UK. (1999)

## EXPERIMENTAL DETAILS

### A. Crystal Data

$\text{C}_{19}\text{H}_{24}\text{NOAl}$

|                         |                                                                                                                                                                |
|-------------------------|----------------------------------------------------------------------------------------------------------------------------------------------------------------|
| Formula Weight          | 309.39                                                                                                                                                         |
| Crystal Color, Habit    | yellow, block                                                                                                                                                  |
| Crystal Dimensions      | 0.40 X 0.24 X 0.24 mm                                                                                                                                          |
| Crystal System          | monoclinic                                                                                                                                                     |
| Lattice Type            | Primitive                                                                                                                                                      |
| Indexing Images         | 3 oscillations @ 360.0 seconds                                                                                                                                 |
| Detector Position       | 127.40 mm                                                                                                                                                      |
| Pixel Size              | 0.100 mm                                                                                                                                                       |
| Lattice Parameters      | $a = 12.1416(5) \text{ \AA}$<br>$b = 7.2786(3) \text{ \AA}$<br>$c = 21.0147(9) \text{ \AA}$<br>$\beta = 100.5986(13)^\circ$<br>$V = 1825.47(13) \text{ \AA}^3$ |
| Space Group             | $P2_1/n$ (#14)                                                                                                                                                 |
| Z value                 | 4                                                                                                                                                              |
| $D_{\text{calc}}$       | $1.126 \text{ g/cm}^3$                                                                                                                                         |
| $F_{000}$               | 664.00                                                                                                                                                         |
| $\mu(\text{MoK}\alpha)$ | $1.127 \text{ cm}^{-1}$                                                                                                                                        |

## B. Intensity Measurements

|                                                        |                                                                            |
|--------------------------------------------------------|----------------------------------------------------------------------------|
| Diffractometer                                         | Rigaku RAXIS-RAPID                                                         |
| Radiation                                              | MoK $\alpha$ ( $\lambda = 0.71075 \text{ \AA}$ )<br>graphite monochromated |
| Detector Aperture                                      | 280 mm x 256 mm                                                            |
| Data Images                                            | 44 exposures                                                               |
| $\omega$ oscillation Range ( $\chi=45.0, \phi=0.0$ )   | 130.0 - 190.0 $^\circ$                                                     |
| Exposure Rate                                          | 180.0 sec./ $^\circ$                                                       |
| $\omega$ oscillation Range ( $\chi=45.0, \phi=180.0$ ) | 0.0 - 160.0 $^\circ$                                                       |
| Exposure Rate                                          | 180.0 sec./ $^\circ$                                                       |
| Detector Position                                      | 127.40 mm                                                                  |
| Pixel Size                                             | 0.100 mm                                                                   |
| $2\theta_{\max}$                                       | 54.9 $^\circ$                                                              |
| No. of Reflections Measured                            | Total: 17113<br>Unique: 4157 ( $R_{\text{int}} = 0.027$ )                  |
| Corrections                                            | Lorentz-polarization<br>Absorption<br>(trans. factors: 0.667 - 0.973)      |

### C. Structure Solution and Refinement

|                                          |                                                |
|------------------------------------------|------------------------------------------------|
| Structure Solution                       | Direct Methods (SIR92)                         |
| Refinement                               | Full-matrix least-squares on $F^2$             |
| Function Minimized                       | $\sum w (F_o^2 - F_c^2)^2$                     |
| Least Squares Weights                    | $1/[0.0022F_o^2+1.0000\sigma(F_o^2)]/(4F_o^2)$ |
| $2\theta_{\max}$ cutoff                  | 54.9°                                          |
| Anomalous Dispersion                     | All non-hydrogen atoms                         |
| No. Observations ( $I > 2.00\sigma(I)$ ) | 3154                                           |
| No. Variables                            | 223                                            |
| Reflection/Parameter Ratio               | 14.14                                          |
| Residuals: R1 ( $I > 2.00\sigma(I)$ )    | 0.0394                                         |
| Residuals: wR2 ( $I > 2.00\sigma(I)$ )   | 0.1195                                         |
| Goodness of Fit Indicator                | 1.012                                          |
| Max Shift/Error in Final Cycle           | 0.000                                          |
| Maximum peak in Final Diff. Map          | 0.18 e <sup>-</sup> /Å <sup>3</sup>            |
| Minimum peak in Final Diff. Map          | -0.24 e <sup>-</sup> /Å <sup>3</sup>           |

Table 1. Atomic coordinates and  $B_{\text{iso}}/B_{\text{eq}}$

| atom  | x           | y           | z           | $B_{\text{eq}}$ |
|-------|-------------|-------------|-------------|-----------------|
| Al(1) | 0.47981(4)  | 0.10284(6)  | 0.37697(2)  | 2.924(10)       |
| O(1)  | 0.34219(8)  | 0.17874(17) | 0.38155(5)  | 3.54(2)         |
| N(1)  | 0.44849(10) | 0.09340(15) | 0.28071(6)  | 2.74(2)         |
| C(1)  | 0.59166(15) | 0.2922(2)   | 0.40498(9)  | 4.54(4)         |
| C(2)  | 0.50491(18) | -0.1466(2)  | 0.41182(9)  | 4.72(4)         |
| C(3)  | 0.24559(12) | 0.15283(19) | 0.34146(7)  | 2.70(2)         |
| C(4)  | 0.24513(12) | 0.10181(18) | 0.27628(7)  | 2.67(2)         |
| C(5)  | 0.34536(13) | 0.08369(18) | 0.24976(7)  | 2.76(2)         |
| C(6)  | 0.14248(12) | 0.1808(2)   | 0.36302(7)  | 2.93(2)         |
| C(7)  | 0.04476(12) | 0.1595(2)   | 0.31801(7)  | 3.25(3)         |
| C(8)  | 0.04348(13) | 0.1088(2)   | 0.25323(8)  | 3.44(3)         |
| C(9)  | 0.14235(13) | 0.07923(19) | 0.23279(7)  | 3.06(3)         |
| C(10) | 0.14099(14) | 0.2288(2)   | 0.43398(7)  | 3.75(3)         |
| C(11) | 0.20203(19) | 0.4100(2)   | 0.45308(10) | 5.20(4)         |
| C(12) | 0.19577(17) | 0.0713(3)   | 0.47769(9)  | 5.10(4)         |
| C(13) | 0.01990(16) | 0.2508(3)   | 0.44600(9)  | 5.13(4)         |
| C(14) | 0.53494(12) | 0.09533(19) | 0.24278(7)  | 2.77(2)         |
| C(15) | 0.52169(13) | 0.1931(2)   | 0.18462(7)  | 3.16(3)         |
| C(16) | 0.60629(15) | 0.1912(2)   | 0.14881(8)  | 3.87(3)         |
| C(17) | 0.70353(15) | 0.0924(2)   | 0.16907(9)  | 3.93(3)         |
| C(18) | 0.71793(14) | -0.0019(2)  | 0.22714(9)  | 4.10(3)         |
| C(19) | 0.63448(13) | 0.0010(2)   | 0.26438(8)  | 3.51(3)         |

$$B_{\text{eq}} = 8/3 \pi^2 (U_{11}(aa^*)^2 + U_{22}(bb^*)^2 + U_{33}(cc^*)^2 + 2U_{12}(aa^*bb^*)\cos \gamma + 2U_{13}(aa^*cc^*)\cos \beta + 2U_{23}(bb^*cc^*)\cos \alpha)$$

Table 2. Atomic coordinates and  $B_{iso}$  involving hydrogens/ $B_{eq}$

| atom  | x       | y       | z      | $B_{eq}$ |
|-------|---------|---------|--------|----------|
| H(1)  | 0.5978  | 0.3126  | 0.4501 | 5.51     |
| H(2)  | 0.6622  | 0.2540  | 0.3962 | 5.47     |
| H(3)  | 0.5693  | 0.4027  | 0.3822 | 5.51     |
| H(4)  | 0.5226  | -0.1423 | 0.4577 | 5.65     |
| H(5)  | 0.4389  | -0.2175 | 0.3987 | 5.68     |
| H(6)  | 0.5652  | -0.2013 | 0.3956 | 5.69     |
| H(7)  | 0.3323  | 0.0607  | 0.2029 | 3.40     |
| H(8)  | -0.0282 | 0.1843  | 0.3304 | 3.95     |
| H(9)  | -0.0311 | 0.0969  | 0.2219 | 4.14     |
| H(10) | 0.1448  | 0.0410  | 0.1874 | 3.64     |
| H(11) | 0.2774  | 0.4011  | 0.4469 | 6.36     |
| H(12) | 0.1650  | 0.5051  | 0.4264 | 6.38     |
| H(13) | 0.2010  | 0.4372  | 0.4972 | 6.37     |
| H(14) | 0.1920  | 0.0969  | 0.5216 | 6.26     |
| H(15) | 0.1568  | -0.0397 | 0.4648 | 6.28     |
| H(16) | 0.2719  | 0.0587  | 0.4734 | 6.26     |
| H(17) | -0.0148 | 0.3515  | 0.4214 | 6.37     |
| H(18) | -0.0206 | 0.1414  | 0.4328 | 6.41     |
| H(19) | 0.0203  | 0.2720  | 0.4906 | 6.39     |
| H(20) | 0.4521  | 0.2685  | 0.1709 | 3.81     |
| H(21) | 0.5965  | 0.2598  | 0.1048 | 4.79     |
| H(22) | 0.7697  | 0.0834  | 0.1458 | 4.95     |
| H(23) | 0.7839  | -0.0866 | 0.2396 | 5.11     |
| H(24) | 0.6449  | -0.0742 | 0.3070 | 4.28     |

$$B_{eq} = 8/3 \pi^2 (U_{11}(aa^*)^2 + U_{22}(bb^*)^2 + U_{33}(cc^*)^2 + 2U_{12}(aa^*bb^*)\cos \gamma + 2U_{13}(aa^*cc^*)\cos \beta + 2U_{23}(bb^*cc^*)\cos \alpha)$$

Table 3. Anisotropic displacement parameters

| atom  | U <sub>11</sub>          | U <sub>22</sub> | U <sub>33</sub> | U <sub>12</sub> | U <sub>13</sub> | U <sub>23</sub> |
|-------|--------------------------|-----------------|-----------------|-----------------|-----------------|-----------------|
| Al(1) | 0.0326(2)<br>0.00248(18) | 0.0447(2)       | 0.0339(2)       | -0.00179(18)    | 0.00619(18)     |                 |
| O(1)  | 0.0326(5)                | 0.0696(7)       | 0.0326(5)       | -0.0013(5)      | 0.0073(4)       | -0.0072(5)      |
| N(1)  | 0.0332(6)                | 0.0374(6)       | 0.0354(6)       | 0.0024(4)       | 0.0111(4)       | 0.0014(4)       |
| C(1)  | 0.0496(10)               | 0.0643(11)      | 0.0574(10)      | -0.0130(8)      | 0.0069(8)       | -0.0001(8)      |
| C(2)  | 0.0804(14)               | 0.0543(9)       | 0.0431(9)       | 0.0015(9)       | 0.0078(8)       | 0.0065(7)       |
| C(3)  | 0.0331(7)                | 0.0363(6)       | 0.0341(7)       | -0.0000(5)      | 0.0086(5)       | 0.0023(5)       |
| C(4)  | 0.0334(7)                | 0.0340(6)       | 0.0351(7)       | 0.0007(5)       | 0.0087(5)       | 0.0010(5)       |
| C(5)  | 0.0380(7)                | 0.0361(6)       | 0.0320(6)       | 0.0009(5)       | 0.0093(5)       | -0.0011(5)      |
| C(6)  | 0.0375(7)                | 0.0379(7)       | 0.0384(7)       | 0.0021(6)       | 0.0140(6)       | 0.0050(5)       |
| C(7)  | 0.0320(7)                | 0.0445(7)       | 0.0495(8)       | 0.0014(6)       | 0.0141(6)       | 0.0063(6)       |
| C(8)  | 0.0337(7)                | 0.0489(8)       | 0.0468(8)       | -0.0018(6)      | 0.0036(6)       | 0.0018(6)       |
| C(9)  | 0.0382(8)                | 0.0401(7)       | 0.0369(7)       | -0.0011(6)      | 0.0046(6)       | -0.0007(5)      |
| C(10) | 0.0439(8)                | 0.0639(10)      | 0.0380(8)       | 0.0069(7)       | 0.0163(6)       | 0.0029(7)       |
| C(11) | 0.0745(14)               | 0.0772(12)      | 0.0499(10)      | -0.0011(10)     | 0.0218(9)       | -0.0199(9)      |
| C(12) | 0.0619(12)               | 0.0925(14)      | 0.0434(9)       | 0.0186(10)      | 0.0203(8)       | 0.0197(9)       |
| C(13) | 0.0557(11)               | 0.0964(15)      | 0.0498(10)      | 0.0180(10)      | 0.0275(8)       | 0.0059(9)       |
| C(14) | 0.0348(7)                | 0.0361(6)       | 0.0366(7)       | -0.0007(5)      | 0.0128(5)       | -0.0033(5)      |
| C(15) | 0.0429(8)                | 0.0431(7)       | 0.0361(7)       | 0.0015(6)       | 0.0126(6)       | -0.0015(6)      |
| C(16) | 0.0554(10)               | 0.0573(9)       | 0.0383(8)       | -0.0063(7)      | 0.0191(7)       | -0.0037(7)      |
| C(17) | 0.0452(9)                | 0.0540(9)       | 0.0565(9)       | -0.0050(7)      | 0.0262(7)       | -0.0111(7)      |
| C(18) | 0.0385(8)                | 0.0489(8)       | 0.0735(11)      | 0.0028(7)       | 0.0233(7)       | -0.0006(8)      |
| C(19) | 0.0372(8)                | 0.0457(8)       | 0.0528(9)       | 0.0026(6)       | 0.0143(6)       | 0.0060(6)       |

The general temperature factor expression:  $\exp(-2\pi^2(a^2U_{11}h^2 + b^2U_{22}k^2 + c^2U_{33}l^2 + 2a*b*U_{12}hk + 2a*c*U_{13}hl + 2b*c*U_{23}kl))$

Table 4. Bond lengths (Å)

| atom  | atom  | distance   | atom  | atom  | distance   |
|-------|-------|------------|-------|-------|------------|
| Al(1) | O(1)  | 1.7792(11) | Al(1) | N(1)  | 1.9896(13) |
| Al(1) | C(1)  | 1.9482(18) | Al(1) | C(2)  | 1.9607(18) |
| O(1)  | C(3)  | 1.3257(16) | N(1)  | C(5)  | 1.3024(18) |
| N(1)  | C(14) | 1.430(2)   | C(3)  | C(4)  | 1.418(2)   |
| C(3)  | C(6)  | 1.422(2)   | C(4)  | C(5)  | 1.435(2)   |
| C(4)  | C(9)  | 1.4142(19) | C(6)  | C(7)  | 1.3833(18) |
| C(6)  | C(10) | 1.535(2)   | C(7)  | C(8)  | 1.408(2)   |
| C(8)  | C(9)  | 1.364(2)   | C(10) | C(11) | 1.530(2)   |
| C(10) | C(12) | 1.542(2)   | C(10) | C(13) | 1.545(2)   |
| C(14) | C(15) | 1.398(2)   | C(14) | C(19) | 1.392(2)   |
| C(15) | C(16) | 1.381(2)   | C(16) | C(17) | 1.381(2)   |
| C(17) | C(18) | 1.383(2)   | C(18) | C(19) | 1.390(2)   |



Table 5. Bond lengths involving hydrogens (Å)

| atom  | atom  | distance | atom  | atom  | distance |
|-------|-------|----------|-------|-------|----------|
| C(1)  | H(1)  | 0.950    | C(1)  | H(2)  | 0.950    |
| C(1)  | H(3)  | 0.950    | C(2)  | H(4)  | 0.950    |
| C(2)  | H(5)  | 0.950    | C(2)  | H(6)  | 0.950    |
| C(5)  | H(7)  | 0.983    | C(7)  | H(8)  | 0.985    |
| C(8)  | H(9)  | 1.021    | C(9)  | H(10) | 0.999    |
| C(11) | H(11) | 0.950    | C(11) | H(12) | 0.950    |
| C(11) | H(13) | 0.950    | C(12) | H(14) | 0.950    |
| C(12) | H(15) | 0.950    | C(12) | H(16) | 0.950    |
| C(13) | H(17) | 0.950    | C(13) | H(18) | 0.950    |
| C(13) | H(19) | 0.950    | C(15) | H(20) | 1.004    |
| C(16) | H(21) | 1.039    | C(17) | H(22) | 1.017    |
| C(18) | H(23) | 1.007    | C(19) | H(24) | 1.038    |

Table 6. Bond angles (°)

| atom  | atom  | atom  | angle      | atom  | atom  | atom  | angle      |
|-------|-------|-------|------------|-------|-------|-------|------------|
| O(1)  | Al(1) | N(1)  | 93.44(5)   | O(1)  | Al(1) | C(1)  | 111.93(7)  |
| O(1)  | Al(1) | C(2)  | 110.51(8)  | N(1)  | Al(1) | C(1)  | 108.90(6)  |
| N(1)  | Al(1) | C(2)  | 109.59(6)  | C(1)  | Al(1) | C(2)  | 119.36(8)  |
| Al(1) | O(1)  | C(3)  | 130.64(10) | Al(1) | N(1)  | C(5)  | 119.74(11) |
| Al(1) | N(1)  | C(14) | 122.94(8)  | C(5)  | N(1)  | C(14) | 117.32(12) |
| O(1)  | C(3)  | C(4)  | 119.79(13) | O(1)  | C(3)  | C(6)  | 120.33(13) |
| C(4)  | C(3)  | C(6)  | 119.86(12) | C(3)  | C(4)  | C(5)  | 123.11(12) |
| C(3)  | C(4)  | C(9)  | 120.06(13) | C(5)  | C(4)  | C(9)  | 116.68(13) |
| N(1)  | C(5)  | C(4)  | 127.39(13) | C(3)  | C(6)  | C(7)  | 117.43(13) |
| C(3)  | C(6)  | C(10) | 120.69(12) | C(7)  | C(6)  | C(10) | 121.86(14) |
| C(6)  | C(7)  | C(8)  | 123.10(14) | C(7)  | C(8)  | C(9)  | 119.47(13) |
| C(4)  | C(9)  | C(8)  | 120.07(13) | C(6)  | C(10) | C(11) | 111.08(14) |
| C(6)  | C(10) | C(12) | 109.18(14) | C(6)  | C(10) | C(13) | 111.35(12) |
| C(11) | C(10) | C(12) | 110.48(13) | C(11) | C(10) | C(13) | 107.30(16) |
| C(12) | C(10) | C(13) | 107.39(15) | N(1)  | C(14) | C(15) | 120.94(12) |
| N(1)  | C(14) | C(19) | 119.72(13) | C(15) | C(14) | C(19) | 119.33(14) |
| C(14) | C(15) | C(16) | 119.60(14) | C(15) | C(16) | C(17) | 121.12(15) |
| C(16) | C(17) | C(18) | 119.51(17) | C(17) | C(18) | C(19) | 120.17(15) |
| C(14) | C(19) | C(18) | 120.21(15) |       |       |       |            |

Table 7. Bond angles involving hydrogens (°)

| atom  | atom  | atom  | angle | atom  | atom  | atom  | angle |
|-------|-------|-------|-------|-------|-------|-------|-------|
| Al(1) | C(1)  | H(1)  | 109.5 | Al(1) | C(1)  | H(2)  | 109.7 |
| Al(1) | C(1)  | H(3)  | 109.2 | H(1)  | C(1)  | H(2)  | 109.5 |
| H(1)  | C(1)  | H(3)  | 109.5 | H(2)  | C(1)  | H(3)  | 109.5 |
| Al(1) | C(2)  | H(4)  | 109.8 | Al(1) | C(2)  | H(5)  | 109.3 |
| Al(1) | C(2)  | H(6)  | 109.3 | H(4)  | C(2)  | H(5)  | 109.5 |
| H(4)  | C(2)  | H(6)  | 109.5 | H(5)  | C(2)  | H(6)  | 109.5 |
| N(1)  | C(5)  | H(7)  | 118.2 | C(4)  | C(5)  | H(7)  | 114.4 |
| C(6)  | C(7)  | H(8)  | 119.9 | C(8)  | C(7)  | H(8)  | 117.0 |
| C(7)  | C(8)  | H(9)  | 119.8 | C(9)  | C(8)  | H(9)  | 120.7 |
| C(4)  | C(9)  | H(10) | 118.1 | C(8)  | C(9)  | H(10) | 121.8 |
| C(10) | C(11) | H(11) | 109.8 | C(10) | C(11) | H(12) | 108.6 |
| C(10) | C(11) | H(13) | 110.0 | H(11) | C(11) | H(12) | 109.5 |
| H(11) | C(11) | H(13) | 109.5 | H(12) | C(11) | H(13) | 109.5 |
| C(10) | C(12) | H(14) | 109.9 | C(10) | C(12) | H(15) | 108.9 |
| C(10) | C(12) | H(16) | 109.6 | H(14) | C(12) | H(15) | 109.5 |
| H(14) | C(12) | H(16) | 109.5 | H(15) | C(12) | H(16) | 109.5 |
| C(10) | C(13) | H(17) | 109.4 | C(10) | C(13) | H(18) | 108.8 |
| C(10) | C(13) | H(19) | 110.3 | H(17) | C(13) | H(18) | 109.5 |
| H(17) | C(13) | H(19) | 109.5 | H(18) | C(13) | H(19) | 109.5 |
| C(14) | C(15) | H(20) | 119.0 | C(16) | C(15) | H(20) | 121.3 |
| C(15) | C(16) | H(21) | 120.4 | C(17) | C(16) | H(21) | 118.4 |
| C(16) | C(17) | H(22) | 126.3 | C(18) | C(17) | H(22) | 114.2 |
| C(17) | C(18) | H(23) | 119.9 | C(19) | C(18) | H(23) | 119.4 |
| C(14) | C(19) | H(24) | 120.2 | C(18) | C(19) | H(24) | 119.5 |

Table 8. Torsion Angles(°)

| atom1 | atom2 | atom3 | atom4 | angle       | atom1 | atom2 | atom3 | atom4 | angle       |
|-------|-------|-------|-------|-------------|-------|-------|-------|-------|-------------|
| O(1)  | Al(1) | N(1)  | C(5)  | -20.46(10)  | O(1)  | Al(1) | N(1)  | C(14) | 160.04(10)  |
| N(1)  | Al(1) | O(1)  | C(3)  | 27.57(13)   | C(1)  | Al(1) | O(1)  | C(3)  | 139.53(13)  |
| C(2)  | Al(1) | O(1)  | C(3)  | -84.83(14)  | C(1)  | Al(1) | N(1)  | C(5)  | -135.04(11) |
| C(1)  | Al(1) | N(1)  | C(14) | 45.45(12)   | C(2)  | Al(1) | N(1)  | C(5)  | 92.74(12)   |
| C(2)  | Al(1) | N(1)  | C(14) | -86.76(12)  | Al(1) | O(1)  | C(3)  | C(4)  | -19.6(2)    |
| Al(1) | O(1)  | C(3)  | C(6)  | 162.10(11)  | Al(1) | N(1)  | C(5)  | C(4)  | 8.55(18)    |
| Al(1) | N(1)  | C(14) | C(15) | -141.27(11) | Al(1) | N(1)  | C(14) | C(19) | 37.74(17)   |
| C(5)  | N(1)  | C(14) | C(15) | 39.21(18)   | C(5)  | N(1)  | C(14) | C(19) | -141.77(13) |
| C(14) | N(1)  | C(5)  | C(4)  | -171.92(12) | O(1)  | C(3)  | C(4)  | C(5)  | -2.8(2)     |
| O(1)  | C(3)  | C(4)  | C(9)  | -178.14(12) | O(1)  | C(3)  | C(6)  | C(7)  | 177.15(13)  |
| O(1)  | C(3)  | C(6)  | C(10) | -4.1(2)     | C(4)  | C(3)  | C(6)  | C(7)  | -1.1(2)     |
| C(4)  | C(3)  | C(6)  | C(10) | 177.65(13)  | C(6)  | C(3)  | C(4)  | C(5)  | 175.50(12)  |
| C(6)  | C(3)  | C(4)  | C(9)  | 0.2(2)      | C(3)  | C(4)  | C(5)  | N(1)  | 6.7(2)      |
| C(3)  | C(4)  | C(9)  | C(8)  | 0.9(2)      | C(5)  | C(4)  | C(9)  | C(8)  | -174.78(13) |
| C(9)  | C(4)  | C(5)  | N(1)  | -177.80(13) | C(3)  | C(6)  | C(7)  | C(8)  | 1.2(2)      |
| C(3)  | C(6)  | C(10) | C(11) | 61.00(19)   | C(3)  | C(6)  | C(10) | C(12) | -61.07(19)  |
| C(3)  | C(6)  | C(10) | C(13) | -179.47(15) | C(7)  | C(6)  | C(10) | C(11) | -120.26(17) |
| C(7)  | C(6)  | C(10) | C(12) | 117.66(16)  | C(7)  | C(6)  | C(10) | C(13) | -0.7(2)     |
| C(10) | C(6)  | C(7)  | C(8)  | -177.58(15) | C(6)  | C(7)  | C(8)  | C(9)  | -0.2(2)     |
| C(7)  | C(8)  | C(9)  | C(4)  | -0.8(2)     | N(1)  | C(14) | C(15) | C(16) | -179.49(13) |
| N(1)  | C(14) | C(19) | C(18) | 178.39(13)  | C(15) | C(14) | C(19) | C(18) | -2.6(2)     |
| C(19) | C(14) | C(15) | C(16) | 1.5(2)      | C(14) | C(15) | C(16) | C(17) | 0.8(2)      |
| C(15) | C(16) | C(17) | C(18) | -1.9(2)     | C(16) | C(17) | C(18) | C(19) | 0.8(2)      |
| C(17) | C(18) | C(19) | C(14) | 1.4(2)      |       |       |       |       |             |

The sign is positive if when looking from atom 2 to atom 3 a clock-wise motion of atom 1 would superimpose it on atom 4.

Table 9. Distances beyond the asymmetric unit out to 3.60 Å

| atom  | atom                | distance   | atom  | atom                | distance   |
|-------|---------------------|------------|-------|---------------------|------------|
| Al(1) | C(3)                | 2.8277(14) | Al(1) | C(4)                | 3.2216(13) |
| Al(1) | C(5)                | 2.8680(14) | Al(1) | C(14)               | 3.0162(16) |
| Al(1) | C(19)               | 3.3629(18) | O(1)  | N(1)                | 2.7474(17) |
| O(1)  | C(1)                | 3.090(2)   | O(1)  | C(2)                | 3.075(2)   |
| O(1)  | C(4)                | 2.3743(16) | O(1)  | C(5)                | 2.8617(18) |
| O(1)  | C(6)                | 2.3841(17) | O(1)  | C(10)               | 2.882(2)   |
| O(1)  | C(11)               | 2.988(2)   | O(1)  | C(12)               | 3.029(2)   |
| N(1)  | O(1)                | 2.7474(17) | N(1)  | C(1)                | 3.204(2)   |
| N(1)  | C(2)                | 3.228(2)   | N(1)  | C(3)                | 3.007(2)   |
| N(1)  | C(4)                | 2.4545(19) | N(1)  | C(15)               | 2.461(2)   |
| N(1)  | C(19)               | 2.440(2)   | C(1)  | O(1)                | 3.090(2)   |
| C(1)  | N(1)                | 3.204(2)   | C(1)  | C(2)                | 3.374(2)   |
| C(2)  | O(1)                | 3.075(2)   | C(2)  | N(1)                | 3.228(2)   |
| C(2)  | C(1)                | 3.374(2)   | C(3)  | Al(1)               | 2.8277(14) |
| C(3)  | N(1)                | 3.007(2)   | C(3)  | C(5)                | 2.509(2)   |
| C(3)  | C(7)                | 2.398(2)   | C(3)  | C(8)                | 2.8086(19) |
| C(3)  | C(9)                | 2.4536(19) | C(3)  | C(10)               | 2.571(2)   |
| C(3)  | C(11)               | 3.121(2)   | C(3)  | C(12)               | 3.090(2)   |
| C(4)  | Al(1)               | 3.2216(13) | C(4)  | O(1)                | 2.3743(16) |
| C(4)  | N(1)                | 2.4545(19) | C(4)  | C(6)                | 2.458(2)   |
| C(4)  | C(7)                | 2.766(2)   | C(4)  | C(8)                | 2.407(2)   |
| C(5)  | Al(1)               | 2.8680(14) | C(5)  | O(1)                | 2.8617(18) |
| C(5)  | C(3)                | 2.509(2)   | C(5)  | C(9)                | 2.425(2)   |
| C(5)  | C(14)               | 2.335(2)   | C(5)  | C(15)               | 2.858(2)   |
| C(5)  | C(19)               | 3.519(2)   | C(6)  | O(1)                | 2.3841(17) |
| C(6)  | C(4)                | 2.458(2)   | C(6)  | C(8)                | 2.454(2)   |
| C(6)  | C(9)                | 2.835(2)   | C(6)  | C(11)               | 2.527(2)   |
| C(6)  | C(12)               | 2.507(2)   | C(6)  | C(13)               | 2.544(2)   |
| C(7)  | C(3)                | 2.398(2)   | C(7)  | C(4)                | 2.766(2)   |
| C(7)  | C(9)                | 2.394(2)   | C(7)  | C(10)               | 2.5518(19) |
| C(7)  | C(12)               | 3.574(2)   | C(7)  | C(13)               | 2.840(2)   |
| C(7)  | C(14) <sup>1)</sup> | 3.490(2)   | C(7)  | C(15) <sup>2)</sup> | 3.487(2)   |
| C(7)  | C(19) <sup>1)</sup> | 3.539(2)   | C(8)  | C(3)                | 2.8086(19) |
| C(8)  | C(4)                | 2.407(2)   | C(8)  | C(6)                | 2.454(2)   |
| C(8)  | C(15) <sup>2)</sup> | 3.445(2)   | C(8)  | C(19) <sup>1)</sup> | 3.558(2)   |
| C(9)  | C(3)                | 2.4536(19) | C(9)  | C(5)                | 2.425(2)   |
| C(9)  | C(6)                | 2.835(2)   | C(9)  | C(7)                | 2.394(2)   |

Table 9. Distances beyond the asymmetric unit out to 3.60 Å (continued)

| atom  | atom              | distance   | atom  | atom              | distance |
|-------|-------------------|------------|-------|-------------------|----------|
| C(10) | O(1)              | 2.882(2)   | C(10) | C(3)              | 2.571(2) |
| C(10) | C(7)              | 2.5518(19) | C(11) | O(1)              | 2.988(2) |
| C(11) | C(3)              | 3.121(2)   | C(11) | C(6)              | 2.527(2) |
| C(11) | C(12)             | 2.523(3)   | C(11) | C(13)             | 2.477(3) |
| C(12) | O(1)              | 3.029(2)   | C(12) | C(3)              | 3.090(2) |
| C(12) | C(6)              | 2.507(2)   | C(12) | C(7)              | 3.574(2) |
| C(12) | C(11)             | 2.523(3)   | C(12) | C(13)             | 2.488(2) |
| C(13) | C(6)              | 2.544(2)   | C(13) | C(7)              | 2.840(2) |
| C(13) | C(11)             | 2.477(3)   | C(13) | C(12)             | 2.488(2) |
| C(14) | Al(1)             | 3.0162(16) | C(14) | C(5)              | 2.335(2) |
| C(14) | C(7) <sup>2</sup> | 3.490(2)   | C(14) | C(16)             | 2.401(2) |
| C(14) | C(17)             | 2.785(2)   | C(14) | C(18)             | 2.411(2) |
| C(15) | N(1)              | 2.461(2)   | C(15) | C(5)              | 2.858(2) |
| C(15) | C(7) <sup>1</sup> | 3.487(2)   | C(15) | C(8) <sup>1</sup> | 3.445(2) |
| C(15) | C(17)             | 2.405(2)   | C(15) | C(18)             | 2.776(2) |
| C(15) | C(19)             | 2.408(2)   | C(16) | C(14)             | 2.401(2) |
| C(16) | C(18)             | 2.388(2)   | C(16) | C(19)             | 2.762(2) |
| C(17) | C(14)             | 2.785(2)   | C(17) | C(15)             | 2.405(2) |
| C(17) | C(19)             | 2.403(2)   | C(18) | C(14)             | 2.411(2) |
| C(18) | C(15)             | 2.776(2)   | C(18) | C(16)             | 2.388(2) |
| C(19) | Al(1)             | 3.3629(18) | C(19) | N(1)              | 2.440(2) |
| C(19) | C(5)              | 3.519(2)   | C(19) | C(7) <sup>2</sup> | 3.539(2) |
| C(19) | C(8) <sup>2</sup> | 3.558(2)   | C(19) | C(15)             | 2.408(2) |
| C(19) | C(16)             | 2.762(2)   | C(19) | C(17)             | 2.403(2) |

Symmetry Operators:

(1)  $-X+1/2, Y+1/2, -Z+1/2$

(2)  $-X+1/2, Y+1/2-1, -Z+1/2$

Table 10. Distances beyond the asymmetric unit out to 3.60 Å involving hydrogens

| atom  | atom                | distance | atom  | atom                | distance |
|-------|---------------------|----------|-------|---------------------|----------|
| Al(1) | H(1)                | 2.436    | Al(1) | H(2)                | 2.438    |
| Al(1) | H(3)                | 2.432    | Al(1) | H(4)                | 2.452    |
| Al(1) | H(4) <sup>1)</sup>  | 3.491    | Al(1) | H(5)                | 2.445    |
| Al(1) | H(6)                | 2.445    | Al(1) | H(16)               | 3.530    |
| Al(1) | H(24)               | 2.987    | O(1)  | H(1)                | 3.318    |
| O(1)  | H(3)                | 3.201    | O(1)  | H(4)                | 3.396    |
| O(1)  | H(4) <sup>1)</sup>  | 3.483    | O(1)  | H(5)                | 3.110    |
| O(1)  | H(10) <sup>2)</sup> | 3.027    | O(1)  | H(11)               | 2.350    |
| O(1)  | H(12)               | 3.451    | O(1)  | H(15)               | 3.479    |
| O(1)  | H(16)               | 2.412    | N(1)  | H(2)                | 3.416    |
| N(1)  | H(3)                | 3.259    | N(1)  | H(5)                | 3.376    |
| N(1)  | H(6)                | 3.343    | N(1)  | H(7)                | 1.968    |
| N(1)  | H(10) <sup>2)</sup> | 3.553    | N(1)  | H(20)               | 2.644    |
| N(1)  | H(24)               | 2.645    | C(1)  | H(4)                | 3.503    |
| C(1)  | H(4) <sup>1)</sup>  | 3.593    | C(1)  | H(9) <sup>2)</sup>  | 3.442    |
| C(1)  | H(13) <sup>3)</sup> | 3.542    | C(1)  | H(22) <sup>4)</sup> | 3.021    |
| C(1)  | H(24)               | 3.501    | C(2)  | H(1)                | 3.572    |
| C(2)  | H(1) <sup>1)</sup>  | 3.572    | C(2)  | H(2)                | 3.534    |
| C(2)  | H(3) <sup>5)</sup>  | 3.455    | C(2)  | H(4) <sup>1)</sup>  | 3.519    |
| C(2)  | H(9) <sup>6)</sup>  | 3.436    | C(2)  | H(10) <sup>6)</sup> | 3.380    |
| C(2)  | H(16) <sup>1)</sup> | 3.342    | C(2)  | H(24)               | 3.065    |
| C(3)  | H(7)                | 3.342    | C(3)  | H(7) <sup>2)</sup>  | 3.201    |
| C(3)  | H(8)                | 3.298    | C(3)  | H(10)               | 3.344    |
| C(3)  | H(10) <sup>2)</sup> | 3.228    | C(3)  | H(11)               | 2.831    |
| C(3)  | H(12)               | 3.371    | C(3)  | H(15)               | 3.297    |
| C(3)  | H(16)               | 2.816    | C(4)  | H(7)                | 2.047    |
| C(4)  | H(7) <sup>2)</sup>  | 3.519    | C(4)  | H(9)                | 3.338    |
| C(4)  | H(10)               | 2.081    | C(4)  | H(10) <sup>2)</sup> | 3.495    |
| C(5)  | H(10)               | 2.563    | C(5)  | H(10) <sup>2)</sup> | 3.575    |
| C(5)  | H(20)               | 2.651    | C(6)  | H(7) <sup>2)</sup>  | 3.132    |
| C(6)  | H(8)                | 2.060    | C(6)  | H(9)                | 3.363    |
| C(6)  | H(11)               | 2.702    | C(6)  | H(12)               | 2.700    |
| C(6)  | H(13)               | 3.347    | C(6)  | H(14)               | 3.331    |
| C(6)  | H(15)               | 2.654    | C(6)  | H(16)               | 2.701    |
| C(6)  | H(17)               | 2.750    | C(6)  | H(18)               | 2.686    |
| C(6)  | H(19)               | 3.361    | C(6)  | H(20) <sup>6)</sup> | 3.245    |
| C(7)  | H(7) <sup>2)</sup>  | 3.345    | C(7)  | H(9)                | 2.110    |

Table 10. Distances beyond the asymmetric unit out to 3.60 Å involving hydrogens (continued)

| atom  | atom                | distance | atom  | atom                 | distance |
|-------|---------------------|----------|-------|----------------------|----------|
| C(7)  | H(10)               | 3.313    | C(7)  | H(12)                | 3.525    |
| C(7)  | H(15)               | 3.453    | C(7)  | H(17)                | 2.789    |
| C(7)  | H(18)               | 2.677    | C(7)  | H(20) <sup>6)</sup>  | 2.855    |
| C(8)  | H(3) <sup>6)</sup>  | 3.285    | C(8)  | H(5) <sup>2)</sup>   | 3.478    |
| C(8)  | H(6) <sup>2)</sup>  | 3.451    | C(8)  | H(8)                 | 2.052    |
| C(8)  | H(10)               | 2.073    | C(8)  | H(20) <sup>6)</sup>  | 2.941    |
| C(8)  | H(23) <sup>7)</sup> | 3.422    | C(8)  | H(24) <sup>2)</sup>  | 3.330    |
| C(9)  | H(3) <sup>6)</sup>  | 3.437    | C(9)  | H(5) <sup>2)</sup>   | 3.130    |
| C(9)  | H(7)                | 2.503    | C(9)  | H(8)                 | 3.263    |
| C(9)  | H(9)                | 2.080    | C(9)  | H(20) <sup>6)</sup>  | 3.374    |
| C(10) | H(8)                | 2.723    | C(10) | H(11)                | 2.055    |
| C(10) | H(12)               | 2.042    | C(10) | H(13)                | 2.059    |
| C(10) | H(14)               | 2.067    | C(10) | H(15)                | 2.057    |
| C(10) | H(16)               | 2.064    | C(10) | H(17)                | 2.065    |
| C(10) | H(18)               | 2.058    | C(10) | H(19)                | 2.075    |
| C(11) | H(1) <sup>3)</sup>  | 3.508    | C(11) | H(7) <sup>2)</sup>   | 3.408    |
| C(11) | H(14)               | 2.710    | C(11) | H(15)                | 3.335    |
| C(11) | H(16)               | 2.703    | C(11) | H(17)                | 2.629    |
| C(11) | H(18)               | 3.299    | C(11) | H(19)                | 2.673    |
| C(12) | H(4) <sup>1)</sup>  | 3.477    | C(12) | H(11)                | 2.720    |
| C(12) | H(12)               | 3.335    | C(12) | H(13)                | 2.694    |
| C(12) | H(17)               | 3.315    | C(12) | H(18)                | 2.672    |
| C(12) | H(18) <sup>8)</sup> | 3.455    | C(12) | H(19)                | 2.639    |
| C(12) | H(21) <sup>9)</sup> | 3.359    | C(13) | H(8)                 | 2.439    |
| C(13) | H(11)               | 3.309    | C(13) | H(12)                | 2.639    |
| C(13) | H(13)               | 2.638    | C(13) | H(14)                | 2.631    |
| C(13) | H(15)               | 2.674    | C(13) | H(15) <sup>8)</sup>  | 3.458    |
| C(13) | H(16)               | 3.317    | C(13) | H(21) <sup>9)</sup>  | 3.296    |
| C(14) | H(2)                | 3.504    | C(14) | H(7)                 | 2.462    |
| C(14) | H(8) <sup>6)</sup>  | 3.358    | C(14) | H(20)                | 2.080    |
| C(14) | H(21)               | 3.346    | C(14) | H(23)                | 3.312    |
| C(14) | H(23) <sup>4)</sup> | 3.168    | C(14) | H(24)                | 2.113    |
| C(15) | H(7)                | 2.586    | C(15) | H(8) <sup>2)</sup>   | 3.591    |
| C(15) | H(9) <sup>2)</sup>  | 3.526    | C(15) | H(12) <sup>6)</sup>  | 3.242    |
| C(15) | H(17) <sup>6)</sup> | 3.329    | C(15) | H(21)                | 2.106    |
| C(15) | H(22)               | 3.358    | C(15) | H(23) <sup>4)</sup>  | 3.049    |
| C(15) | H(24)               | 3.351    | C(16) | H(14) <sup>10)</sup> | 3.411    |



Table 10. Distances beyond the asymmetric unit out to 3.60 Å involving hydrogens (continued)

| atom  | atom                | distance | atom  | atom                 | distance |
|-------|---------------------|----------|-------|----------------------|----------|
| C(16) | H(17) <sup>6)</sup> | 2.986    | C(16) | H(19) <sup>10)</sup> | 3.307    |
| C(16) | H(20)               | 2.087    | C(16) | H(22)                | 2.145    |
| C(16) | H(23)               | 3.296    | C(16) | H(23) <sup>4)</sup>  | 2.957    |
| C(16) | H(24) <sup>4)</sup> | 3.445    | C(17) | H(2) <sup>11)</sup>  | 3.381    |
| C(17) | H(3) <sup>11)</sup> | 3.430    | C(17) | H(9) <sup>12)</sup>  | 3.209    |
| C(17) | H(17) <sup>6)</sup> | 3.215    | C(17) | H(20)                | 3.318    |
| C(17) | H(21)               | 2.086    | C(17) | H(23)                | 2.077    |
| C(17) | H(23) <sup>4)</sup> | 3.010    | C(17) | H(24)                | 3.338    |
| C(17) | H(24) <sup>4)</sup> | 3.031    | C(18) | H(8) <sup>6)</sup>   | 3.311    |
| C(18) | H(9) <sup>12)</sup> | 3.153    | C(18) | H(21)                | 3.320    |
| C(18) | H(22)               | 2.024    | C(18) | H(23) <sup>4)</sup>  | 3.103    |
| C(18) | H(24)               | 2.105    | C(19) | H(2)                 | 3.291    |
| C(19) | H(6)                | 3.366    | C(19) | H(8) <sup>6)</sup>   | 3.163    |
| C(19) | H(9) <sup>6)</sup>  | 3.231    | C(19) | H(20)                | 3.310    |
| C(19) | H(22)               | 3.282    | C(19) | H(23)                | 2.078    |
| C(19) | H(23) <sup>4)</sup> | 3.167    | H(1)  | Al(1)                | 2.436    |
| H(1)  | O(1)                | 3.318    | H(1)  | C(2)                 | 3.572    |
| H(1)  | C(2) <sup>1)</sup>  | 3.572    | H(1)  | C(11) <sup>3)</sup>  | 3.508    |
| H(1)  | H(2)                | 1.551    | H(1)  | H(3)                 | 1.551    |
| H(1)  | H(4)                | 3.446    | H(1)  | H(4) <sup>1)</sup>   | 2.909    |
| H(1)  | H(5) <sup>1)</sup>  | 3.359    | H(1)  | H(11) <sup>3)</sup>  | 3.180    |
| H(1)  | H(13) <sup>3)</sup> | 3.085    | H(1)  | H(16) <sup>1)</sup>  | 3.385    |
| H(1)  | H(22) <sup>4)</sup> | 3.425    | H(2)  | Al(1)                | 2.438    |
| H(2)  | N(1)                | 3.416    | H(2)  | C(2)                 | 3.534    |
| H(2)  | C(14)               | 3.504    | H(2)  | C(17) <sup>4)</sup>  | 3.381    |
| H(2)  | C(19)               | 3.291    | H(2)  | H(1)                 | 1.551    |
| H(2)  | H(3)                | 1.551    | H(2)  | H(6)                 | 3.516    |
| H(2)  | H(13) <sup>3)</sup> | 3.386    | H(2)  | H(14) <sup>1)</sup>  | 3.394    |
| H(2)  | H(16) <sup>1)</sup> | 3.540    | H(2)  | H(22) <sup>4)</sup>  | 2.735    |
| H(2)  | H(23) <sup>4)</sup> | 3.256    | H(2)  | H(24)                | 3.019    |
| H(3)  | Al(1)               | 2.432    | H(3)  | O(1)                 | 3.201    |
| H(3)  | N(1)                | 3.259    | H(3)  | C(2) <sup>13)</sup>  | 3.455    |
| H(3)  | C(8) <sup>2)</sup>  | 3.285    | H(3)  | C(9) <sup>2)</sup>   | 3.437    |
| H(3)  | C(17) <sup>4)</sup> | 3.430    | H(3)  | H(1)                 | 1.551    |
| H(3)  | H(2)                | 1.551    | H(3)  | H(5) <sup>13)</sup>  | 3.236    |
| H(3)  | H(6) <sup>13)</sup> | 2.898    | H(3)  | H(9) <sup>2)</sup>   | 2.574    |
| H(3)  | H(10) <sup>2)</sup> | 2.918    | H(3)  | H(22) <sup>4)</sup>  | 2.514    |

Table 10. Distances beyond the asymmetric unit out to 3.60 Å involving hydrogens (continued)

| atom | atom                | distance | atom | atom                 | distance |
|------|---------------------|----------|------|----------------------|----------|
| H(3) | H(23) <sup>4)</sup> | 3.378    | H(4) | Al(1)                | 2.452    |
| H(4) | Al(1) <sup>1)</sup> | 3.491    | H(4) | O(1)                 | 3.396    |
| H(4) | O(1) <sup>1)</sup>  | 3.483    | H(4) | C(1)                 | 3.503    |
| H(4) | C(1) <sup>1)</sup>  | 3.593    | H(4) | C(2) <sup>1)</sup>   | 3.519    |
| H(4) | C(12) <sup>1)</sup> | 3.477    | H(4) | H(1)                 | 3.446    |
| H(4) | H(1) <sup>1)</sup>  | 2.909    | H(4) | H(4) <sup>1)</sup>   | 2.847    |
| H(4) | H(5)                | 1.551    | H(4) | H(6)                 | 1.551    |
| H(4) | H(11) <sup>1)</sup> | 3.415    | H(4) | H(14) <sup>1)</sup>  | 3.428    |
| H(4) | H(16)               | 3.447    | H(4) | H(16) <sup>1)</sup>  | 2.713    |
| H(5) | Al(1)               | 2.445    | H(5) | O(1)                 | 3.110    |
| H(5) | N(1)                | 3.376    | H(5) | C(8) <sup>6)</sup>   | 3.478    |
| H(5) | C(9) <sup>6)</sup>  | 3.130    | H(5) | H(1) <sup>1)</sup>   | 3.359    |
| H(5) | H(3) <sup>5)</sup>  | 3.236    | H(5) | H(4)                 | 1.551    |
| H(5) | H(6)                | 1.551    | H(5) | H(9) <sup>6)</sup>   | 3.247    |
| H(5) | H(10) <sup>6)</sup> | 2.593    | H(5) | H(16)                | 3.433    |
| H(5) | H(24)               | 3.582    | H(6) | Al(1)                | 2.445    |
| H(6) | N(1)                | 3.343    | H(6) | C(8) <sup>6)</sup>   | 3.451    |
| H(6) | C(19)               | 3.366    | H(6) | H(2)                 | 3.516    |
| H(6) | H(3) <sup>5)</sup>  | 2.898    | H(6) | H(4)                 | 1.551    |
| H(6) | H(5)                | 1.551    | H(6) | H(9) <sup>6)</sup>   | 2.837    |
| H(6) | H(10) <sup>6)</sup> | 3.380    | H(6) | H(14) <sup>1)</sup>  | 3.227    |
| H(6) | H(16) <sup>1)</sup> | 3.251    | H(6) | H(22) <sup>11)</sup> | 2.806    |
| H(6) | H(24)               | 2.432    | H(7) | N(1)                 | 1.968    |
| H(7) | C(3)                | 3.342    | H(7) | C(3) <sup>6)</sup>   | 3.201    |
| H(7) | C(4)                | 2.047    | H(7) | C(4) <sup>6)</sup>   | 3.519    |
| H(7) | C(6) <sup>6)</sup>  | 3.132    | H(7) | C(7) <sup>6)</sup>   | 3.345    |
| H(7) | C(9)                | 2.503    | H(7) | C(11) <sup>6)</sup>  | 3.408    |
| H(7) | C(14)               | 2.462    | H(7) | C(15)                | 2.586    |
| H(7) | H(10)               | 2.244    | H(7) | H(11) <sup>6)</sup>  | 3.390    |
| H(7) | H(12) <sup>6)</sup> | 2.753    | H(7) | H(20)                | 2.284    |
| H(8) | C(3)                | 3.298    | H(8) | C(6)                 | 2.060    |
| H(8) | C(8)                | 2.052    | H(8) | C(9)                 | 3.263    |
| H(8) | C(10)               | 2.723    | H(8) | C(13)                | 2.439    |
| H(8) | C(14) <sup>2)</sup> | 3.358    | H(8) | C(15) <sup>6)</sup>  | 3.591    |
| H(8) | C(18) <sup>2)</sup> | 3.311    | H(8) | C(19) <sup>2)</sup>  | 3.163    |
| H(8) | H(9)                | 2.362    | H(8) | H(17)                | 2.246    |
| H(8) | H(18)               | 2.158    | H(8) | H(19)                | 3.370    |

Table 10. Distances beyond the asymmetric unit out to 3.60 Å involving hydrogens (continued)

| atom  | atom                 | distance | atom  | atom                | distance |
|-------|----------------------|----------|-------|---------------------|----------|
| H(8)  | H(20) <sup>6)</sup>  | 3.166    | H(8)  | H(21) <sup>6)</sup> | 3.536    |
| H(8)  | H(23) <sup>7)</sup>  | 3.337    | H(8)  | H(23) <sup>2)</sup> | 3.592    |
| H(8)  | H(24) <sup>2)</sup>  | 3.455    | H(9)  | C(1) <sup>6)</sup>  | 3.442    |
| H(9)  | C(2) <sup>2)</sup>   | 3.436    | H(9)  | C(4)                | 3.338    |
| H(9)  | C(6)                 | 3.363    | H(9)  | C(7)                | 2.110    |
| H(9)  | C(9)                 | 2.080    | H(9)  | C(15) <sup>6)</sup> | 3.526    |
| H(9)  | C(17) <sup>7)</sup>  | 3.209    | H(9)  | C(18) <sup>7)</sup> | 3.153    |
| H(9)  | C(19) <sup>2)</sup>  | 3.231    | H(9)  | H(3) <sup>6)</sup>  | 2.574    |
| H(9)  | H(5) <sup>2)</sup>   | 3.247    | H(9)  | H(6) <sup>2)</sup>  | 2.837    |
| H(9)  | H(8)                 | 2.362    | H(9)  | H(10)               | 2.413    |
| H(9)  | H(20) <sup>6)</sup>  | 3.304    | H(9)  | H(22) <sup>7)</sup> | 2.645    |
| H(9)  | H(23) <sup>7)</sup>  | 2.698    | H(9)  | H(24) <sup>2)</sup> | 2.774    |
| H(10) | O(1) <sup>6)</sup>   | 3.027    | H(10) | N(1) <sup>6)</sup>  | 3.553    |
| H(10) | C(2) <sup>2)</sup>   | 3.380    | H(10) | C(3)                | 3.344    |
| H(10) | C(3) <sup>6)</sup>   | 3.228    | H(10) | C(4)                | 2.081    |
| H(10) | C(4) <sup>6)</sup>   | 3.495    | H(10) | C(5)                | 2.563    |
| H(10) | C(5) <sup>6)</sup>   | 3.575    | H(10) | C(7)                | 3.313    |
| H(10) | C(8)                 | 2.073    | H(10) | H(3) <sup>6)</sup>  | 2.918    |
| H(10) | H(5) <sup>2)</sup>   | 2.593    | H(10) | H(6) <sup>2)</sup>  | 3.380    |
| H(10) | H(7)                 | 2.244    | H(10) | H(9)                | 2.413    |
| H(10) | H(11) <sup>6)</sup>  | 3.298    | H(11) | O(1)                | 2.350    |
| H(11) | C(3)                 | 2.831    | H(11) | C(6)                | 2.702    |
| H(11) | C(10)                | 2.055    | H(11) | C(12)               | 2.720    |
| H(11) | C(13)                | 3.309    | H(11) | H(1) <sup>3)</sup>  | 3.180    |
| H(11) | H(4) <sup>1)</sup>   | 3.415    | H(11) | H(7) <sup>2)</sup>  | 3.390    |
| H(11) | H(10) <sup>2)</sup>  | 3.298    | H(11) | H(12)               | 1.551    |
| H(11) | H(13)                | 1.551    | H(11) | H(14)               | 3.006    |
| H(11) | H(15)                | 3.575    | H(11) | H(16)               | 2.557    |
| H(11) | H(17)                | 3.509    | H(11) | H(19)               | 3.540    |
| H(12) | O(1)                 | 3.451    | H(12) | C(3)                | 3.371    |
| H(12) | C(6)                 | 2.700    | H(12) | C(7)                | 3.525    |
| H(12) | C(10)                | 2.042    | H(12) | C(12)               | 3.335    |
| H(12) | C(13)                | 2.639    | H(12) | C(15) <sup>2)</sup> | 3.242    |
| H(12) | H(7) <sup>2)</sup>   | 2.753    | H(12) | H(11)               | 1.551    |
| H(12) | H(13)                | 1.551    | H(12) | H(14)               | 3.562    |
| H(12) | H(15) <sup>13)</sup> | 3.416    | H(12) | H(16)               | 3.570    |
| H(12) | H(17)                | 2.437    | H(12) | H(18)               | 3.494    |

Table 10. Distances beyond the asymmetric unit out to 3.60 Å involving hydrogens (continued)

| atom  | atom                 | distance | atom  | atom                 | distance |
|-------|----------------------|----------|-------|----------------------|----------|
| H(12) | H(19)                | 2.942    | H(12) | H(19) <sup>14)</sup> | 3.488    |
| H(12) | H(20) <sup>2)</sup>  | 2.968    | H(13) | C(1) <sup>3)</sup>   | 3.542    |
| H(13) | C(6)                 | 3.347    | H(13) | C(10)                | 2.059    |
| H(13) | C(12)                | 2.694    | H(13) | C(13)                | 2.638    |
| H(13) | H(1) <sup>3)</sup>   | 3.085    | H(13) | H(2) <sup>3)</sup>   | 3.386    |
| H(13) | H(11)                | 1.551    | H(13) | H(12)                | 1.551    |
| H(13) | H(14)                | 2.536    | H(13) | H(15)                | 3.559    |
| H(13) | H(16)                | 2.957    | H(13) | H(17)                | 2.873    |
| H(13) | H(17) <sup>14)</sup> | 3.438    | H(13) | H(18)                | 3.516    |
| H(13) | H(19)                | 2.483    | H(13) | H(19) <sup>14)</sup> | 3.466    |
| H(13) | H(21) <sup>9)</sup>  | 3.136    | H(13) | H(22) <sup>9)</sup>  | 3.084    |
| H(14) | C(6)                 | 3.331    | H(14) | C(10)                | 2.067    |
| H(14) | C(11)                | 2.710    | H(14) | C(13)                | 2.631    |
| H(14) | C(16) <sup>9)</sup>  | 3.411    | H(14) | H(2) <sup>1)</sup>   | 3.394    |
| H(14) | H(4) <sup>1)</sup>   | 3.428    | H(14) | H(6) <sup>1)</sup>   | 3.227    |
| H(14) | H(11)                | 3.006    | H(14) | H(12)                | 3.562    |
| H(14) | H(13)                | 2.536    | H(14) | H(15)                | 1.551    |
| H(14) | H(16)                | 1.551    | H(14) | H(17)                | 3.497    |
| H(14) | H(18)                | 2.911    | H(14) | H(18) <sup>8)</sup>  | 3.000    |
| H(14) | H(19)                | 2.428    | H(14) | H(21) <sup>9)</sup>  | 2.497    |
| H(14) | H(22) <sup>9)</sup>  | 3.495    | H(15) | O(1)                 | 3.479    |
| H(15) | C(3)                 | 3.297    | H(15) | C(6)                 | 2.654    |
| H(15) | C(7)                 | 3.453    | H(15) | C(10)                | 2.057    |
| H(15) | C(11)                | 3.335    | H(15) | C(13)                | 2.674    |
| H(15) | C(13) <sup>8)</sup>  | 3.458    | H(15) | H(11)                | 3.575    |
| H(15) | H(12) <sup>5)</sup>  | 3.416    | H(15) | H(13)                | 3.559    |
| H(15) | H(14)                | 1.551    | H(15) | H(16)                | 1.551    |
| H(15) | H(17)                | 3.547    | H(15) | H(18)                | 2.509    |
| H(15) | H(18) <sup>8)</sup>  | 3.038    | H(15) | H(19)                | 2.919    |
| H(15) | H(19) <sup>8)</sup>  | 3.017    | H(15) | H(20) <sup>6)</sup>  | 3.231    |
| H(15) | H(21) <sup>6)</sup>  | 3.474    | H(16) | Al(1)                | 3.530    |
| H(16) | O(1)                 | 2.412    | H(16) | C(2) <sup>1)</sup>   | 3.342    |
| H(16) | C(3)                 | 2.816    | H(16) | C(6)                 | 2.701    |
| H(16) | C(10)                | 2.064    | H(16) | C(11)                | 2.703    |
| H(16) | C(13)                | 3.317    | H(16) | H(1) <sup>1)</sup>   | 3.385    |
| H(16) | H(2) <sup>1)</sup>   | 3.540    | H(16) | H(4)                 | 3.447    |
| H(16) | H(4) <sup>1)</sup>   | 2.713    | H(16) | H(5)                 | 3.433    |

Table 10. Distances beyond the asymmetric unit out to 3.60 Å involving hydrogens (continued)

| atom  | atom                 | distance | atom  | atom                 | distance |
|-------|----------------------|----------|-------|----------------------|----------|
| H(16) | H(6) <sup>1)</sup>   | 3.251    | H(16) | H(11)                | 2.557    |
| H(16) | H(12)                | 3.570    | H(16) | H(13)                | 2.957    |
| H(16) | H(14)                | 1.551    | H(16) | H(15)                | 1.551    |
| H(16) | H(18)                | 3.548    | H(16) | H(19)                | 3.505    |
| H(17) | C(6)                 | 2.750    | H(17) | C(7)                 | 2.789    |
| H(17) | C(10)                | 2.065    | H(17) | C(11)                | 2.629    |
| H(17) | C(12)                | 3.315    | H(17) | C(15) <sup>2)</sup>  | 3.329    |
| H(17) | C(16) <sup>2)</sup>  | 2.986    | H(17) | C(17) <sup>2)</sup>  | 3.215    |
| H(17) | H(8)                 | 2.246    | H(17) | H(11)                | 3.509    |
| H(17) | H(12)                | 2.437    | H(17) | H(13)                | 2.873    |
| H(17) | H(13) <sup>14)</sup> | 3.438    | H(17) | H(14)                | 3.497    |
| H(17) | H(15)                | 3.547    | H(17) | H(18)                | 1.551    |
| H(17) | H(19)                | 1.551    | H(17) | H(19) <sup>14)</sup> | 3.313    |
| H(17) | H(21) <sup>2)</sup>  | 3.149    | H(17) | H(22) <sup>2)</sup>  | 3.579    |
| H(18) | C(6)                 | 2.686    | H(18) | C(7)                 | 2.677    |
| H(18) | C(10)                | 2.058    | H(18) | C(11)                | 3.299    |
| H(18) | C(12)                | 2.672    | H(18) | C(12) <sup>8)</sup>  | 3.455    |
| H(18) | H(8)                 | 2.158    | H(18) | H(12)                | 3.494    |
| H(18) | H(13)                | 3.516    | H(18) | H(14)                | 2.911    |
| H(18) | H(14) <sup>8)</sup>  | 3.000    | H(18) | H(15)                | 2.509    |
| H(18) | H(15) <sup>8)</sup>  | 3.038    | H(18) | H(16)                | 3.548    |
| H(18) | H(17)                | 1.551    | H(18) | H(18) <sup>8)</sup>  | 3.458    |
| H(18) | H(19)                | 1.551    | H(18) | H(19) <sup>8)</sup>  | 3.413    |
| H(18) | H(21) <sup>6)</sup>  | 2.987    | H(19) | C(6)                 | 3.361    |
| H(19) | C(10)                | 2.075    | H(19) | C(11)                | 2.673    |
| H(19) | C(12)                | 2.639    | H(19) | C(16) <sup>9)</sup>  | 3.307    |
| H(19) | H(8)                 | 3.370    | H(19) | H(11)                | 3.540    |
| H(19) | H(12)                | 2.942    | H(19) | H(12) <sup>14)</sup> | 3.488    |
| H(19) | H(13)                | 2.483    | H(19) | H(13) <sup>14)</sup> | 3.466    |
| H(19) | H(14)                | 2.428    | H(19) | H(15)                | 2.919    |
| H(19) | H(15) <sup>8)</sup>  | 3.017    | H(19) | H(16)                | 3.505    |
| H(19) | H(17)                | 1.551    | H(19) | H(17) <sup>14)</sup> | 3.313    |
| H(19) | H(18)                | 1.551    | H(19) | H(18) <sup>8)</sup>  | 3.413    |
| H(19) | H(19) <sup>14)</sup> | 3.388    | H(19) | H(21) <sup>9)</sup>  | 2.418    |
| H(20) | N(1)                 | 2.644    | H(20) | C(5)                 | 2.651    |
| H(20) | C(6) <sup>2)</sup>   | 3.245    | H(20) | C(7) <sup>2)</sup>   | 2.855    |
| H(20) | C(8) <sup>2)</sup>   | 2.941    | H(20) | C(9) <sup>2)</sup>   | 3.374    |

Table 10. Distances beyond the asymmetric unit out to 3.60 Å involving hydrogens (continued)

| atom  | atom                 | distance | atom  | atom                 | distance |
|-------|----------------------|----------|-------|----------------------|----------|
| H(20) | C(14)                | 2.080    | H(20) | C(16)                | 2.087    |
| H(20) | C(17)                | 3.318    | H(20) | C(19)                | 3.310    |
| H(20) | H(7)                 | 2.284    | H(20) | H(8) <sup>2)</sup>   | 3.166    |
| H(20) | H(9) <sup>2)</sup>   | 3.304    | H(20) | H(12) <sup>6)</sup>  | 2.968    |
| H(20) | H(15) <sup>2)</sup>  | 3.231    | H(20) | H(21)                | 2.430    |
| H(20) | H(23) <sup>4)</sup>  | 3.565    | H(21) | C(12) <sup>10)</sup> | 3.359    |
| H(21) | C(13) <sup>10)</sup> | 3.296    | H(21) | C(14)                | 3.346    |
| H(21) | C(15)                | 2.106    | H(21) | C(17)                | 2.086    |
| H(21) | C(18)                | 3.320    | H(21) | H(8) <sup>2)</sup>   | 3.536    |
| H(21) | H(13) <sup>10)</sup> | 3.136    | H(21) | H(14) <sup>10)</sup> | 2.497    |
| H(21) | H(15) <sup>2)</sup>  | 3.474    | H(21) | H(17) <sup>6)</sup>  | 3.149    |
| H(21) | H(18) <sup>2)</sup>  | 2.987    | H(21) | H(19) <sup>10)</sup> | 2.418    |
| H(21) | H(20)                | 2.430    | H(21) | H(22)                | 2.479    |
| H(21) | H(23) <sup>4)</sup>  | 3.508    | H(21) | H(24) <sup>4)</sup>  | 3.551    |
| H(22) | C(1) <sup>11)</sup>  | 3.021    | H(22) | C(15)                | 3.358    |
| H(22) | C(16)                | 2.145    | H(22) | C(18)                | 2.024    |
| H(22) | C(19)                | 3.282    | H(22) | H(1) <sup>11)</sup>  | 3.425    |
| H(22) | H(2) <sup>11)</sup>  | 2.735    | H(22) | H(3) <sup>11)</sup>  | 2.514    |
| H(22) | H(6) <sup>4)</sup>   | 2.806    | H(22) | H(9) <sup>12)</sup>  | 2.645    |
| H(22) | H(13) <sup>10)</sup> | 3.084    | H(22) | H(14) <sup>10)</sup> | 3.495    |
| H(22) | H(17) <sup>6)</sup>  | 3.579    | H(22) | H(21)                | 2.479    |
| H(22) | H(23)                | 2.307    | H(22) | H(23) <sup>4)</sup>  | 3.546    |
| H(22) | H(24) <sup>4)</sup>  | 2.809    | H(23) | C(8) <sup>12)</sup>  | 3.422    |
| H(23) | C(14)                | 3.312    | H(23) | C(14) <sup>11)</sup> | 3.168    |
| H(23) | C(15) <sup>11)</sup> | 3.049    | H(23) | C(16)                | 3.296    |
| H(23) | C(16) <sup>11)</sup> | 2.957    | H(23) | C(17)                | 2.077    |
| H(23) | C(17) <sup>11)</sup> | 3.010    | H(23) | C(18) <sup>11)</sup> | 3.103    |
| H(23) | C(19)                | 2.078    | H(23) | C(19) <sup>11)</sup> | 3.167    |
| H(23) | H(2) <sup>11)</sup>  | 3.256    | H(23) | H(3) <sup>11)</sup>  | 3.378    |
| H(23) | H(8) <sup>12)</sup>  | 3.337    | H(23) | H(8) <sup>6)</sup>   | 3.592    |
| H(23) | H(9) <sup>12)</sup>  | 2.698    | H(23) | H(20) <sup>11)</sup> | 3.565    |
| H(23) | H(21) <sup>11)</sup> | 3.508    | H(23) | H(22)                | 2.307    |
| H(23) | H(22) <sup>11)</sup> | 3.546    | H(23) | H(24)                | 2.397    |
| H(24) | Al(1)                | 2.987    | H(24) | N(1)                 | 2.645    |
| H(24) | C(1)                 | 3.501    | H(24) | C(2)                 | 3.065    |
| H(24) | C(8) <sup>6)</sup>   | 3.330    | H(24) | C(14)                | 2.113    |
| H(24) | C(15)                | 3.351    | H(24) | C(16) <sup>11)</sup> | 3.445    |

Table 10. Distances beyond the asymmetric unit out to 3.60 Å involving hydrogens (continued)

| atom  | atom                 | distance | atom  | atom                 | distance |
|-------|----------------------|----------|-------|----------------------|----------|
| H(24) | C(17)                | 3.338    | H(24) | C(17) <sup>11)</sup> | 3.031    |
| H(24) | C(18)                | 2.105    | H(24) | H(2)                 | 3.019    |
| H(24) | H(5)                 | 3.582    | H(24) | H(6)                 | 2.432    |
| H(24) | H(8) <sup>6)</sup>   | 3.455    | H(24) | H(9) <sup>6)</sup>   | 2.774    |
| H(24) | H(21) <sup>11)</sup> | 3.551    | H(24) | H(22) <sup>11)</sup> | 2.809    |
| H(24) | H(23)                | 2.397    |       |                      |          |

Symmetry Operators:

- |                                  |                               |
|----------------------------------|-------------------------------|
| (1) $-X+1, -Y, -Z+1$             | (2) $-X+1/2, Y+1/2, -Z+1/2$   |
| (3) $-X+1, -Y+1, -Z+1$           | (4) $-X+1/2+1, Y+1/2, -Z+1/2$ |
| (5) $X, Y-1, Z$                  | (6) $-X+1/2, Y+1/2-1, -Z+1/2$ |
| (7) $X-1, Y, Z$                  | (8) $-X, -Y, -Z+1$            |
| (9) $X+1/2-1, -Y+1/2, Z+1/2$     | (10) $X+1/2, -Y+1/2, Z+1/2-1$ |
| (11) $-X+1/2+1, Y+1/2-1, -Z+1/2$ | (12) $X+1, Y, Z$              |
| (13) $X, Y+1, Z$                 | (14) $-X, -Y+1, -Z+1$         |

X-ray Structure Report for  $\text{Me}_2\text{Al}[\text{O}-2\text{-}^t\text{Bu}-6\text{-}\{(\text{C}_6\text{F}_5)\text{N}=\text{CH}\}\text{C}_6\text{H}_3]$  (**2g**)

April 12, 2007



## Experimental

### Data Collection

A yellow block crystal of  $C_{19}H_{19}F_5NOAl$  having approximate dimensions of 0.36 x 0.24 x 0.18 mm was mounted on a glass fiber. All measurements were made on a Rigaku RAXIS RAPID imaging plate area detector with graphite monochromated Mo- $K\alpha$  radiation.

Indexing was performed from 3 oscillations that were exposed for 420 seconds. The crystal-to-detector distance was 127.40 mm.

Cell constants and an orientation matrix for data collection corresponded to a primitive orthorhombic cell with dimensions:

$$\begin{aligned}a &= 17.7482(6) \text{ \AA} \\b &= 15.6029(6) \text{ \AA} \\c &= 14.4394(5) \text{ \AA} \\V &= 3998.6(2) \text{ \AA}^3\end{aligned}$$

For  $Z = 8$  and F.W. = 399.34, the calculated density is 1.327 g/cm<sup>3</sup>. The systematic absences of:

$$\begin{aligned}0kl: & l \pm 2n \\h0l: & l \pm 2n \\hk0: & h+k \pm 2n\end{aligned}$$

uniquely determine the space group to be:

$$Pccn \text{ (#56)}$$

The data were collected at a temperature of  $-30 \pm 1^\circ\text{C}$  to a maximum  $2\theta$  value of  $54.9^\circ$ . A total of 44 oscillation images were collected. A sweep of data was done using  $\omega$  scans from  $130.0$  to  $190.0^\circ$  in  $5.0^\circ$  step, at  $\chi=45.0^\circ$  and  $\phi = 120.0^\circ$ . The exposure rate was 180.0 [sec./ $^\circ$ ]. A second sweep was performed using  $\omega$  scans from  $0.0$  to  $160.0^\circ$  in  $5.0^\circ$  step, at  $\chi=45.0^\circ$  and  $\phi = 270.0^\circ$ . The exposure rate was 180.0 [sec./ $^\circ$ ]. The crystal-to-detector distance was 127.40 mm. Readout was performed in the 0.100 mm pixel mode.

## Data Reduction

Of the 35873 reflections that were collected, 4559 were unique ( $R_{\text{int}} = 0.044$ ); equivalent reflections were merged.

The linear absorption coefficient,  $\mu$ , for Mo-K $\alpha$  radiation is 1.537 cm<sup>-1</sup>. An empirical absorption correction was applied which resulted in transmission factors ranging from 0.581 to 0.973. The data were corrected for Lorentz and polarization effects.

## Structure Solution and Refinement

The structure was solved by direct methods<sup>1</sup> and expanded using Fourier techniques<sup>2</sup>. The non-hydrogen atoms were refined anisotropically. Hydrogen atoms were refined using the riding model. The final cycle of full-matrix least-squares refinement<sup>3</sup> on  $F^2$  was based on 2154 observed reflections and 263 variable parameters and converged (largest parameter shift was 0.00 times its esd) with unweighted and weighted agreement factors of:

$$R1 = \sum ||F_o| - |F_c|| / \sum |F_o| = 0.0352$$

$$wR2 = [ \sum ( w (F_o^2 - F_c^2)^2 ) / \sum w(F_o^2)^2 ]^{1/2} = 0.0816$$

The standard deviation of an observation of unit weight<sup>4</sup> was 1.02. A Sheldrick weighting scheme was used. Plots of  $\sum w (|F_o| - |F_c|)^2$  versus  $|F_o|$ , reflection order in data collection,  $\sin \theta/\lambda$  and various classes of indices showed no unusual trends. The maximum and minimum peaks on the final difference Fourier map corresponded to 0.14 and -0.18 e<sup>-</sup>/Å<sup>3</sup>, respectively.

Neutral atom scattering factors were taken from Cromer and Waber<sup>5</sup>. Anomalous dispersion effects were included in  $F_{\text{calc}}$ <sup>6</sup>; the values for  $\Delta f'$  and  $\Delta f''$  were those of Creagh and McAuley<sup>7</sup>. The values for the mass attenuation coefficients are those of Creagh and Hubbell<sup>8</sup>. All calculations were performed using the CrystalStructure<sup>9,10</sup> crystallographic software package.

## References

(1) SIR92: Altomare, A., Cascarano, G., Giacovazzo, C., Guagliardi, A., Burla, M., Polidori, G., and Camalli, M. (1994) J. Appl. Cryst., 27, 435.

(2) DIRDIF99: Beurskens, P.T., Admiraal, G., Beurskens, G., Bosman, W.P., de Gelder, R., Israel, R. and Smits, J.M.M.(1999). The DIRDIF-99 program system, Technical Report of the Crystallography Laboratory, University of Nijmegen, The Netherlands.

(3) Least Squares function minimized:

$$\sum w(F_o^2 - F_c^2)^2 \quad \text{where } w = \text{Least Squares weights.}$$

(4) Standard deviation of an observation of unit weight:

$$[\sum w(F_o^2 - F_c^2)^2 / (N_o - N_v)]^{1/2}$$

where:  $N_o$  = number of observations  
 $N_v$  = number of variables

(5) Cromer, D. T. & Waber, J. T.; "International Tables for X-ray Crystallography", Vol. IV, The Kynoch Press, Birmingham, England, Table 2.2 A (1974).

(6) Ibers, J. A. & Hamilton, W. C.; Acta Crystallogr., 17, 781 (1964).

(7) Creagh, D. C. & McAuley, W.J. ; "International Tables for Crystallography", Vol C, (A.J.C. Wilson, ed.), Kluwer Academic Publishers, Boston, Table 4.2.6.8, pages 219-222 (1992).

(8) Creagh, D. C. & Hubbell, J.H.; "International Tables for Crystallography", Vol C, (A.J.C. Wilson, ed.), Kluwer Academic Publishers, Boston, Table 4.2.4.3, pages 200-206 (1992).

(9) CrystalStructure 3.8: Crystal Structure Analysis Package, Rigaku and Rigaku/MSO (2000-2006). 9009 New Trails Dr. The Woodlands TX 77381 USA.

(10) CRYSTALS Issue 11: Carruthers, J.R., Rollett, J.S., Betteridge, P.W., Kinna, D., Pearce, L., Larsen, A., and Gabe, E. Chemical Crystallography Laboratory, Oxford, UK. (1999)

## EXPERIMENTAL DETAILS

### A. Crystal Data

|                      |                                                                                          |
|----------------------|------------------------------------------------------------------------------------------|
| Empirical Formula    | C <sub>19</sub> H <sub>19</sub> F <sub>5</sub> NOAl                                      |
| Formula Weight       | 399.34                                                                                   |
| Crystal Color, Habit | yellow, block                                                                            |
| Crystal Dimensions   | 0.36 X 0.24 X 0.18 mm                                                                    |
| Crystal System       | orthorhombic                                                                             |
| Lattice Type         | Primitive                                                                                |
| Indexing Images      | 3 oscillations @ 420.0 seconds                                                           |
| Detector Position    | 127.40 mm                                                                                |
| Pixel Size           | 0.100 mm                                                                                 |
| Lattice Parameters   | a = 17.7482(6) Å<br>b = 15.6029(6) Å<br>c = 14.4394(5) Å<br>V = 3998.6(2) Å <sup>3</sup> |
| Space Group          | Pccn (#56)                                                                               |
| Z value              | 8                                                                                        |
| D <sub>calc</sub>    | 1.327 g/cm <sup>3</sup>                                                                  |
| F <sub>000</sub>     | 1648.00                                                                                  |
| μ(MoKα)              | 1.537 cm <sup>-1</sup>                                                                   |

## B. Intensity Measurements

|                                                           |                                                                            |
|-----------------------------------------------------------|----------------------------------------------------------------------------|
| Diffractometer                                            | Rigaku RAXIS-RAPID                                                         |
| Radiation                                                 | MoK $\alpha$ ( $\lambda = 0.71075 \text{ \AA}$ )<br>graphite monochromated |
| Detector Aperture                                         | 280 mm x 256 mm                                                            |
| Data Images                                               | 44 exposures                                                               |
| $\omega$ oscillation Range ( $\chi=45.0$ , $\phi=120.0$ ) | 130.0 - 190.0 $^\circ$                                                     |
| Exposure Rate                                             | 180.0 sec./ $^\circ$                                                       |
| $\omega$ oscillation Range ( $\chi=45.0$ , $\phi=270.0$ ) | 0.0 - 160.0 $^\circ$                                                       |
| Exposure Rate                                             | 180.0 sec./ $^\circ$                                                       |
| Detector Position                                         | 127.40 mm                                                                  |
| Pixel Size                                                | 0.100 mm                                                                   |
| $2\theta_{\max}$                                          | 54.9 $^\circ$                                                              |
| No. of Reflections Measured                               | Total: 35873<br>Unique: 4559 ( $R_{\text{int}} = 0.044$ )                  |
| Corrections                                               | Lorentz-polarization<br>Absorption<br>(trans. factors: 0.581 - 0.973)      |

### C. Structure Solution and Refinement

|                                          |                                                |
|------------------------------------------|------------------------------------------------|
| Structure Solution                       | Direct Methods (SIR92)                         |
| Refinement                               | Full-matrix least-squares on $F^2$             |
| Function Minimized                       | $\sum w (F_o^2 - F_c^2)^2$                     |
| Least Squares Weights                    | $1/[0.0006F_o^2+1.0000\sigma(F_o^2)]/(4F_o^2)$ |
| $2\theta_{\max}$ cutoff                  | 54.9°                                          |
| Anomalous Dispersion                     | All non-hydrogen atoms                         |
| No. Observations ( $I > 2.00\sigma(I)$ ) | 2154                                           |
| No. Variables                            | 263                                            |
| Reflection/Parameter Ratio               | 8.19                                           |
| Residuals: R1 ( $I > 2.00\sigma(I)$ )    | 0.0352                                         |
| Residuals: wR2 ( $I > 2.00\sigma(I)$ )   | 0.0816                                         |
| Goodness of Fit Indicator                | 1.019                                          |
| Max Shift/Error in Final Cycle           | 0.000                                          |
| Maximum peak in Final Diff. Map          | 0.14 e <sup>-</sup> /Å <sup>3</sup>            |
| Minimum peak in Final Diff. Map          | -0.18 e <sup>-</sup> /Å <sup>3</sup>           |

Table 1. Atomic coordinates and  $B_{\text{iso}}/B_{\text{eq}}$

| atom  | x           | y            | z           | $B_{\text{eq}}$ |
|-------|-------------|--------------|-------------|-----------------|
| Al(1) | 0.84228(4)  | 0.03619(5)   | 0.29047(5)  | 3.698(16)       |
| F(1)  | 0.67698(8)  | 0.19804(10)  | 0.29928(11) | 5.97(4)         |
| F(2)  | 0.52840(9)  | 0.16606(13)  | 0.28553(13) | 8.20(5)         |
| F(3)  | 0.46918(8)  | 0.02225(13)  | 0.36306(13) | 8.48(5)         |
| F(4)  | 0.55909(10) | -0.08707(12) | 0.45583(13) | 7.98(5)         |
| F(5)  | 0.70816(9)  | -0.05554(11) | 0.47045(11) | 6.25(4)         |
| O(1)  | 0.92481(8)  | 0.08163(11)  | 0.33934(12) | 4.33(4)         |
| N(1)  | 0.77600(9)  | 0.08578(12)  | 0.38668(13) | 3.54(4)         |
| C(1)  | 0.81113(13) | 0.09012(18)  | 0.17470(17) | 5.16(7)         |
| C(2)  | 0.83875(15) | -0.08790(17) | 0.2984(2)   | 5.78(7)         |
| C(3)  | 0.80077(12) | 0.13522(14)  | 0.45248(16) | 3.49(5)         |
| C(4)  | 0.87727(12) | 0.16023(14)  | 0.46738(15) | 3.41(5)         |
| C(5)  | 0.89028(14) | 0.21412(16)  | 0.54385(18) | 4.67(6)         |
| C(6)  | 0.96161(15) | 0.24061(19)  | 0.56299(19) | 5.66(7)         |
| C(7)  | 1.02092(14) | 0.21271(17)  | 0.50765(18) | 4.90(6)         |
| C(8)  | 1.01224(12) | 0.15922(15)  | 0.43184(16) | 3.61(5)         |
| C(9)  | 0.93765(12) | 0.13261(15)  | 0.41062(16) | 3.36(5)         |
| C(10) | 0.69614(12) | 0.07118(16)  | 0.38431(16) | 3.56(5)         |
| C(11) | 0.64887(13) | 0.12684(17)  | 0.33835(18) | 4.25(6)         |
| C(12) | 0.57268(15) | 0.1113(2)    | 0.3317(2)   | 5.16(7)         |
| C(13) | 0.54329(14) | 0.0393(2)    | 0.3709(2)   | 5.51(7)         |
| C(14) | 0.58852(16) | -0.0164(2)   | 0.4178(2)   | 5.21(7)         |
| C(15) | 0.66438(14) | -0.00056(18) | 0.42436(18) | 4.34(6)         |
| C(16) | 1.08025(12) | 0.12799(17)  | 0.37557(18) | 4.22(6)         |
| C(17) | 1.07252(14) | 0.15345(18)  | 0.27410(17) | 4.97(7)         |
| C(18) | 1.08690(15) | 0.03040(18)  | 0.3847(2)   | 6.51(8)         |
| C(19) | 1.15462(14) | 0.1675(2)    | 0.4101(2)   | 6.63(8)         |

$$B_{\text{eq}} = 8/3 \pi^2 (U_{11}(aa^*)^2 + U_{22}(bb^*)^2 + U_{33}(cc^*)^2 + 2U_{12}(aa^*bb^*)\cos \gamma + 2U_{13}(aa^*cc^*)\cos \beta + 2U_{23}(bb^*cc^*)\cos \alpha)$$

Table 2. Atomic coordinates and  $B_{iso}$  involving hydrogens/ $B_{eq}$

| atom  | x      | y       | z      | $B_{eq}$ |
|-------|--------|---------|--------|----------|
| H(1)  | 0.8502 | 0.0839  | 0.1302 | 6.22     |
| H(2)  | 0.7666 | 0.0635  | 0.1524 | 6.24     |
| H(3)  | 0.8018 | 0.1493  | 0.1851 | 6.22     |
| H(4)  | 0.8614 | -0.1120 | 0.2448 | 6.97     |
| H(5)  | 0.7879 | -0.1065 | 0.3026 | 6.97     |
| H(6)  | 0.8656 | -0.1059 | 0.3519 | 6.98     |
| H(7)  | 0.7643 | 0.1582  | 0.4982 | 4.16     |
| H(8)  | 0.8460 | 0.2313  | 0.5816 | 5.60     |
| H(9)  | 0.9688 | 0.2756  | 0.6187 | 6.78     |
| H(10) | 1.0708 | 0.2322  | 0.5235 | 5.86     |
| H(11) | 1.1159 | 0.1352  | 0.2410 | 5.96     |
| H(12) | 1.0676 | 0.2139  | 0.2690 | 5.97     |
| H(13) | 1.0291 | 0.1266  | 0.2489 | 5.97     |
| H(14) | 1.1302 | 0.0110  | 0.3522 | 7.81     |
| H(15) | 1.0432 | 0.0044  | 0.3592 | 7.81     |
| H(16) | 1.0912 | 0.0153  | 0.4482 | 7.83     |
| H(17) | 1.1954 | 0.1479  | 0.3732 | 7.95     |
| H(18) | 1.1628 | 0.1516  | 0.4728 | 7.95     |
| H(19) | 1.1512 | 0.2281  | 0.4058 | 7.98     |

$$B_{eq} = 8/3 \pi^2 (U_{11}(aa^*)^2 + U_{22}(bb^*)^2 + U_{33}(cc^*)^2 + 2U_{12}(aa^*bb^*)\cos \gamma + 2U_{13}(aa^*cc^*)\cos \beta + 2U_{23}(bb^*cc^*)\cos \alpha)$$



Table 3. Anisotropic displacement parameters

| atom  | U <sub>11</sub> | U <sub>22</sub> | U <sub>33</sub> | U <sub>12</sub> | U <sub>13</sub> | U <sub>23</sub> |
|-------|-----------------|-----------------|-----------------|-----------------|-----------------|-----------------|
| Al(1) | 0.0410(3)       | 0.0532(4)       | 0.0464(4)       | -0.0032(3)      | -0.0002(3)      | -0.0107(3)      |
| F(1)  | 0.0696(9)       | 0.0574(9)       | 0.0999(12)      | 0.0079(7)       | 0.0016(8)       | 0.0067(9)       |
| F(2)  | 0.0652(10)      | 0.1251(15)      | 0.1214(15)      | 0.0335(10)      | -0.0207(10)     | -0.0100(12)     |
| F(3)  | 0.0431(8)       | 0.1673(19)      | 0.1120(14)      | -0.0259(10)     | 0.0032(9)       | -0.0433(13)     |
| F(4)  | 0.0993(12)      | 0.1056(14)      | 0.0985(13)      | -0.0505(11)     | 0.0276(11)      | -0.0044(11)     |
| F(5)  | 0.0812(10)      | 0.0803(11)      | 0.0758(10)      | -0.0023(9)      | 0.0046(8)       | 0.0217(9)       |
| O(1)  | 0.0414(8)       | 0.0655(11)      | 0.0577(10)      | -0.0034(8)      | -0.0014(8)      | -0.0245(9)      |
| N(1)  | 0.0386(10)      | 0.0493(12)      | 0.0468(11)      | -0.0039(9)      | -0.0011(9)      | -0.0047(10)     |
| C(1)  | 0.0551(15)      | 0.078(2)        | 0.0624(17)      | -0.0031(14)     | 0.0032(13)      | -0.0029(15)     |
| C(2)  | 0.0731(18)      | 0.0654(19)      | 0.0809(19)      | -0.0039(15)     | 0.0077(16)      | -0.0133(16)     |
| C(3)  | 0.0483(14)      | 0.0416(13)      | 0.0427(14)      | 0.0017(11)      | 0.0003(11)      | -0.0017(12)     |
| C(4)  | 0.0445(13)      | 0.0445(13)      | 0.0408(14)      | -0.0026(10)     | -0.0039(11)     | -0.0043(11)     |
| C(5)  | 0.0588(16)      | 0.0632(17)      | 0.0556(16)      | -0.0072(13)     | 0.0015(13)      | -0.0190(14)     |
| C(6)  | 0.0703(17)      | 0.085(2)        | 0.0595(18)      | -0.0146(16)     | -0.0048(15)     | -0.0285(17)     |
| C(7)  | 0.0508(15)      | 0.0727(18)      | 0.0626(17)      | -0.0124(13)     | -0.0122(13)     | -0.0075(15)     |
| C(8)  | 0.0441(13)      | 0.0470(14)      | 0.0459(14)      | -0.0007(11)     | -0.0086(11)     | 0.0017(12)      |
| C(9)  | 0.0443(13)      | 0.0412(13)      | 0.0423(14)      | -0.0001(11)     | -0.0062(11)     | 0.0015(12)      |
| C(10) | 0.0388(12)      | 0.0492(15)      | 0.0473(14)      | -0.0007(11)     | 0.0015(11)      | -0.0101(12)     |
| C(11) | 0.0482(15)      | 0.0504(16)      | 0.0630(17)      | -0.0010(12)     | 0.0035(13)      | -0.0092(14)     |
| C(12) | 0.0447(15)      | 0.081(2)        | 0.0702(19)      | 0.0134(15)      | -0.0072(14)     | -0.0176(17)     |
| C(13) | 0.0391(14)      | 0.100(2)        | 0.071(2)        | -0.0117(17)     | 0.0051(14)      | -0.0304(19)     |
| C(14) | 0.0611(18)      | 0.075(2)        | 0.0620(18)      | -0.0269(16)     | 0.0144(15)      | -0.0144(16)     |
| C(15) | 0.0555(16)      | 0.0600(16)      | 0.0494(15)      | -0.0011(14)     | 0.0027(13)      | -0.0032(14)     |
| C(16) | 0.0401(13)      | 0.0596(17)      | 0.0608(16)      | 0.0013(11)      | -0.0090(12)     | 0.0032(14)      |
| C(17) | 0.0527(15)      | 0.0746(19)      | 0.0615(18)      | 0.0038(13)      | 0.0031(13)      | -0.0001(15)     |
| C(18) | 0.0669(18)      | 0.066(2)        | 0.115(2)        | 0.0259(15)      | 0.0051(18)      | 0.0144(18)      |
| C(19) | 0.0447(15)      | 0.123(2)        | 0.084(2)        | -0.0042(16)     | -0.0110(14)     | -0.009(2)       |

The general temperature factor expression:  $\exp(-2\pi^2(a^2U_{11}h^2 + b^2U_{22}k^2 + c^2U_{33}l^2 + 2a*b*U_{12}hk + 2a*c*U_{13}hl + 2b*c*U_{23}kl))$

Table 4. Bond lengths (Å)

| atom  | atom  | distance   | atom  | atom  | distance   |
|-------|-------|------------|-------|-------|------------|
| Al(1) | O(1)  | 1.7737(16) | Al(1) | N(1)  | 1.9780(19) |
| Al(1) | C(1)  | 1.951(2)   | Al(1) | C(2)  | 1.941(2)   |
| F(1)  | C(11) | 1.342(3)   | F(2)  | C(12) | 1.338(3)   |
| F(3)  | C(13) | 1.347(2)   | F(4)  | C(14) | 1.338(3)   |
| F(5)  | C(15) | 1.335(3)   | O(1)  | C(9)  | 1.321(2)   |
| N(1)  | C(3)  | 1.300(2)   | N(1)  | C(10) | 1.436(2)   |
| C(3)  | C(4)  | 1.429(3)   | C(4)  | C(5)  | 1.407(3)   |
| C(4)  | C(9)  | 1.416(3)   | C(5)  | C(6)  | 1.360(3)   |
| C(6)  | C(7)  | 1.391(3)   | C(7)  | C(8)  | 1.385(3)   |
| C(8)  | C(9)  | 1.421(3)   | C(8)  | C(16) | 1.534(3)   |
| C(10) | C(11) | 1.378(3)   | C(10) | C(15) | 1.380(3)   |
| C(11) | C(12) | 1.377(3)   | C(12) | C(13) | 1.362(4)   |
| C(13) | C(14) | 1.364(4)   | C(14) | C(15) | 1.372(3)   |
| C(16) | C(17) | 1.524(3)   | C(16) | C(18) | 1.533(3)   |
| C(16) | C(19) | 1.540(3)   |       |       |            |

Table 5. Bond lengths involving hydrogens (Å)

| atom  | atom  | distance | atom  | atom  | distance |
|-------|-------|----------|-------|-------|----------|
| C(1)  | H(1)  | 0.950    | C(1)  | H(2)  | 0.950    |
| C(1)  | H(3)  | 0.950    | C(2)  | H(4)  | 0.950    |
| C(2)  | H(5)  | 0.950    | C(2)  | H(6)  | 0.950    |
| C(3)  | H(7)  | 0.991    | C(5)  | H(8)  | 0.993    |
| C(6)  | H(9)  | 0.981    | C(7)  | H(10) | 0.964    |
| C(17) | H(11) | 0.950    | C(17) | H(12) | 0.950    |
| C(17) | H(13) | 0.950    | C(18) | H(14) | 0.950    |
| C(18) | H(15) | 0.950    | C(18) | H(16) | 0.950    |
| C(19) | H(17) | 0.950    | C(19) | H(18) | 0.950    |
| C(19) | H(19) | 0.950    |       |       |          |

Table 6. Bond angles (°)

| atom  | atom  | atom  | angle      | atom  | atom  | atom  | angle      |
|-------|-------|-------|------------|-------|-------|-------|------------|
| O(1)  | Al(1) | N(1)  | 93.17(7)   | O(1)  | Al(1) | C(1)  | 113.73(10) |
| O(1)  | Al(1) | C(2)  | 113.71(10) | N(1)  | Al(1) | C(1)  | 105.34(9)  |
| N(1)  | Al(1) | C(2)  | 109.26(10) | C(1)  | Al(1) | C(2)  | 118.12(12) |
| Al(1) | O(1)  | C(9)  | 133.89(14) | Al(1) | N(1)  | C(3)  | 122.97(14) |
| Al(1) | N(1)  | C(10) | 120.55(14) | C(3)  | N(1)  | C(10) | 116.44(18) |
| N(1)  | C(3)  | C(4)  | 126.4(2)   | C(3)  | C(4)  | C(5)  | 115.9(2)   |
| C(3)  | C(4)  | C(9)  | 123.3(2)   | C(5)  | C(4)  | C(9)  | 120.8(2)   |
| C(4)  | C(5)  | C(6)  | 119.6(2)   | C(5)  | C(6)  | C(7)  | 119.5(2)   |
| C(6)  | C(7)  | C(8)  | 123.9(2)   | C(7)  | C(8)  | C(9)  | 116.8(2)   |
| C(7)  | C(8)  | C(16) | 121.5(2)   | C(9)  | C(8)  | C(16) | 121.7(2)   |
| O(1)  | C(9)  | C(4)  | 120.25(18) | O(1)  | C(9)  | C(8)  | 120.32(19) |
| C(4)  | C(9)  | C(8)  | 119.4(2)   | N(1)  | C(10) | C(11) | 120.8(2)   |
| N(1)  | C(10) | C(15) | 121.5(2)   | C(11) | C(10) | C(15) | 117.7(2)   |
| F(1)  | C(11) | C(10) | 119.9(2)   | F(1)  | C(11) | C(12) | 118.8(2)   |
| C(10) | C(11) | C(12) | 121.4(2)   | F(2)  | C(12) | C(11) | 119.9(2)   |
| F(2)  | C(12) | C(13) | 120.6(2)   | C(11) | C(12) | C(13) | 119.5(2)   |
| F(3)  | C(13) | C(12) | 120.2(2)   | F(3)  | C(13) | C(14) | 119.4(2)   |
| C(12) | C(13) | C(14) | 120.5(2)   | F(4)  | C(14) | C(13) | 120.0(2)   |
| F(4)  | C(14) | C(15) | 120.2(2)   | C(13) | C(14) | C(15) | 119.8(2)   |
| F(5)  | C(15) | C(10) | 119.5(2)   | F(5)  | C(15) | C(14) | 119.3(2)   |
| C(10) | C(15) | C(14) | 121.2(2)   | C(8)  | C(16) | C(17) | 110.82(19) |
| C(8)  | C(16) | C(18) | 109.3(2)   | C(8)  | C(16) | C(19) | 112.1(2)   |
| C(17) | C(16) | C(18) | 110.4(2)   | C(17) | C(16) | C(19) | 106.5(2)   |
| C(18) | C(16) | C(19) | 107.7(2)   |       |       |       |            |

Table 7. Bond angles involving hydrogens (°)

| atom  | atom  | atom  | angle | atom  | atom  | atom  | angle |
|-------|-------|-------|-------|-------|-------|-------|-------|
| Al(1) | C(1)  | H(1)  | 109.2 | Al(1) | C(1)  | H(2)  | 109.8 |
| Al(1) | C(1)  | H(3)  | 109.4 | H(1)  | C(1)  | H(2)  | 109.5 |
| H(1)  | C(1)  | H(3)  | 109.5 | H(2)  | C(1)  | H(3)  | 109.5 |
| Al(1) | C(2)  | H(4)  | 109.5 | Al(1) | C(2)  | H(5)  | 109.9 |
| Al(1) | C(2)  | H(6)  | 109.0 | H(4)  | C(2)  | H(5)  | 109.5 |
| H(4)  | C(2)  | H(6)  | 109.5 | H(5)  | C(2)  | H(6)  | 109.5 |
| N(1)  | C(3)  | H(7)  | 118.7 | C(4)  | C(3)  | H(7)  | 114.9 |
| C(4)  | C(5)  | H(8)  | 117.5 | C(6)  | C(5)  | H(8)  | 122.9 |
| C(5)  | C(6)  | H(9)  | 117.2 | C(7)  | C(6)  | H(9)  | 123.2 |
| C(6)  | C(7)  | H(10) | 117.3 | C(8)  | C(7)  | H(10) | 118.7 |
| C(16) | C(17) | H(11) | 109.4 | C(16) | C(17) | H(12) | 110.0 |
| C(16) | C(17) | H(13) | 109.0 | H(11) | C(17) | H(12) | 109.5 |
| H(11) | C(17) | H(13) | 109.5 | H(12) | C(17) | H(13) | 109.5 |
| C(16) | C(18) | H(14) | 109.7 | C(16) | C(18) | H(15) | 109.1 |
| C(16) | C(18) | H(16) | 109.6 | H(14) | C(18) | H(15) | 109.5 |
| H(14) | C(18) | H(16) | 109.5 | H(15) | C(18) | H(16) | 109.5 |
| C(16) | C(19) | H(17) | 110.0 | C(16) | C(19) | H(18) | 109.6 |
| C(16) | C(19) | H(19) | 108.8 | H(17) | C(19) | H(18) | 109.5 |
| H(17) | C(19) | H(19) | 109.5 | H(18) | C(19) | H(19) | 109.5 |

Table 8. Torsion Angles(°)

| atom1 | atom2 | atom3 | atom4 | angle       | atom1 | atom2 | atom3 | atom4 | angle       |
|-------|-------|-------|-------|-------------|-------|-------|-------|-------|-------------|
| O(1)  | Al(1) | N(1)  | C(3)  | 2.22(19)    | O(1)  | Al(1) | N(1)  | C(10) | 179.51(17)  |
| N(1)  | Al(1) | O(1)  | C(9)  | -2.6(2)     | C(1)  | Al(1) | O(1)  | C(9)  | 105.6(2)    |
| C(2)  | Al(1) | O(1)  | C(9)  | -115.3(2)   | C(1)  | Al(1) | N(1)  | C(3)  | -113.45(19) |
| C(1)  | Al(1) | N(1)  | C(10) | 63.85(19)   | C(2)  | Al(1) | N(1)  | C(3)  | 118.71(19)  |
| C(2)  | Al(1) | N(1)  | C(10) | -64.00(19)  | Al(1) | O(1)  | C(9)  | C(4)  | 1.7(3)      |
| Al(1) | O(1)  | C(9)  | C(8)  | -179.21(17) | Al(1) | N(1)  | C(3)  | C(4)  | -1.2(3)     |
| Al(1) | N(1)  | C(10) | C(11) | -90.8(2)    | Al(1) | N(1)  | C(10) | C(15) | 86.5(2)     |
| C(3)  | N(1)  | C(10) | C(11) | 86.7(2)     | C(3)  | N(1)  | C(10) | C(15) | -96.1(2)    |
| C(10) | N(1)  | C(3)  | C(4)  | -178.6(2)   | N(1)  | C(3)  | C(4)  | C(5)  | -179.7(2)   |
| N(1)  | C(3)  | C(4)  | C(9)  | -0.5(3)     | C(3)  | C(4)  | C(5)  | C(6)  | 179.8(2)    |
| C(3)  | C(4)  | C(9)  | O(1)  | 0.5(3)      | C(3)  | C(4)  | C(9)  | C(8)  | -178.6(2)   |
| C(5)  | C(4)  | C(9)  | O(1)  | 179.6(2)    | C(5)  | C(4)  | C(9)  | C(8)  | 0.5(3)      |
| C(9)  | C(4)  | C(5)  | C(6)  | 0.6(3)      | C(4)  | C(5)  | C(6)  | C(7)  | -1.2(3)     |
| C(5)  | C(6)  | C(7)  | C(8)  | 0.8(4)      | C(6)  | C(7)  | C(8)  | C(9)  | 0.3(3)      |
| C(6)  | C(7)  | C(8)  | C(16) | -177.7(2)   | C(7)  | C(8)  | C(9)  | O(1)  | 179.96(15)  |
| C(7)  | C(8)  | C(9)  | C(4)  | -0.9(3)     | C(7)  | C(8)  | C(16) | C(17) | -122.4(2)   |
| C(7)  | C(8)  | C(16) | C(18) | 115.7(2)    | C(7)  | C(8)  | C(16) | C(19) | -3.6(3)     |
| C(9)  | C(8)  | C(16) | C(17) | 59.6(2)     | C(9)  | C(8)  | C(16) | C(18) | -62.2(2)    |
| C(9)  | C(8)  | C(16) | C(19) | 178.4(2)    | C(16) | C(8)  | C(9)  | O(1)  | -2.0(3)     |
| C(16) | C(8)  | C(9)  | C(4)  | 177.1(2)    | N(1)  | C(10) | C(11) | F(1)  | -3.5(3)     |
| N(1)  | C(10) | C(11) | C(12) | 176.8(2)    | N(1)  | C(10) | C(15) | F(5)  | 3.5(3)      |
| N(1)  | C(10) | C(15) | C(14) | -176.6(2)   | C(11) | C(10) | C(15) | F(5)  | -179.2(2)   |
| C(11) | C(10) | C(15) | C(14) | 0.7(3)      | C(15) | C(10) | C(11) | F(1)  | 179.2(2)    |
| C(15) | C(10) | C(11) | C(12) | -0.6(3)     | F(1)  | C(11) | C(12) | F(2)  | 1.2(3)      |
| F(1)  | C(11) | C(12) | C(13) | 179.9(2)    | C(10) | C(11) | C(12) | F(2)  | -179.1(2)   |
| C(10) | C(11) | C(12) | C(13) | -0.3(4)     | F(2)  | C(12) | C(13) | F(3)  | 0.4(4)      |
| F(2)  | C(12) | C(13) | C(14) | 179.9(2)    | C(11) | C(12) | C(13) | F(3)  | -178.4(2)   |
| C(11) | C(12) | C(13) | C(14) | 1.1(4)      | F(3)  | C(13) | C(14) | F(4)  | -0.4(4)     |
| F(3)  | C(13) | C(14) | C(15) | 178.5(2)    | C(12) | C(13) | C(14) | F(4)  | -179.9(2)   |
| C(12) | C(13) | C(14) | C(15) | -1.0(4)     | F(4)  | C(14) | C(15) | F(5)  | -1.1(4)     |
| F(4)  | C(14) | C(15) | C(10) | 178.9(2)    | C(13) | C(14) | C(15) | F(5)  | 179.96(18)  |
| C(13) | C(14) | C(15) | C(10) | 0.0(3)      |       |       |       |       |             |

The sign is positive if when looking from atom 2 to atom 3 a clock-wise motion of atom 1 would superimpose it on atom 4.

Table 9. Distances beyond the asymmetric unit out to 3.60 Å

| atom  | atom               | distance   | atom  | atom               | distance   |
|-------|--------------------|------------|-------|--------------------|------------|
| Al(1) | F(3) <sup>1</sup>  | 3.2892(18) | F(1)  | F(1) <sup>2</sup>  | 3.057(2)   |
| F(1)  | C(3) <sup>2</sup>  | 3.438(2)   | F(1)  | C(4) <sup>2</sup>  | 3.422(2)   |
| F(2)  | C(6) <sup>3</sup>  | 3.422(3)   | F(2)  | C(8) <sup>2</sup>  | 3.524(3)   |
| F(2)  | C(17) <sup>2</sup> | 3.342(3)   | F(3)  | Al(1) <sup>4</sup> | 3.2892(18) |
| F(3)  | F(4) <sup>5</sup>  | 2.848(2)   | F(3)  | O(1) <sup>4</sup>  | 3.433(2)   |
| F(3)  | C(1) <sup>4</sup>  | 3.353(2)   | F(3)  | C(2) <sup>4</sup>  | 3.441(3)   |
| F(3)  | C(14) <sup>5</sup> | 3.327(3)   | F(4)  | F(3) <sup>5</sup>  | 2.848(2)   |
| F(4)  | C(6) <sup>6</sup>  | 3.209(3)   | F(4)  | C(7) <sup>6</sup>  | 3.240(3)   |
| F(4)  | C(13) <sup>5</sup> | 3.181(3)   | F(4)  | C(14) <sup>5</sup> | 3.578(3)   |
| F(4)  | C(17) <sup>4</sup> | 3.486(3)   | F(5)  | C(19) <sup>7</sup> | 3.458(3)   |
| O(1)  | F(3) <sup>1</sup>  | 3.433(2)   | C(1)  | F(3) <sup>1</sup>  | 3.353(2)   |
| C(2)  | F(3) <sup>1</sup>  | 3.441(3)   | C(3)  | F(1) <sup>2</sup>  | 3.438(2)   |
| C(4)  | F(1) <sup>2</sup>  | 3.422(2)   | C(6)  | F(2) <sup>8</sup>  | 3.422(3)   |
| C(6)  | F(4) <sup>9</sup>  | 3.209(3)   | C(7)  | F(4) <sup>9</sup>  | 3.240(3)   |
| C(8)  | F(2) <sup>2</sup>  | 3.524(3)   | C(13) | F(4) <sup>5</sup>  | 3.181(3)   |
| C(14) | F(3) <sup>5</sup>  | 3.327(3)   | C(14) | F(4) <sup>5</sup>  | 3.578(3)   |
| C(14) | C(17) <sup>4</sup> | 3.511(3)   | C(17) | F(2) <sup>2</sup>  | 3.342(3)   |
| C(17) | F(4) <sup>1</sup>  | 3.486(3)   | C(17) | C(14) <sup>1</sup> | 3.511(3)   |
| C(19) | F(5) <sup>7</sup>  | 3.458(3)   |       |                    |            |

Symmetry Operators:

- |                            |                              |
|----------------------------|------------------------------|
| (1) $X+1/2, -Y, -Z+1/2$    | (2) $-X+1/2+1, -Y+1/2, Z$    |
| (3) $-X+1/2+1, Y, Z+1/2-1$ | (4) $X+1/2-1, -Y, -Z+1/2$    |
| (5) $-X+1, -Y, -Z+1$       | (6) $X+1/2-1, Y+1/2-1, -Z+1$ |
| (7) $-X+2, -Y, -Z+1$       | (8) $-X+1/2+1, Y, Z+1/2$     |
| (9) $X+1/2, Y+1/2, -Z+1$   |                              |

Table 10. Distances beyond the asymmetric unit out to 3.60 Å involving hydrogens

| atom  | atom               | distance | atom  | atom               | distance |
|-------|--------------------|----------|-------|--------------------|----------|
| F(1)  | H(3) <sup>1</sup>  | 2.921    | F(1)  | H(8) <sup>2</sup>  | 3.211    |
| F(2)  | H(4) <sup>3</sup>  | 3.112    | F(2)  | H(9) <sup>2</sup>  | 2.953    |
| F(2)  | H(12) <sup>1</sup> | 2.543    | F(2)  | H(13) <sup>1</sup> | 3.434    |
| F(2)  | H(15) <sup>3</sup> | 3.393    | F(3)  | H(1) <sup>3</sup>  | 2.686    |
| F(3)  | H(4) <sup>3</sup>  | 2.836    | F(3)  | H(13) <sup>3</sup> | 3.023    |
| F(3)  | H(15) <sup>3</sup> | 3.492    | F(4)  | H(9) <sup>4</sup>  | 2.885    |
| F(4)  | H(10) <sup>4</sup> | 2.843    | F(4)  | H(11) <sup>3</sup> | 3.108    |
| F(4)  | H(13) <sup>3</sup> | 3.067    | F(5)  | H(1) <sup>5</sup>  | 3.336    |
| F(5)  | H(2) <sup>5</sup>  | 3.248    | F(5)  | H(17) <sup>6</sup> | 3.179    |
| F(5)  | H(18) <sup>6</sup> | 2.857    | O(1)  | H(16) <sup>6</sup> | 3.432    |
| C(1)  | H(7) <sup>2</sup>  | 3.069    | C(1)  | H(8) <sup>7</sup>  | 3.155    |
| C(1)  | H(9) <sup>7</sup>  | 3.588    | C(1)  | H(14) <sup>3</sup> | 3.599    |
| C(2)  | H(18) <sup>6</sup> | 3.451    | C(3)  | H(2) <sup>5</sup>  | 3.318    |
| C(3)  | H(7) <sup>1</sup>  | 3.487    | C(3)  | H(16) <sup>6</sup> | 3.354    |
| C(4)  | H(16) <sup>6</sup> | 3.050    | C(5)  | H(1) <sup>8</sup>  | 3.462    |
| C(5)  | H(3) <sup>8</sup>  | 3.342    | C(5)  | H(7) <sup>1</sup>  | 3.455    |
| C(5)  | H(16) <sup>6</sup> | 3.597    | C(6)  | H(1) <sup>8</sup>  | 3.514    |
| C(6)  | H(12) <sup>8</sup> | 3.590    | C(6)  | H(13) <sup>8</sup> | 3.597    |
| C(7)  | H(6) <sup>6</sup>  | 3.309    | C(9)  | H(16) <sup>6</sup> | 3.122    |
| C(11) | H(14) <sup>3</sup> | 3.507    | C(12) | H(14) <sup>3</sup> | 3.426    |
| C(12) | H(15) <sup>3</sup> | 3.337    | C(13) | H(11) <sup>3</sup> | 3.419    |
| C(13) | H(13) <sup>3</sup> | 3.124    | C(13) | H(15) <sup>3</sup> | 3.392    |
| C(14) | H(11) <sup>3</sup> | 2.988    | C(14) | H(13) <sup>3</sup> | 3.140    |
| C(15) | H(1) <sup>5</sup>  | 3.262    | C(15) | H(11) <sup>3</sup> | 3.295    |
| C(17) | H(9) <sup>7</sup>  | 3.106    | C(18) | H(2) <sup>9</sup>  | 3.550    |
| C(19) | H(6) <sup>6</sup>  | 3.587    | H(1)  | F(3) <sup>9</sup>  | 2.686    |
| H(1)  | F(5) <sup>2</sup>  | 3.336    | H(1)  | C(5) <sup>7</sup>  | 3.462    |
| H(1)  | C(6) <sup>7</sup>  | 3.514    | H(1)  | C(15) <sup>2</sup> | 3.262    |
| H(1)  | H(7) <sup>2</sup>  | 3.018    | H(1)  | H(8) <sup>7</sup>  | 2.968    |
| H(1)  | H(9) <sup>7</sup>  | 3.044    | H(2)  | F(5) <sup>2</sup>  | 3.248    |
| H(2)  | C(3) <sup>2</sup>  | 3.318    | H(2)  | C(18) <sup>3</sup> | 3.550    |
| H(2)  | H(7) <sup>2</sup>  | 2.728    | H(2)  | H(8) <sup>2</sup>  | 3.448    |
| H(2)  | H(14) <sup>3</sup> | 2.685    | H(2)  | H(17) <sup>3</sup> | 3.550    |
| H(3)  | F(1) <sup>1</sup>  | 2.921    | H(3)  | C(5) <sup>7</sup>  | 3.342    |
| H(3)  | H(7) <sup>2</sup>  | 2.947    | H(3)  | H(8) <sup>2</sup>  | 3.279    |
| H(3)  | H(8) <sup>7</sup>  | 2.514    | H(3)  | H(9) <sup>7</sup>  | 3.329    |
| H(4)  | F(2) <sup>9</sup>  | 3.112    | H(4)  | F(3) <sup>9</sup>  | 2.836    |



Table 10. Distances beyond the asymmetric unit out to 3.60 Å involving hydrogens (continued)

| atom  | atom                 | distance | atom  | atom                 | distance |
|-------|----------------------|----------|-------|----------------------|----------|
| H(4)  | H(12) <sup>10)</sup> | 3.001    | H(4)  | H(17) <sup>3)</sup>  | 3.449    |
| H(4)  | H(19) <sup>10)</sup> | 3.316    | H(5)  | H(11) <sup>3)</sup>  | 3.149    |
| H(5)  | H(17) <sup>3)</sup>  | 3.090    | H(5)  | H(18) <sup>6)</sup>  | 3.432    |
| H(6)  | C(7) <sup>6)</sup>   | 3.309    | H(6)  | C(19) <sup>6)</sup>  | 3.587    |
| H(6)  | H(10) <sup>6)</sup>  | 2.898    | H(6)  | H(12) <sup>10)</sup> | 3.515    |
| H(6)  | H(16) <sup>6)</sup>  | 3.305    | H(6)  | H(18) <sup>6)</sup>  | 2.678    |
| H(7)  | C(1) <sup>5)</sup>   | 3.069    | H(7)  | C(3) <sup>1)</sup>   | 3.487    |
| H(7)  | C(5) <sup>1)</sup>   | 3.455    | H(7)  | H(1) <sup>5)</sup>   | 3.018    |
| H(7)  | H(2) <sup>5)</sup>   | 2.728    | H(7)  | H(3) <sup>5)</sup>   | 2.947    |
| H(7)  | H(7) <sup>1)</sup>   | 2.909    | H(7)  | H(8) <sup>1)</sup>   | 2.874    |
| H(8)  | F(1) <sup>5)</sup>   | 3.211    | H(8)  | C(1) <sup>8)</sup>   | 3.155    |
| H(8)  | H(1) <sup>8)</sup>   | 2.968    | H(8)  | H(2) <sup>5)</sup>   | 3.448    |
| H(8)  | H(3) <sup>5)</sup>   | 3.279    | H(8)  | H(3) <sup>8)</sup>   | 2.514    |
| H(8)  | H(7) <sup>1)</sup>   | 2.874    | H(8)  | H(8) <sup>1)</sup>   | 3.458    |
| H(9)  | F(2) <sup>5)</sup>   | 2.953    | H(9)  | F(4) <sup>11)</sup>  | 2.885    |
| H(9)  | C(1) <sup>8)</sup>   | 3.588    | H(9)  | C(17) <sup>8)</sup>  | 3.106    |
| H(9)  | H(1) <sup>8)</sup>   | 3.044    | H(9)  | H(3) <sup>8)</sup>   | 3.329    |
| H(9)  | H(11) <sup>8)</sup>  | 3.446    | H(9)  | H(12) <sup>8)</sup>  | 2.794    |
| H(9)  | H(13) <sup>8)</sup>  | 2.648    | H(10) | F(4) <sup>11)</sup>  | 2.843    |
| H(10) | H(6) <sup>6)</sup>   | 2.898    | H(11) | F(4) <sup>9)</sup>   | 3.108    |
| H(11) | C(13) <sup>9)</sup>  | 3.419    | H(11) | C(14) <sup>9)</sup>  | 2.988    |
| H(11) | C(15) <sup>9)</sup>  | 3.295    | H(11) | H(5) <sup>9)</sup>   | 3.149    |
| H(11) | H(9) <sup>7)</sup>   | 3.446    | H(12) | F(2) <sup>1)</sup>   | 2.543    |
| H(12) | C(6) <sup>7)</sup>   | 3.590    | H(12) | H(4) <sup>12)</sup>  | 3.001    |
| H(12) | H(6) <sup>12)</sup>  | 3.515    | H(12) | H(9) <sup>7)</sup>   | 2.794    |
| H(13) | F(2) <sup>1)</sup>   | 3.434    | H(13) | F(3) <sup>9)</sup>   | 3.023    |
| H(13) | F(4) <sup>9)</sup>   | 3.067    | H(13) | C(6) <sup>7)</sup>   | 3.597    |
| H(13) | C(13) <sup>9)</sup>  | 3.124    | H(13) | C(14) <sup>9)</sup>  | 3.140    |
| H(13) | H(9) <sup>7)</sup>   | 2.648    | H(14) | C(1) <sup>9)</sup>   | 3.599    |
| H(14) | C(11) <sup>9)</sup>  | 3.507    | H(14) | C(12) <sup>9)</sup>  | 3.426    |
| H(14) | H(2) <sup>9)</sup>   | 2.685    | H(15) | F(2) <sup>9)</sup>   | 3.393    |
| H(15) | F(3) <sup>9)</sup>   | 3.492    | H(15) | C(12) <sup>9)</sup>  | 3.337    |
| H(15) | C(13) <sup>9)</sup>  | 3.392    | H(16) | O(1) <sup>6)</sup>   | 3.432    |
| H(16) | C(3) <sup>6)</sup>   | 3.354    | H(16) | C(4) <sup>6)</sup>   | 3.050    |
| H(16) | C(5) <sup>6)</sup>   | 3.597    | H(16) | C(9) <sup>6)</sup>   | 3.122    |
| H(16) | H(6) <sup>6)</sup>   | 3.305    | H(16) | H(16) <sup>6)</sup>  | 3.597    |
| H(17) | F(5) <sup>6)</sup>   | 3.179    | H(17) | H(2) <sup>9)</sup>   | 3.550    |

Table 10. Distances beyond the asymmetric unit out to 3.60 Å involving hydrogens (continued)

| atom  | atom                 | distance | atom  | atom                 | distance |
|-------|----------------------|----------|-------|----------------------|----------|
| H(17) | H(4) <sup>9)</sup>   | 3.449    | H(17) | H(5) <sup>9)</sup>   | 3.090    |
| H(17) | H(19) <sup>13)</sup> | 3.373    | H(18) | F(5) <sup>6)</sup>   | 2.857    |
| H(18) | C(2) <sup>6)</sup>   | 3.451    | H(18) | H(5) <sup>6)</sup>   | 3.432    |
| H(18) | H(6) <sup>6)</sup>   | 2.678    | H(19) | H(4) <sup>12)</sup>  | 3.316    |
| H(19) | H(17) <sup>13)</sup> | 3.373    | H(19) | H(19) <sup>13)</sup> | 3.573    |

Symmetry Operators:

- |                            |                              |
|----------------------------|------------------------------|
| (1) $-X+1/2+1, -Y+1/2, Z$  | (2) $-X+1/2+1, Y, Z+1/2-1$   |
| (3) $X+1/2-1, -Y, -Z+1/2$  | (4) $X+1/2-1, Y+1/2-1, -Z+1$ |
| (5) $-X+1/2+1, Y, Z+1/2$   | (6) $-X+2, -Y, -Z+1$         |
| (7) $X, -Y+1/2, Z+1/2-1$   | (8) $X, -Y+1/2, Z+1/2$       |
| (9) $X+1/2, -Y, -Z+1/2$    | (10) $-X+2, Y+1/2-1, -Z+1/2$ |
| (11) $X+1/2, Y+1/2, -Z+1$  | (12) $-X+2, Y+1/2, -Z+1/2$   |
| (13) $-X+1/2+2, -Y+1/2, Z$ |                              |

X-ray Structure Report for  $\text{Me}_2\text{Al}[\mu_2\text{-O-2-}\{(2,6\text{-}i\text{Pr}_2\text{C}_6\text{H}_3)\text{N=CH}\}\text{C}_6\text{H}_4](\text{AlMe}_3)$  (**3a**)

April 8, 2007

## *Experimental*

### Data Collection

A colorless block crystal of  $C_{150}H_{222}O_6Al_{12}N_6$  having approximate dimensions of 0.40 x 0.24 x 0.14 mm was mounted on a glass fiber. All measurements were made on a Rigaku RAXIS RAPID imaging plate area detector with graphite monochromated Mo- $K\alpha$  radiation.

Indexing was performed from 0 oscillations that were exposed for 0 seconds. The crystal-to-detector distance was 0.00 mm.

Cell constants and an orientation matrix for data collection corresponded to a R-centered trigonal cell (laue class: -3) with dimensions:

$$\begin{aligned} a &= 38.5672(11) \text{ \AA} \\ c &= 9.3498(3) \text{ \AA} \\ V &= 12044.0(6) \text{ \AA}^3 \end{aligned}$$

For  $Z = 3$  and F.W. = 2529.22, the calculated density is 1.046 g/cm<sup>3</sup>. Based on the systematic absences of:

$$hkil: -h+k+l \pm 3n$$

packing considerations, a statistical analysis of intensity distribution, and the successful solution and refinement of the structure, the space group was determined to be:

R-3 (#148)

The data were collected at a temperature of  $-30 \pm 1^\circ\text{C}$  to a maximum  $2\theta$  value of  $54.8^\circ$ . A total of 0 oscillation images were collected. The crystal-to-detector distance was 0.00 mm. Readout was performed in the 0.000 mm pixel mode.

## Data Reduction

Of the 58936 reflections that were collected, 6067 were unique ( $R_{\text{int}} = 0.040$ ); equivalent reflections were merged.

The linear absorption coefficient,  $\mu$ , for Mo-K $\alpha$  radiation is 1.226 cm<sup>-1</sup>. was applied which resulted in transmission factors ranging from 0.818 to 0.983. The data were corrected for Lorentz and polarization effects.

## Structure Solution and Refinement

The structure was solved by heavy-atom Patterson methods<sup>1</sup> and expanded using Fourier techniques<sup>2</sup>. Some non-hydrogen atoms were refined anisotropically, while the rest were refined isotropically. Hydrogen atoms were refined using the riding model. The final cycle of full-matrix least-squares refinement<sup>3</sup> on  $F^2$  was based on 3181 observed reflections and 299 variable parameters and converged (largest parameter shift was 0.00 times its esd) with unweighted and weighted agreement factors of:

$$R1 = \Sigma ||F_o| - |F_c|| / \Sigma |F_o| = 0.0399$$

$$wR2 = [ \Sigma ( w (F_o^2 - F_c^2)^2 ) / \Sigma w(F_o^2)^2 ]^{1/2} = 0.1007$$

The standard deviation of an observation of unit weight<sup>4</sup> was 1.01. A Sheldrick weighting scheme was used. Plots of  $\Sigma w (|F_o| - |F_c|)^2$  versus  $|F_o|$ , reflection order in data collection,  $\sin \theta/\lambda$  and various classes of indices showed no unusual trends. The maximum and minimum peaks on the final difference Fourier map corresponded to 0.29 and -0.18 e<sup>-</sup>/Å<sup>3</sup>, respectively.

Neutral atom scattering factors were taken from Cromer and Waber<sup>5</sup>. Anomalous dispersion effects were included in  $F_{\text{calc}}$ <sup>6</sup>; the values for  $\Delta f'$  and  $\Delta f''$  were those of Creagh and McAuley<sup>7</sup>. The values for the mass attenuation coefficients are those of Creagh and Hubbell<sup>8</sup>. All calculations were performed using the CrystalStructure<sup>9,10</sup> crystallographic software package.

## References

(1) PATTY: Beurskens, P.T., Admiraal, G., Beurskens, G., Bosman, W.P., Garcia-Granda, S., Gould, R.O., Smits, J.M.M. and Smykalla, C. (1992). The DIRDIF program system, Technical Report of the Crystallography Laboratory, University of Nijmegen, The Netherlands.

(2) DIRDIF99: Beurskens, P.T., Admiraal, G., Beurskens, G., Bosman, W.P., de Gelder, R., Israel, R. and Smits, J.M.M.(1999). The DIRDIF-99 program system, Technical Report of the Crystallography Laboratory, University of Nijmegen, The Netherlands.

(3) Least Squares function minimized:

$$\sum w(F_o^2 - F_c^2)^2 \quad \text{where } w = \text{Least Squares weights.}$$

(4) Standard deviation of an observation of unit weight:

$$[\sum w(F_o^2 - F_c^2)^2 / (N_o - N_v)]^{1/2}$$

where:  $N_o$  = number of observations  
 $N_v$  = number of variables

(5) Cromer, D. T. & Waber, J. T.; "International Tables for X-ray Crystallography", Vol. IV, The Kynoch Press, Birmingham, England, Table 2.2 A (1974).

(6) Ibers, J. A. & Hamilton, W. C.; Acta Crystallogr., 17, 781 (1964).

(7) Creagh, D. C. & McAuley, W.J. ; "International Tables for Crystallography", Vol C, (A.J.C. Wilson, ed.), Kluwer Academic Publishers, Boston, Table 4.2.6.8, pages 219-222 (1992).

(8) Creagh, D. C. & Hubbell, J.H.; "International Tables for Crystallography", Vol C, (A.J.C. Wilson, ed.), Kluwer Academic Publishers, Boston, Table 4.2.4.3, pages 200-206 (1992).

(9) CrystalStructure 3.8: Crystal Structure Analysis Package, Rigaku and Rigaku/MSO (2000-2006). 9009 New Trails Dr. The Woodlands TX 77381 USA.

(10) CRYSTALS Issue 11: Carruthers, J.R., Rollett, J.S., Betteridge, P.W., Kinna, D., Pearce, L., Larsen, A., and Gabe, E. Chemical Crystallography Laboratory, Oxford, UK. (1999)

## EXPERIMENTAL DETAILS

### A. Crystal Data

|                         |                                                                                                |
|-------------------------|------------------------------------------------------------------------------------------------|
| Empirical Formula       | $C_{150}H_{222}O_6Al_{12}N_6$                                                                  |
| Formula Weight          | 2529.22                                                                                        |
| Crystal Color, Habit    | colorless, block                                                                               |
| Crystal Dimensions      | 0.40 X 0.24 X 0.14 mm                                                                          |
| Crystal System          | trigonal                                                                                       |
| Lattice Type            | R-centered                                                                                     |
| Detector Position       | 0.00 mm                                                                                        |
| Pixel Size              | 0.000 mm                                                                                       |
| Lattice Parameters      | $a = 38.5672(11) \text{ \AA}$<br>$c = 9.3498(3) \text{ \AA}$<br>$V = 12044.0(6) \text{ \AA}^3$ |
| Space Group             | R-3 (#148)                                                                                     |
| Z value                 | 3                                                                                              |
| $D_{\text{calc}}$       | 1.046 g/cm <sup>3</sup>                                                                        |
| $F_{000}$               | 4104.00                                                                                        |
| $\mu(\text{MoK}\alpha)$ | 1.226 cm <sup>-1</sup>                                                                         |

## B. Intensity Measurements

|                             |                                                                            |
|-----------------------------|----------------------------------------------------------------------------|
| Diffractometer              | Rigaku RAXIS-RAPID                                                         |
| Radiation                   | MoK $\alpha$ ( $\lambda = 0.71075 \text{ \AA}$ )<br>graphite monochromated |
| Detector Aperture           | 0 mm x 0 mm                                                                |
| Data Images                 | 0 exposures                                                                |
| Detector Position           | 0.00 mm                                                                    |
| Pixel Size                  | 0.000 mm                                                                   |
| $2\theta_{\max}$            | 54.8 $^{\circ}$                                                            |
| No. of Reflections Measured | Total: 58936<br>Unique: 6067 ( $R_{\text{int}} = 0.040$ )                  |
| Corrections                 | Lorentz-polarization<br>Absorption<br>(trans. factors: 0.818 - 0.983)      |



### C. Structure Solution and Refinement

|                                          |                                                |
|------------------------------------------|------------------------------------------------|
| Structure Solution                       | Patterson Methods (DIRDIF99 PATTY)             |
| Refinement                               | Full-matrix least-squares on $F^2$             |
| Function Minimized                       | $\sum w (F_o^2 - F_c^2)^2$                     |
| Least Squares Weights                    | $1/[0.0011F_o^2+1.0000\sigma(F_o^2)]/(4F_o^2)$ |
| $2\theta_{\max}$ cutoff                  | 54.8°                                          |
| Anomalous Dispersion                     | All non-hydrogen atoms                         |
| No. Observations ( $I > 2.00\sigma(I)$ ) | 3181                                           |
| No. Variables                            | 299                                            |
| Reflection/Parameter Ratio               | 10.64                                          |
| Residuals: R1 ( $I > 2.00\sigma(I)$ )    | 0.0399                                         |
| Residuals: wR2 ( $I > 2.00\sigma(I)$ )   | 0.1007                                         |
| Goodness of Fit Indicator                | 1.013                                          |
| Max Shift/Error in Final Cycle           | 0.000                                          |
| Maximum peak in Final Diff. Map          | 0.29 e <sup>-</sup> /Å <sup>3</sup>            |
| Minimum peak in Final Diff. Map          | -0.18 e <sup>-</sup> /Å <sup>3</sup>           |

Table 1. Atomic coordinates and  $B_{iso}/B_{eq}$  and occupancy

| atom  | x           | y           | z           | $B_{eq}$  | occ   |
|-------|-------------|-------------|-------------|-----------|-------|
| Al(1) | 0.43311(2)  | 0.14048(2)  | 0.08157(7)  | 3.178(15) |       |
| Al(2) | 0.52212(2)  | 0.16992(2)  | -0.08220(7) | 3.801(17) |       |
| O(1)  | 0.48729(5)  | 0.17610(4)  | 0.05822(14) | 3.28(3)   |       |
| N(1)  | 0.43975(5)  | 0.13668(5)  | 0.29048(17) | 2.75(3)   |       |
| C(1)  | 0.41306(8)  | 0.08921(8)  | -0.0135(2)  | 4.64(6)   |       |
| C(2)  | 0.40500(8)  | 0.16993(8)  | 0.0538(2)   | 4.83(7)   |       |
| C(3)  | 0.50143(7)  | 0.21004(7)  | 0.1427(2)   | 3.05(5)   |       |
| C(4)  | 0.52389(8)  | 0.24787(7)  | 0.0842(2)   | 4.02(5)   |       |
| C(5)  | 0.53956(8)  | 0.28118(8)  | 0.1708(2)   | 4.61(6)   |       |
| C(6)  | 0.53343(8)  | 0.27775(8)  | 0.3176(2)   | 4.47(6)   |       |
| C(7)  | 0.51030(7)  | 0.24045(7)  | 0.3763(2)   | 3.66(5)   |       |
| C(8)  | 0.49295(6)  | 0.20580(6)  | 0.2906(2)   | 2.79(4)   |       |
| C(9)  | 0.46616(7)  | 0.16792(7)  | 0.3578(2)   | 2.88(4)   |       |
| C(10) | 0.49526(9)  | 0.16890(10) | -0.2620(2)  | 5.68(7)   |       |
| C(11) | 0.57697(8)  | 0.21576(9)  | -0.0607(2)  | 5.32(7)   |       |
| C(12) | 0.52117(10) | 0.12018(9)  | -0.0310(3)  | 6.10(8)   |       |
| C(13) | 0.41376(6)  | 0.10128(6)  | 0.3758(2)   | 3.03(4)   |       |
| C(14) | 0.38146(7)  | 0.09989(7)  | 0.4503(2)   | 3.64(5)   |       |
| C(15) | 0.35704(8)  | 0.06494(8)  | 0.5282(2)   | 4.70(6)   |       |
| C(16) | 0.36488(9)  | 0.03366(9)  | 0.5321(2)   | 5.18(6)   |       |
| C(17) | 0.39714(8)  | 0.03626(7)  | 0.4589(2)   | 4.53(6)   |       |
| C(18) | 0.42207(7)  | 0.06987(7)  | 0.3770(2)   | 3.53(5)   |       |
| C(19) | 0.37287(8)  | 0.13421(8)  | 0.4529(2)   | 4.33(6)   |       |
| C(20) | 0.38166(10) | 0.15348(9)  | 0.6012(3)   | 6.21(8)   |       |
| C(21) | 0.32986(10) | 0.12074(12) | 0.4099(3)   | 7.44(10)  |       |
| C(22) | 0.45842(8)  | 0.07346(8)  | 0.3012(2)   | 4.25(6)   |       |
| C(23) | 0.49429(9)  | 0.09047(11) | 0.4018(3)   | 6.96(9)   |       |
| C(24) | 0.45046(11) | 0.03365(9)  | 0.2362(4)   | 7.59(10)  |       |
| C(25) | 0.6667      | 0.3333      | 0.003(3)    | 19.4(9)   | 0.220 |
| C(26) | 0.6667      | 0.3333      | 0.104(4)    | 20.0(10)  | 0.200 |
| C(27) | 0.6667      | 0.3333      | 0.3333      | 24.5(27)  | 0.080 |
| C(29) | 0.6871(6)   | 0.3431(10)  | 0.2230(19)  | 21.6(9)   | 1/2   |

$$B_{eq} = 8/3 \pi^2 (U_{11}(aa^*)^2 + U_{22}(bb^*)^2 + U_{33}(cc^*)^2 + 2U_{12}(aa^*bb^*)\cos \gamma + 2U_{13}(aa^*cc^*)\cos \beta + 2U_{23}(bb^*cc^*)\cos \alpha)$$

Table 2. Atomic coordinates and  $B_{iso}$  involving hydrogens/ $B_{eq}$  and occupancy

| atom  | x      | y      | z       | $B_{eq}$ | occ |
|-------|--------|--------|---------|----------|-----|
| H(1)  | 0.4335 | 0.0823 | -0.0152 | 5.59     |     |
| H(2)  | 0.3905 | 0.0693 | 0.0371  | 5.60     |     |
| H(3)  | 0.4055 | 0.0910 | -0.1087 | 5.59     |     |
| H(4)  | 0.4185 | 0.1946 | 0.1039  | 6.19     |     |
| H(5)  | 0.4042 | 0.1750 | -0.0453 | 6.20     |     |
| H(6)  | 0.3785 | 0.1546 | 0.0893  | 6.20     |     |
| H(7)  | 0.5281 | 0.2490 | -0.0281 | 4.68     |     |
| H(8)  | 0.5568 | 0.3103 | 0.1354  | 5.30     |     |
| H(9)  | 0.5497 | 0.3055 | 0.3842  | 5.18     |     |
| H(10) | 0.5042 | 0.2352 | 0.4879  | 4.35     |     |
| H(11) | 0.4698 | 0.1660 | 0.4666  | 3.52     |     |
| H(12) | 0.4688 | 0.1467 | -0.2617 | 6.97     |     |
| H(13) | 0.4944 | 0.1930 | -0.2704 | 6.99     |     |
| H(14) | 0.5096 | 0.1666 | -0.3406 | 6.97     |     |
| H(15) | 0.5958 | 0.2078 | -0.0871 | 6.40     |     |
| H(16) | 0.5803 | 0.2372 | -0.1203 | 6.39     |     |
| H(17) | 0.5812 | 0.2243 | 0.0362  | 6.39     |     |
| H(18) | 0.5420 | 0.1188 | -0.0800 | 7.91     |     |
| H(19) | 0.5250 | 0.1198 | 0.0693  | 7.90     |     |
| H(20) | 0.4961 | 0.0979 | -0.0570 | 7.91     |     |
| H(21) | 0.3324 | 0.0632 | 0.5916  | 5.27     |     |
| H(22) | 0.3455 | 0.0087 | 0.5981  | 5.55     |     |
| H(23) | 0.4001 | 0.0097 | 0.4540  | 5.22     |     |
| H(24) | 0.3939 | 0.1575 | 0.3704  | 5.44     |     |
| H(25) | 0.3788 | 0.1766 | 0.6005  | 7.43     |     |
| H(26) | 0.3635 | 0.1347 | 0.6684  | 7.45     |     |
| H(27) | 0.4083 | 0.1609 | 0.6274  | 7.45     |     |
| H(28) | 0.3258 | 0.1431 | 0.4057  | 9.64     |     |
| H(29) | 0.3246 | 0.1082 | 0.3187  | 9.65     |     |
| H(30) | 0.3123 | 0.1021 | 0.4787  | 9.65     |     |
| H(31) | 0.4636 | 0.0927 | 0.2192  | 5.44     |     |
| H(32) | 0.5166 | 0.0915 | 0.3548  | 8.56     |     |
| H(33) | 0.5008 | 0.1167 | 0.4306  | 8.57     |     |
| H(34) | 0.4876 | 0.0737 | 0.4836  | 8.57     |     |
| H(35) | 0.4718 | 0.0378 | 0.1746  | 9.80     |     |
| H(36) | 0.4479 | 0.0157 | 0.3106  | 9.82     |     |
| H(37) | 0.4262 | 0.0225 | 0.1832  | 9.82     |     |

Table 2. Atomic coordinates and  $B_{iso}$  involving hydrogens/ $B_{eq}$  and occupancy (continued)

| atom | x | y | z | $B_{eq}$ | occ |
|------|---|---|---|----------|-----|
|------|---|---|---|----------|-----|

$$B_{eq} = 8/3 \pi^2 (U_{11}(aa^*)^2 + U_{22}(bb^*)^2 + U_{33}(cc^*)^2 + 2U_{12}(aa^*bb^*)\cos \gamma + 2U_{13}(aa^*cc^*)\cos \beta + 2U_{23}(bb^*cc^*)\cos \alpha)$$

Table 3. Anisotropic displacement parameters

| atom  | U <sub>11</sub> | U <sub>22</sub> | U <sub>33</sub> | U <sub>12</sub> | U <sub>13</sub> | U <sub>23</sub> |
|-------|-----------------|-----------------|-----------------|-----------------|-----------------|-----------------|
| Al(1) | 0.0477(4)       | 0.0428(4)       | 0.0326(3)       | 0.0244(3)       | -0.0053(2)      | -0.0041(2)      |
| Al(2) | 0.0561(4)       | 0.0623(5)       | 0.0321(3)       | 0.0341(4)       | 0.0026(3)       | -0.0015(3)      |
| O(1)  | 0.0516(9)       | 0.0410(9)       | 0.0307(7)       | 0.0223(8)       | 0.0030(6)       | -0.0016(6)      |
| N(1)  | 0.0365(10)      | 0.0376(10)      | 0.0325(9)       | 0.0200(9)       | 0.0009(7)       | 0.0028(8)       |
| C(1)  | 0.0636(17)      | 0.0555(16)      | 0.0563(15)      | 0.0289(14)      | -0.0081(13)     | -0.0127(12)     |
| C(2)  | 0.0707(19)      | 0.0692(18)      | 0.0553(15)      | 0.0438(16)      | -0.0162(13)     | -0.0092(13)     |
| C(3)  | 0.0429(13)      | 0.0409(13)      | 0.0347(11)      | 0.0228(11)      | -0.0013(9)      | -0.0009(9)      |
| C(4)  | 0.0612(16)      | 0.0439(15)      | 0.0431(13)      | 0.0229(13)      | 0.0067(11)      | 0.0092(11)      |
| C(5)  | 0.0630(17)      | 0.0376(15)      | 0.0668(17)      | 0.0193(13)      | 0.0029(13)      | 0.0075(12)      |
| C(6)  | 0.0599(17)      | 0.0413(15)      | 0.0618(16)      | 0.0202(13)      | -0.0050(13)     | -0.0071(12)     |
| C(7)  | 0.0499(14)      | 0.0457(15)      | 0.0417(12)      | 0.0226(12)      | -0.0021(10)     | -0.0050(10)     |
| C(8)  | 0.0383(12)      | 0.0383(12)      | 0.0316(10)      | 0.0207(10)      | -0.0025(9)      | 0.0000(9)       |
| C(9)  | 0.0390(12)      | 0.0419(13)      | 0.0310(10)      | 0.0222(11)      | -0.0007(9)      | 0.0008(9)       |
| C(10) | 0.080(2)        | 0.102(2)        | 0.0382(13)      | 0.0483(19)      | 0.0004(13)      | -0.0020(14)     |
| C(11) | 0.0630(18)      | 0.088(2)        | 0.0509(15)      | 0.0377(16)      | 0.0115(13)      | 0.0012(14)      |
| C(12) | 0.079(2)        | 0.083(2)        | 0.088(2)        | 0.0542(19)      | 0.0141(16)      | 0.0026(17)      |
| C(13) | 0.0371(12)      | 0.0372(13)      | 0.0353(10)      | 0.0145(11)      | -0.0011(9)      | 0.0053(9)       |
| C(14) | 0.0416(14)      | 0.0521(15)      | 0.0402(12)      | 0.0201(12)      | 0.0026(10)      | 0.0022(11)      |
| C(15) | 0.0493(16)      | 0.0607(18)      | 0.0568(15)      | 0.0187(14)      | 0.0125(12)      | 0.0104(13)      |
| C(16) | 0.0592(18)      | 0.0538(18)      | 0.0618(16)      | 0.0119(15)      | 0.0088(13)      | 0.0198(13)      |
| C(17) | 0.0611(17)      | 0.0416(15)      | 0.0616(15)      | 0.0199(13)      | -0.0030(13)     | 0.0117(12)      |
| C(18) | 0.0459(14)      | 0.0415(14)      | 0.0440(12)      | 0.0198(12)      | -0.0044(10)     | 0.0046(10)      |
| C(19) | 0.0511(16)      | 0.0644(17)      | 0.0564(15)      | 0.0343(14)      | 0.0111(12)      | 0.0036(13)      |
| C(20) | 0.085(2)        | 0.070(2)        | 0.080(2)        | 0.0383(18)      | 0.0045(17)      | -0.0140(16)     |
| C(21) | 0.078(2)        | 0.112(2)        | 0.115(2)        | 0.064(2)        | -0.020(2)       | -0.025(2)       |
| C(22) | 0.0572(16)      | 0.0514(16)      | 0.0645(16)      | 0.0357(14)      | 0.0037(13)      | 0.0113(12)      |
| C(23) | 0.0582(19)      | 0.113(2)        | 0.100(2)        | 0.0478(19)      | 0.0042(16)      | 0.034(2)        |
| C(24) | 0.115(3)        | 0.070(2)        | 0.126(2)        | 0.063(2)        | 0.033(2)        | 0.0111(19)      |

The general temperature factor expression:  $\exp(-2\pi^2(a^2U_{11}h^2 + b^2U_{22}k^2 + c^2U_{33}l^2 + 2a*b*U_{12}hk + 2a*c*U_{13}hl + 2b*c*U_{23}kl))$

Table 4. Bond lengths (Å)

| atom  | atom                | distance   | atom  | atom                | distance   |
|-------|---------------------|------------|-------|---------------------|------------|
| Al(1) | O(1)                | 1.8522(16) | Al(1) | N(1)                | 1.9849(17) |
| Al(1) | C(1)                | 1.941(2)   | Al(1) | C(2)                | 1.940(3)   |
| Al(2) | O(1)                | 1.9761(19) | Al(2) | C(10)               | 1.965(2)   |
| Al(2) | C(11)               | 1.975(2)   | Al(2) | C(12)               | 1.960(3)   |
| O(1)  | C(3)                | 1.386(2)   | N(1)  | C(9)                | 1.288(2)   |
| N(1)  | C(13)               | 1.462(2)   | C(3)  | C(4)                | 1.384(3)   |
| C(3)  | C(8)                | 1.412(2)   | C(4)  | C(5)                | 1.377(3)   |
| C(5)  | C(6)                | 1.387(3)   | C(6)  | C(7)                | 1.372(3)   |
| C(7)  | C(8)                | 1.407(3)   | C(8)  | C(9)                | 1.445(2)   |
| C(13) | C(14)               | 1.405(3)   | C(13) | C(18)               | 1.399(4)   |
| C(14) | C(15)               | 1.402(3)   | C(14) | C(19)               | 1.517(4)   |
| C(15) | C(16)               | 1.383(5)   | C(16) | C(17)               | 1.379(4)   |
| C(17) | C(18)               | 1.395(3)   | C(18) | C(22)               | 1.514(4)   |
| C(19) | C(20)               | 1.529(3)   | C(19) | C(21)               | 1.524(4)   |
| C(22) | C(23)               | 1.524(4)   | C(22) | C(24)               | 1.533(4)   |
| C(25) | C(26)               | 0.94(5)    | C(26) | C(29)               | 1.31(4)    |
| C(26) | C(29) <sup>1)</sup> | 1.31(4)    | C(26) | C(29) <sup>2)</sup> | 1.31(4)    |
| C(27) | C(29)               | 1.238(19)  | C(27) | C(29) <sup>1)</sup> | 1.24(2)    |
| C(27) | C(29) <sup>2)</sup> | 1.24(2)    | C(27) | C(29) <sup>3)</sup> | 1.238(19)  |
| C(27) | C(29) <sup>4)</sup> | 1.24(2)    | C(27) | C(29) <sup>5)</sup> | 1.24(2)    |
| C(29) | C(29) <sup>1)</sup> | 1.18(4)    | C(29) | C(29) <sup>2)</sup> | 1.18(3)    |

Symmetry Operators:

(1)  $-Y+1, X-Y, Z$

(3)  $-X+1/3+1, -Y+2/3, -Z+2/3$

(5)  $X-Y+1/3, X+2/3-1, -Z+2/3$

(2)  $-X+Y+1, -X+1, Z$

(4)  $Y+1/3, -X+Y+2/3, -Z+2/3$

Table 5. Bond lengths involving hydrogens (Å)

| atom  | atom  | distance | atom  | atom  | distance |
|-------|-------|----------|-------|-------|----------|
| C(1)  | H(1)  | 0.950    | C(1)  | H(2)  | 0.950    |
| C(1)  | H(3)  | 0.950    | C(2)  | H(4)  | 0.950    |
| C(2)  | H(5)  | 0.950    | C(2)  | H(6)  | 0.950    |
| C(4)  | H(7)  | 1.061    | C(5)  | H(8)  | 1.032    |
| C(6)  | H(9)  | 1.122    | C(7)  | H(10) | 1.067    |
| C(9)  | H(11) | 1.034    | C(10) | H(12) | 0.950    |
| C(10) | H(13) | 0.950    | C(10) | H(14) | 0.950    |
| C(11) | H(15) | 0.950    | C(11) | H(16) | 0.950    |
| C(11) | H(17) | 0.950    | C(12) | H(18) | 0.950    |
| C(12) | H(19) | 0.950    | C(12) | H(20) | 0.950    |
| C(15) | H(21) | 1.094    | C(16) | H(22) | 1.072    |
| C(17) | H(23) | 1.088    | C(19) | H(24) | 1.154    |
| C(20) | H(25) | 0.950    | C(20) | H(26) | 0.950    |
| C(20) | H(27) | 0.950    | C(21) | H(28) | 0.950    |
| C(21) | H(29) | 0.950    | C(21) | H(30) | 0.950    |
| C(22) | H(31) | 1.014    | C(23) | H(32) | 0.950    |
| C(23) | H(33) | 0.950    | C(23) | H(34) | 0.950    |
| C(24) | H(35) | 0.950    | C(24) | H(36) | 0.950    |
| C(24) | H(37) | 0.950    |       |       |          |

Table 6. Bond angles (°)

| atom                | atom  | atom                | angle      | atom                | atom  | atom                | angle      |
|---------------------|-------|---------------------|------------|---------------------|-------|---------------------|------------|
| O(1)                | Al(1) | N(1)                | 91.80(6)   | O(1)                | Al(1) | C(1)                | 115.38(11) |
| O(1)                | Al(1) | C(2)                | 107.66(9)  | N(1)                | Al(1) | C(1)                | 112.07(10) |
| N(1)                | Al(1) | C(2)                | 107.79(10) | C(1)                | Al(1) | C(2)                | 118.71(12) |
| O(1)                | Al(2) | C(10)               | 100.81(12) | O(1)                | Al(2) | C(11)               | 108.22(10) |
| O(1)                | Al(2) | C(12)               | 105.94(11) | C(10)               | Al(2) | C(11)               | 115.04(11) |
| C(10)               | Al(2) | C(12)               | 115.97(14) | C(11)               | Al(2) | C(12)               | 109.80(15) |
| Al(1)               | O(1)  | Al(2)               | 124.87(7)  | Al(1)               | O(1)  | C(3)                | 113.49(15) |
| Al(2)               | O(1)  | C(3)                | 121.49(13) | Al(1)               | N(1)  | C(9)                | 118.88(13) |
| Al(1)               | N(1)  | C(13)               | 123.54(11) | C(9)                | N(1)  | C(13)               | 117.34(16) |
| O(1)                | C(3)  | C(4)                | 120.93(18) | O(1)                | C(3)  | C(8)                | 119.34(18) |
| C(4)                | C(3)  | C(8)                | 119.7(2)   | C(3)                | C(4)  | C(5)                | 120.2(2)   |
| C(4)                | C(5)  | C(6)                | 121.2(2)   | C(5)                | C(6)  | C(7)                | 119.1(2)   |
| C(6)                | C(7)  | C(8)                | 121.3(2)   | C(3)                | C(8)  | C(7)                | 118.35(18) |
| C(3)                | C(8)  | C(9)                | 123.39(18) | C(7)                | C(8)  | C(9)                | 118.22(18) |
| N(1)                | C(9)  | C(8)                | 124.38(18) | N(1)                | C(13) | C(14)               | 119.2(2)   |
| N(1)                | C(13) | C(18)               | 117.8(2)   | C(14)               | C(13) | C(18)               | 123.07(19) |
| C(13)               | C(14) | C(15)               | 116.8(2)   | C(13)               | C(14) | C(19)               | 123.45(19) |
| C(15)               | C(14) | C(19)               | 119.7(2)   | C(14)               | C(15) | C(16)               | 121.2(2)   |
| C(15)               | C(16) | C(17)               | 120.4(2)   | C(16)               | C(17) | C(18)               | 121.2(3)   |
| C(13)               | C(18) | C(17)               | 117.3(2)   | C(13)               | C(18) | C(22)               | 121.30(19) |
| C(17)               | C(18) | C(22)               | 121.2(2)   | C(14)               | C(19) | C(20)               | 110.3(2)   |
| C(14)               | C(19) | C(21)               | 111.9(2)   | C(20)               | C(19) | C(21)               | 110.1(2)   |
| C(18)               | C(22) | C(23)               | 110.5(2)   | C(18)               | C(22) | C(24)               | 112.4(2)   |
| C(23)               | C(22) | C(24)               | 111.1(3)   | C(25)               | C(26) | C(29)               | 148.5(14)  |
| C(25)               | C(26) | C(29) <sup>1)</sup> | 148.5(18)  | C(25)               | C(26) | C(29) <sup>2)</sup> | 148.5(16)  |
| C(29)               | C(26) | C(29) <sup>1)</sup> | 54(2)      | C(29)               | C(26) | C(29) <sup>2)</sup> | 54(2)      |
| C(29) <sup>1)</sup> | C(26) | C(29) <sup>2)</sup> | 54(2)      | C(29)               | C(27) | C(29) <sup>1)</sup> | 57.2(19)   |
| C(29)               | C(27) | C(29) <sup>2)</sup> | 57.2(14)   | C(29)               | C(27) | C(29) <sup>3)</sup> | 180(2)     |
| C(29)               | C(27) | C(29) <sup>4)</sup> | 122.8(19)  | C(29)               | C(27) | C(29) <sup>5)</sup> | 122.8(14)  |
| C(29) <sup>1)</sup> | C(27) | C(29) <sup>2)</sup> | 57(2)      | C(29) <sup>1)</sup> | C(27) | C(29) <sup>3)</sup> | 123(2)     |
| C(29) <sup>1)</sup> | C(27) | C(29) <sup>4)</sup> | 180(2)     | C(29) <sup>1)</sup> | C(27) | C(29) <sup>5)</sup> | 123(2)     |
| C(29) <sup>2)</sup> | C(27) | C(29) <sup>3)</sup> | 122.8(14)  | C(29) <sup>2)</sup> | C(27) | C(29) <sup>4)</sup> | 123(2)     |
| C(29) <sup>2)</sup> | C(27) | C(29) <sup>5)</sup> | 180(2)     | C(29) <sup>3)</sup> | C(27) | C(29) <sup>4)</sup> | 57.2(19)   |
| C(29) <sup>3)</sup> | C(27) | C(29) <sup>5)</sup> | 57.2(14)   | C(29) <sup>4)</sup> | C(27) | C(29) <sup>5)</sup> | 57(2)      |
| C(26)               | C(29) | C(27)               | 114.9(19)  | C(26)               | C(29) | C(29) <sup>1)</sup> | 63.1(17)   |
| C(26)               | C(29) | C(29) <sup>2)</sup> | 63.1(16)   | C(27)               | C(29) | C(29) <sup>1)</sup> | 61.4(15)   |
| C(27)               | C(29) | C(29) <sup>2)</sup> | 61.4(14)   | C(29) <sup>1)</sup> | C(29) | C(29) <sup>2)</sup> | 60(2)      |



Table 6. Bond angles ( $^{\circ}$ ) (continued)

| atom | atom | atom | angle | atom | atom | atom | angle |
|------|------|------|-------|------|------|------|-------|
|------|------|------|-------|------|------|------|-------|

Symmetry Operators:

(1)  $-Y+1, X-Y, Z$

(3)  $-X+1/3+1, -Y+2/3, -Z+2/3$

(5)  $X-Y+1/3, X+2/3-1, -Z+2/3$

(2)  $-X+Y+1, -X+1, Z$

(4)  $Y+1/3, -X+Y+2/3, -Z+2/3$

Table 7. Bond angles involving hydrogens ( $^{\circ}$ )

| atom  | atom  | atom  | angle | atom  | atom  | atom  | angle |
|-------|-------|-------|-------|-------|-------|-------|-------|
| Al(1) | C(1)  | H(1)  | 109.3 | Al(1) | C(1)  | H(2)  | 109.5 |
| Al(1) | C(1)  | H(3)  | 109.6 | H(1)  | C(1)  | H(2)  | 109.5 |
| H(1)  | C(1)  | H(3)  | 109.5 | H(2)  | C(1)  | H(3)  | 109.5 |
| Al(1) | C(2)  | H(4)  | 109.4 | Al(1) | C(2)  | H(5)  | 109.7 |
| Al(1) | C(2)  | H(6)  | 109.3 | H(4)  | C(2)  | H(5)  | 109.5 |
| H(4)  | C(2)  | H(6)  | 109.5 | H(5)  | C(2)  | H(6)  | 109.5 |
| C(3)  | C(4)  | H(7)  | 115.9 | C(5)  | C(4)  | H(7)  | 123.9 |
| C(4)  | C(5)  | H(8)  | 124.7 | C(6)  | C(5)  | H(8)  | 114.0 |
| C(5)  | C(6)  | H(9)  | 118.1 | C(7)  | C(6)  | H(9)  | 122.6 |
| C(6)  | C(7)  | H(10) | 123.8 | C(8)  | C(7)  | H(10) | 114.9 |
| N(1)  | C(9)  | H(11) | 119.0 | C(8)  | C(9)  | H(11) | 116.5 |
| Al(2) | C(10) | H(12) | 109.5 | Al(2) | C(10) | H(13) | 109.1 |
| Al(2) | C(10) | H(14) | 109.7 | H(12) | C(10) | H(13) | 109.5 |
| H(12) | C(10) | H(14) | 109.5 | H(13) | C(10) | H(14) | 109.5 |
| Al(2) | C(11) | H(15) | 109.5 | Al(2) | C(11) | H(16) | 109.7 |
| Al(2) | C(11) | H(17) | 109.3 | H(15) | C(11) | H(16) | 109.5 |
| H(15) | C(11) | H(17) | 109.5 | H(16) | C(11) | H(17) | 109.5 |
| Al(2) | C(12) | H(18) | 109.5 | Al(2) | C(12) | H(19) | 109.2 |
| Al(2) | C(12) | H(20) | 109.7 | H(18) | C(12) | H(19) | 109.5 |
| H(18) | C(12) | H(20) | 109.5 | H(19) | C(12) | H(20) | 109.5 |
| C(14) | C(15) | H(21) | 119.1 | C(16) | C(15) | H(21) | 119.6 |
| C(15) | C(16) | H(22) | 116.2 | C(17) | C(16) | H(22) | 123.3 |
| C(16) | C(17) | H(23) | 117.9 | C(18) | C(17) | H(23) | 120.3 |
| C(14) | C(19) | H(24) | 107.0 | C(20) | C(19) | H(24) | 109.2 |
| C(21) | C(19) | H(24) | 108.1 | C(19) | C(20) | H(25) | 110.3 |
| C(19) | C(20) | H(26) | 109.2 | C(19) | C(20) | H(27) | 108.9 |
| H(25) | C(20) | H(26) | 109.5 | H(25) | C(20) | H(27) | 109.5 |
| H(26) | C(20) | H(27) | 109.5 | C(19) | C(21) | H(28) | 110.3 |
| C(19) | C(21) | H(29) | 109.2 | C(19) | C(21) | H(30) | 108.9 |
| H(28) | C(21) | H(29) | 109.5 | H(28) | C(21) | H(30) | 109.5 |
| H(29) | C(21) | H(30) | 109.5 | C(18) | C(22) | H(31) | 104.8 |
| C(23) | C(22) | H(31) | 110.3 | C(24) | C(22) | H(31) | 107.5 |
| C(22) | C(23) | H(32) | 110.0 | C(22) | C(23) | H(33) | 109.4 |
| C(22) | C(23) | H(34) | 108.9 | H(32) | C(23) | H(33) | 109.5 |
| H(32) | C(23) | H(34) | 109.5 | H(33) | C(23) | H(34) | 109.5 |
| C(22) | C(24) | H(35) | 110.3 | C(22) | C(24) | H(36) | 109.6 |
| C(22) | C(24) | H(37) | 108.5 | H(35) | C(24) | H(36) | 109.5 |

Table 7. Bond angles involving hydrogens ( $^{\circ}$ ) (continued)

|       |       |       |       |       |       |       |       |
|-------|-------|-------|-------|-------|-------|-------|-------|
| atom  | atom  | atom  | angle | atom  | atom  | atom  | angle |
| H(35) | C(24) | H(37) | 109.5 | H(36) | C(24) | H(37) | 109.5 |

Table 8. Torsion Angles(°)

| atom1               | atom2 | atom3               | atom4               | angle       | atom1               | atom2 | atom3               | atom4               | angle       |
|---------------------|-------|---------------------|---------------------|-------------|---------------------|-------|---------------------|---------------------|-------------|
| O(1)                | Al(1) | N(1)                | C(9)                | 34.3(2)     | O(1)                | Al(1) | N(1)                | C(13)               | -151.5(2)   |
| N(1)                | Al(1) | O(1)                | Al(2)               | 128.13(12)  | N(1)                | Al(1) | O(1)                | C(3)                | -56.35(17)  |
| C(1)                | Al(1) | O(1)                | Al(2)               | 12.60(16)   | C(1)                | Al(1) | O(1)                | C(3)                | -171.88(17) |
| C(2)                | Al(1) | O(1)                | Al(2)               | -122.55(13) | C(2)                | Al(1) | O(1)                | C(3)                | 52.97(18)   |
| C(1)                | Al(1) | N(1)                | C(9)                | 152.7(2)    | C(1)                | Al(1) | N(1)                | C(13)               | -33.1(2)    |
| C(2)                | Al(1) | N(1)                | C(9)                | -74.9(2)    | C(2)                | Al(1) | N(1)                | C(13)               | 99.3(2)     |
| C(10)               | Al(2) | O(1)                | Al(1)               | 59.49(14)   | C(10)               | Al(2) | O(1)                | C(3)                | -115.69(19) |
| C(11)               | Al(2) | O(1)                | Al(1)               | -179.42(13) | C(11)               | Al(2) | O(1)                | C(3)                | 5.4(2)      |
| C(12)               | Al(2) | O(1)                | Al(1)               | -61.72(15)  | C(12)               | Al(2) | O(1)                | C(3)                | 123.10(19)  |
| Al(1)               | O(1)  | C(3)                | C(4)                | -129.8(2)   | Al(1)               | O(1)  | C(3)                | C(8)                | 50.7(3)     |
| Al(2)               | O(1)  | C(3)                | C(4)                | 45.9(3)     | Al(2)               | O(1)  | C(3)                | C(8)                | -133.6(2)   |
| Al(1)               | N(1)  | C(9)                | C(8)                | -2.7(4)     | Al(1)               | N(1)  | C(13)               | C(14)               | -96.1(2)    |
| Al(1)               | N(1)  | C(13)               | C(18)               | 82.8(2)     | C(9)                | N(1)  | C(13)               | C(14)               | 78.2(3)     |
| C(9)                | N(1)  | C(13)               | C(18)               | -102.9(2)   | C(13)               | N(1)  | C(9)                | C(8)                | -177.2(2)   |
| O(1)                | C(3)  | C(4)                | C(5)                | -176.4(2)   | O(1)                | C(3)  | C(8)                | C(7)                | 174.9(2)    |
| O(1)                | C(3)  | C(8)                | C(9)                | -7.5(4)     | C(4)                | C(3)  | C(8)                | C(7)                | -4.7(4)     |
| C(4)                | C(3)  | C(8)                | C(9)                | 172.9(2)    | C(8)                | C(3)  | C(4)                | C(5)                | 3.1(4)      |
| C(3)                | C(4)  | C(5)                | C(6)                | 0.2(4)      | C(4)                | C(5)  | C(6)                | C(7)                | -1.9(5)     |
| C(5)                | C(6)  | C(7)                | C(8)                | 0.3(4)      | C(6)                | C(7)  | C(8)                | C(3)                | 3.0(4)      |
| C(6)                | C(7)  | C(8)                | C(9)                | -174.7(2)   | C(3)                | C(8)  | C(9)                | N(1)                | -18.8(4)    |
| C(7)                | C(8)  | C(9)                | N(1)                | 158.7(2)    | N(1)                | C(13) | C(14)               | C(15)               | 178.81(18)  |
| N(1)                | C(13) | C(14)               | C(19)               | -2.9(3)     | N(1)                | C(13) | C(18)               | C(17)               | 179.89(18)  |
| N(1)                | C(13) | C(18)               | C(22)               | 4.2(2)      | C(14)               | C(13) | C(18)               | C(17)               | -1.3(3)     |
| C(14)               | C(13) | C(18)               | C(22)               | -176.9(2)   | C(18)               | C(13) | C(14)               | C(15)               | -0.0(2)     |
| C(18)               | C(13) | C(14)               | C(19)               | 178.3(2)    | C(13)               | C(14) | C(15)               | C(16)               | 0.7(3)      |
| C(13)               | C(14) | C(19)               | C(20)               | -109.7(2)   | C(13)               | C(14) | C(19)               | C(21)               | 127.4(2)    |
| C(15)               | C(14) | C(19)               | C(20)               | 68.6(2)     | C(15)               | C(14) | C(19)               | C(21)               | -54.3(3)    |
| C(19)               | C(14) | C(15)               | C(16)               | -177.7(2)   | C(14)               | C(15) | C(16)               | C(17)               | 0.0(3)      |
| C(15)               | C(16) | C(17)               | C(18)               | -1.4(3)     | C(16)               | C(17) | C(18)               | C(13)               | 2.0(3)      |
| C(16)               | C(17) | C(18)               | C(22)               | 177.6(2)    | C(13)               | C(18) | C(22)               | C(23)               | 90.1(3)     |
| C(13)               | C(18) | C(22)               | C(24)               | -145.1(2)   | C(17)               | C(18) | C(22)               | C(23)               | -85.3(3)    |
| C(17)               | C(18) | C(22)               | C(24)               | 39.4(3)     | C(25)               | C(26) | C(29)               | C(29) <sup>1)</sup> | 146(2)      |
| C(25)               | C(26) | C(29)               | C(29) <sup>2)</sup> | -146(2)     | C(25)               | C(26) | C(29) <sup>1)</sup> | C(29)               | -146(2)     |
| C(25)               | C(26) | C(29) <sup>1)</sup> | C(29) <sup>2)</sup> | 145.9(18)   | C(25)               | C(26) | C(29) <sup>2)</sup> | C(29)               | 146(2)      |
| C(25)               | C(26) | C(29) <sup>2)</sup> | C(29) <sup>1)</sup> | -146(2)     | C(29)               | C(26) | C(29) <sup>1)</sup> | C(27)               | -34(2)      |
| C(29)               | C(26) | C(29) <sup>1)</sup> | C(29) <sup>2)</sup> | -68(2)      | C(29) <sup>1)</sup> | C(26) | C(29)               | C(27)               | 34(2)       |
| C(29) <sup>1)</sup> | C(26) | C(29)               | C(29) <sup>2)</sup> | 68(2)       | C(29)               | C(26) | C(29) <sup>2)</sup> | C(27)               | 34(2)       |

Table 8. Torsion angles ( $^{\circ}$ ) (continued)

| atom1              | atom2 | atom3              | atom4              | angle      | atom1              | atom2 | atom3              | atom4              | angle     |
|--------------------|-------|--------------------|--------------------|------------|--------------------|-------|--------------------|--------------------|-----------|
| C(29)              | C(26) | C(29) <sup>2</sup> | C(29) <sup>1</sup> | 68(2)      | C(29) <sup>2</sup> | C(26) | C(29)              | C(27)              | -34(2)    |
| C(29) <sup>2</sup> | C(26) | C(29)              | C(29) <sup>1</sup> | -68(2)     | C(29) <sup>1</sup> | C(26) | C(29) <sup>2</sup> | C(27)              | -34(2)    |
| C(29) <sup>1</sup> | C(26) | C(29) <sup>2</sup> | C(29)              | -68(2)     | C(29) <sup>2</sup> | C(26) | C(29) <sup>1</sup> | C(27)              | 34.1(18)  |
| C(29) <sup>2</sup> | C(26) | C(29) <sup>1</sup> | C(29)              | 68(2)      | C(29)              | C(27) | C(29) <sup>1</sup> | C(26)              | 35(2)     |
| C(29)              | C(27) | C(29) <sup>1</sup> | C(29) <sup>2</sup> | 69(2)      | C(29) <sup>1</sup> | C(27) | C(29)              | C(26)              | -35(2)    |
| C(29) <sup>1</sup> | C(27) | C(29)              | C(29) <sup>2</sup> | -69(2)     | C(29)              | C(27) | C(29) <sup>2</sup> | C(26)              | -35(2)    |
| C(29)              | C(27) | C(29) <sup>2</sup> | C(29) <sup>1</sup> | -69(2)     | C(29) <sup>2</sup> | C(27) | C(29)              | C(26)              | 35(2)     |
| C(29) <sup>2</sup> | C(27) | C(29)              | C(29) <sup>1</sup> | 69(2)      | C(29)              | C(27) | C(29) <sup>3</sup> | C(26) <sup>3</sup> | -113(195) |
| C(29) <sup>3</sup> | C(27) | C(29)              | C(26)              | -67(196)   | C(29) <sup>3</sup> | C(27) | C(29)              | C(29) <sup>1</sup> | -32(260)  |
| C(29) <sup>3</sup> | C(27) | C(29)              | C(29) <sup>2</sup> | -102(73)   | C(29) <sup>4</sup> | C(27) | C(29)              | C(26)              | 145(2)    |
| C(29) <sup>4</sup> | C(27) | C(29)              | C(29) <sup>1</sup> | -180(2)    | C(29) <sup>4</sup> | C(27) | C(29)              | C(29) <sup>2</sup> | 111(2)    |
| C(29) <sup>5</sup> | C(27) | C(29)              | C(26)              | -145(2)    | C(29) <sup>5</sup> | C(27) | C(29)              | C(29) <sup>1</sup> | -111(2)   |
| C(29) <sup>5</sup> | C(27) | C(29)              | C(29) <sup>2</sup> | -180(3)    | C(29) <sup>1</sup> | C(27) | C(29) <sup>2</sup> | C(26)              | 35(2)     |
| C(29) <sup>1</sup> | C(27) | C(29) <sup>2</sup> | C(29)              | 69(2)      | C(29) <sup>2</sup> | C(27) | C(29) <sup>1</sup> | C(26)              | -34.7(17) |
| C(29) <sup>2</sup> | C(27) | C(29) <sup>1</sup> | C(29)              | -69(2)     | C(29) <sup>1</sup> | C(27) | C(29) <sup>3</sup> | C(26) <sup>3</sup> | -145(2)   |
| C(29) <sup>3</sup> | C(27) | C(29) <sup>1</sup> | C(26)              | -145(2)    | C(29) <sup>3</sup> | C(27) | C(29) <sup>1</sup> | C(29)              | 180(2)    |
| C(29) <sup>3</sup> | C(27) | C(29) <sup>1</sup> | C(29) <sup>2</sup> | -111(2)    | C(29) <sup>4</sup> | C(27) | C(29) <sup>1</sup> | C(26)              | -178(203) |
| C(29) <sup>4</sup> | C(27) | C(29) <sup>1</sup> | C(29)              | 147(210)   | C(29) <sup>4</sup> | C(27) | C(29) <sup>1</sup> | C(29) <sup>2</sup> | -143(112) |
| C(29) <sup>5</sup> | C(27) | C(29) <sup>1</sup> | C(26)              | 145.3(17)  | C(29) <sup>5</sup> | C(27) | C(29) <sup>1</sup> | C(29)              | 111(2)    |
| C(29) <sup>5</sup> | C(27) | C(29) <sup>1</sup> | C(29) <sup>2</sup> | -180.0(16) | C(29) <sup>2</sup> | C(27) | C(29) <sup>3</sup> | C(26) <sup>3</sup> | 145(2)    |
| C(29) <sup>3</sup> | C(27) | C(29) <sup>2</sup> | C(26)              | 145(2)     | C(29) <sup>3</sup> | C(27) | C(29) <sup>2</sup> | C(29)              | 180(3)    |
| C(29) <sup>3</sup> | C(27) | C(29) <sup>2</sup> | C(29) <sup>1</sup> | 111(2)     | C(29) <sup>4</sup> | C(27) | C(29) <sup>2</sup> | C(26)              | -145(2)   |
| C(29) <sup>4</sup> | C(27) | C(29) <sup>2</sup> | C(29)              | -111(2)    | C(29) <sup>4</sup> | C(27) | C(29) <sup>2</sup> | C(29) <sup>1</sup> | 180.0(16) |
| C(29) <sup>5</sup> | C(27) | C(29) <sup>2</sup> | C(26)              | 70(161)    | C(29) <sup>5</sup> | C(27) | C(29) <sup>2</sup> | C(29)              | 105(104)  |
| C(29) <sup>5</sup> | C(27) | C(29) <sup>2</sup> | C(29) <sup>1</sup> | 35(202)    | C(29) <sup>4</sup> | C(27) | C(29) <sup>3</sup> | C(26) <sup>3</sup> | 35(2)     |
| C(29) <sup>5</sup> | C(27) | C(29) <sup>3</sup> | C(26) <sup>3</sup> | -35(2)     | C(26)              | C(29) | C(29) <sup>1</sup> | C(27)              | 145(2)    |
| C(26)              | C(29) | C(29) <sup>1</sup> | C(29) <sup>2</sup> | 72.9(17)   | C(26)              | C(29) | C(29) <sup>2</sup> | C(27)              | -145(2)   |
| C(26)              | C(29) | C(29) <sup>2</sup> | C(29) <sup>1</sup> | -73.0(19)  | C(27)              | C(29) | C(29) <sup>1</sup> | C(26)              | -145(2)   |
| C(27)              | C(29) | C(29) <sup>1</sup> | C(29) <sup>2</sup> | -71.7(16)  | C(27)              | C(29) | C(29) <sup>2</sup> | C(26)              | 145(2)    |
| C(27)              | C(29) | C(29) <sup>2</sup> | C(29) <sup>1</sup> | 71.7(18)   | C(29) <sup>1</sup> | C(29) | C(29) <sup>2</sup> | C(26)              | 73.0(19)  |
| C(29) <sup>1</sup> | C(29) | C(29) <sup>2</sup> | C(27)              | -71.7(18)  | C(29) <sup>2</sup> | C(29) | C(29) <sup>1</sup> | C(26)              | -72.9(17) |
| C(29) <sup>2</sup> | C(29) | C(29) <sup>1</sup> | C(27)              | 71.7(16)   |                    |       |                    |                    |           |

Symmetry Operators:

- |                            |                           |
|----------------------------|---------------------------|
| (1) -Y+1,X-Y,Z             | (2) -X+Y+1,-X+1,Z         |
| (3) -X+1/3+1,-Y+2/3,-Z+2/3 | (4) Y+1/3,-X+Y+2/3,-Z+2/3 |
| (5) X-Y+1/3,X+2/3-1,-Z+2/3 |                           |

The sign is positive if when looking from atom 2 to atom 3 a clock-wise motion of atom 1 would superimpose it on atom 4.

Table 9. Distances beyond the asymmetric unit out to 3.60 Å

| atom  | atom                | distance | atom | atom | distance |
|-------|---------------------|----------|------|------|----------|
| C(25) | C(25) <sup>1)</sup> | 3.18(4)  |      |      |          |

Symmetry Operators:

(1)  $-X+1/3+1, -Y+2/3, -Z+2/3-1$

Table 10. Distances beyond the asymmetric unit out to 3.60 Å involving hydrogens

| atom  | atom                | distance | atom  | atom                | distance |
|-------|---------------------|----------|-------|---------------------|----------|
| C(1)  | H(21) <sup>1</sup>  | 3.199    | C(1)  | H(23) <sup>2</sup>  | 3.274    |
| C(2)  | H(28) <sup>3</sup>  | 3.172    | C(2)  | H(32) <sup>4</sup>  | 3.453    |
| C(2)  | H(34) <sup>4</sup>  | 3.380    | C(2)  | H(36) <sup>2</sup>  | 3.186    |
| C(3)  | H(9) <sup>5</sup>   | 3.108    | C(4)  | H(9) <sup>5</sup>   | 3.420    |
| C(4)  | H(14) <sup>6</sup>  | 3.551    | C(4)  | H(15) <sup>6</sup>  | 3.257    |
| C(5)  | H(14) <sup>6</sup>  | 3.140    | C(5)  | H(33) <sup>4</sup>  | 3.534    |
| C(6)  | H(9) <sup>5</sup>   | 3.553    | C(6)  | H(17) <sup>4</sup>  | 3.130    |
| C(6)  | H(33) <sup>4</sup>  | 3.401    | C(7)  | H(8) <sup>5</sup>   | 3.388    |
| C(7)  | H(9) <sup>5</sup>   | 3.280    | C(7)  | H(17) <sup>4</sup>  | 3.353    |
| C(7)  | H(19) <sup>4</sup>  | 3.403    | C(7)  | H(32) <sup>4</sup>  | 3.371    |
| C(8)  | H(9) <sup>5</sup>   | 3.079    | C(8)  | H(32) <sup>4</sup>  | 3.529    |
| C(9)  | H(14) <sup>7</sup>  | 3.293    | C(10) | H(8) <sup>8</sup>   | 3.455    |
| C(10) | H(10) <sup>9</sup>  | 3.353    | C(10) | H(11) <sup>9</sup>  | 2.703    |
| C(10) | H(27) <sup>9</sup>  | 3.374    | C(10) | H(33) <sup>9</sup>  | 3.577    |
| C(11) | H(7) <sup>8</sup>   | 2.978    | C(11) | H(9) <sup>5</sup>   | 3.208    |
| C(11) | H(10) <sup>5</sup>  | 3.265    | C(12) | H(10) <sup>5</sup>  | 3.369    |
| C(12) | H(25) <sup>5</sup>  | 3.322    | C(12) | H(27) <sup>5</sup>  | 3.571    |
| C(15) | H(22) <sup>2</sup>  | 3.206    | C(15) | H(37) <sup>10</sup> | 3.555    |
| C(16) | H(2) <sup>11</sup>  | 3.535    | C(16) | H(22) <sup>2</sup>  | 2.864    |
| C(17) | H(2) <sup>11</sup>  | 3.234    | C(17) | H(22) <sup>2</sup>  | 3.028    |
| C(17) | H(29) <sup>11</sup> | 3.282    | C(18) | H(22) <sup>2</sup>  | 3.485    |
| C(20) | H(5) <sup>7</sup>   | 3.413    | C(20) | H(18) <sup>4</sup>  | 3.442    |
| C(20) | H(35) <sup>4</sup>  | 3.432    | C(21) | H(5) <sup>3</sup>   | 3.565    |
| C(21) | H(23) <sup>2</sup>  | 3.580    | C(21) | H(34) <sup>2</sup>  | 3.382    |
| C(23) | H(4) <sup>5</sup>   | 2.949    | C(23) | H(29) <sup>11</sup> | 3.598    |
| C(24) | H(6) <sup>11</sup>  | 3.384    | C(24) | H(21) <sup>1</sup>  | 3.414    |
| C(24) | H(25) <sup>5</sup>  | 3.466    | C(24) | H(26) <sup>1</sup>  | 3.147    |
| C(29) | H(8) <sup>12</sup>  | 3.502    | C(29) | H(9) <sup>13</sup>  | 3.470    |
| H(1)  | H(21) <sup>1</sup>  | 2.778    | H(1)  | H(30) <sup>1</sup>  | 3.326    |
| H(2)  | C(16) <sup>2</sup>  | 3.535    | H(2)  | C(17) <sup>2</sup>  | 3.234    |
| H(2)  | H(21) <sup>1</sup>  | 2.971    | H(2)  | H(22) <sup>1</sup>  | 2.995    |
| H(2)  | H(22) <sup>2</sup>  | 3.313    | H(2)  | H(23) <sup>2</sup>  | 2.502    |
| H(2)  | H(36) <sup>2</sup>  | 3.567    | H(2)  | H(37) <sup>2</sup>  | 3.555    |
| H(3)  | H(21) <sup>1</sup>  | 3.344    | H(3)  | H(22) <sup>1</sup>  | 3.589    |
| H(3)  | H(23) <sup>2</sup>  | 3.483    | H(3)  | H(26) <sup>9</sup>  | 3.540    |
| H(3)  | H(37) <sup>2</sup>  | 3.348    | H(4)  | C(23) <sup>4</sup>  | 2.949    |
| H(4)  | H(28) <sup>3</sup>  | 3.349    | H(4)  | H(32) <sup>4</sup>  | 2.584    |

Table 10. Distances beyond the asymmetric unit out to 3.60 Å involving hydrogens (continued)

| atom  | atom                 | distance | atom  | atom                 | distance |
|-------|----------------------|----------|-------|----------------------|----------|
| H(4)  | H(33) <sup>4)</sup>  | 3.222    | H(4)  | H(34) <sup>4)</sup>  | 2.602    |
| H(5)  | C(20) <sup>9)</sup>  | 3.413    | H(5)  | C(21) <sup>3)</sup>  | 3.565    |
| H(5)  | H(18) <sup>6)</sup>  | 3.048    | H(5)  | H(25) <sup>9)</sup>  | 3.463    |
| H(5)  | H(26) <sup>9)</sup>  | 3.100    | H(5)  | H(27) <sup>9)</sup>  | 3.126    |
| H(5)  | H(28) <sup>3)</sup>  | 2.795    | H(5)  | H(36) <sup>2)</sup>  | 3.165    |
| H(6)  | C(24) <sup>2)</sup>  | 3.384    | H(6)  | H(23) <sup>2)</sup>  | 3.277    |
| H(6)  | H(28) <sup>3)</sup>  | 2.878    | H(6)  | H(32) <sup>4)</sup>  | 3.576    |
| H(6)  | H(34) <sup>4)</sup>  | 3.486    | H(6)  | H(36) <sup>2)</sup>  | 2.486    |
| H(7)  | C(11) <sup>6)</sup>  | 2.978    | H(7)  | H(14) <sup>6)</sup>  | 3.567    |
| H(7)  | H(15) <sup>6)</sup>  | 2.269    | H(7)  | H(16) <sup>6)</sup>  | 3.038    |
| H(7)  | H(18) <sup>6)</sup>  | 3.528    | H(8)  | C(7) <sup>4)</sup>   | 3.388    |
| H(8)  | C(10) <sup>6)</sup>  | 3.455    | H(8)  | C(29) <sup>14)</sup> | 3.502    |
| H(8)  | H(10) <sup>4)</sup>  | 3.193    | H(8)  | H(13) <sup>6)</sup>  | 3.436    |
| H(8)  | H(14) <sup>6)</sup>  | 2.762    | H(8)  | H(16) <sup>6)</sup>  | 3.299    |
| H(9)  | C(3) <sup>4)</sup>   | 3.108    | H(9)  | C(4) <sup>4)</sup>   | 3.420    |
| H(9)  | C(6) <sup>4)</sup>   | 3.553    | H(9)  | C(7) <sup>4)</sup>   | 3.280    |
| H(9)  | C(8) <sup>4)</sup>   | 3.079    | H(9)  | C(11) <sup>4)</sup>  | 3.208    |
| H(9)  | C(29) <sup>13)</sup> | 3.470    | H(9)  | H(15) <sup>4)</sup>  | 3.575    |
| H(9)  | H(17) <sup>4)</sup>  | 2.317    | H(10) | C(10) <sup>7)</sup>  | 3.353    |
| H(10) | C(11) <sup>4)</sup>  | 3.265    | H(10) | C(12) <sup>4)</sup>  | 3.369    |
| H(10) | H(8) <sup>5)</sup>   | 3.193    | H(10) | H(13) <sup>7)</sup>  | 2.698    |
| H(10) | H(14) <sup>7)</sup>  | 3.187    | H(10) | H(15) <sup>4)</sup>  | 2.940    |
| H(10) | H(17) <sup>4)</sup>  | 2.893    | H(10) | H(18) <sup>4)</sup>  | 3.260    |
| H(10) | H(19) <sup>4)</sup>  | 2.820    | H(10) | H(32) <sup>4)</sup>  | 3.589    |
| H(11) | C(10) <sup>7)</sup>  | 2.703    | H(11) | H(12) <sup>7)</sup>  | 2.642    |
| H(11) | H(13) <sup>7)</sup>  | 2.654    | H(11) | H(14) <sup>7)</sup>  | 2.360    |
| H(12) | H(11) <sup>9)</sup>  | 2.642    | H(12) | H(27) <sup>9)</sup>  | 2.845    |
| H(12) | H(33) <sup>9)</sup>  | 3.546    | H(13) | H(8) <sup>8)</sup>   | 3.436    |
| H(13) | H(10) <sup>9)</sup>  | 2.698    | H(13) | H(11) <sup>9)</sup>  | 2.654    |
| H(13) | H(15) <sup>6)</sup>  | 2.877    | H(13) | H(18) <sup>6)</sup>  | 3.104    |
| H(13) | H(27) <sup>9)</sup>  | 3.059    | H(14) | C(4) <sup>8)</sup>   | 3.551    |
| H(14) | C(5) <sup>8)</sup>   | 3.140    | H(14) | C(9) <sup>9)</sup>   | 3.293    |
| H(14) | H(7) <sup>8)</sup>   | 3.567    | H(14) | H(8) <sup>8)</sup>   | 2.762    |
| H(14) | H(10) <sup>9)</sup>  | 3.187    | H(14) | H(11) <sup>9)</sup>  | 2.360    |
| H(14) | H(33) <sup>9)</sup>  | 2.784    | H(15) | C(4) <sup>8)</sup>   | 3.257    |
| H(15) | H(7) <sup>8)</sup>   | 2.269    | H(15) | H(9) <sup>5)</sup>   | 3.575    |
| H(15) | H(10) <sup>5)</sup>  | 2.940    | H(15) | H(13) <sup>8)</sup>  | 2.877    |



Table 10. Distances beyond the asymmetric unit out to 3.60 Å involving hydrogens (continued)

| atom  | atom                 | distance | atom  | atom                 | distance |
|-------|----------------------|----------|-------|----------------------|----------|
| H(15) | H(16) <sup>8)</sup>  | 2.941    | H(16) | H(7) <sup>8)</sup>   | 3.038    |
| H(16) | H(8) <sup>8)</sup>   | 3.299    | H(16) | H(15) <sup>6)</sup>  | 2.941    |
| H(17) | C(6) <sup>5)</sup>   | 3.130    | H(17) | C(7) <sup>5)</sup>   | 3.353    |
| H(17) | H(9) <sup>5)</sup>   | 2.317    | H(17) | H(10) <sup>5)</sup>  | 2.893    |
| H(18) | C(20) <sup>5)</sup>  | 3.442    | H(18) | H(5) <sup>8)</sup>   | 3.048    |
| H(18) | H(7) <sup>8)</sup>   | 3.528    | H(18) | H(10) <sup>5)</sup>  | 3.260    |
| H(18) | H(13) <sup>8)</sup>  | 3.104    | H(18) | H(25) <sup>5)</sup>  | 3.037    |
| H(18) | H(27) <sup>5)</sup>  | 2.976    | H(19) | C(7) <sup>5)</sup>   | 3.403    |
| H(19) | H(10) <sup>5)</sup>  | 2.820    | H(19) | H(25) <sup>5)</sup>  | 3.091    |
| H(19) | H(27) <sup>5)</sup>  | 3.378    | H(20) | H(25) <sup>5)</sup>  | 3.287    |
| H(20) | H(30) <sup>1)</sup>  | 2.843    | H(21) | C(1) <sup>10)</sup>  | 3.199    |
| H(21) | C(24) <sup>10)</sup> | 3.414    | H(21) | H(1) <sup>10)</sup>  | 2.778    |
| H(21) | H(2) <sup>10)</sup>  | 2.971    | H(21) | H(3) <sup>10)</sup>  | 3.344    |
| H(21) | H(35) <sup>10)</sup> | 3.407    | H(21) | H(37) <sup>10)</sup> | 2.613    |
| H(22) | C(15) <sup>11)</sup> | 3.206    | H(22) | C(16) <sup>11)</sup> | 2.864    |
| H(22) | C(17) <sup>11)</sup> | 3.028    | H(22) | C(18) <sup>11)</sup> | 3.485    |
| H(22) | H(2) <sup>11)</sup>  | 3.313    | H(22) | H(2) <sup>10)</sup>  | 2.995    |
| H(22) | H(3) <sup>10)</sup>  | 3.589    | H(22) | H(22) <sup>11)</sup> | 3.200    |
| H(22) | H(22) <sup>2)</sup>  | 3.200    | H(22) | H(23) <sup>11)</sup> | 3.310    |
| H(23) | C(1) <sup>11)</sup>  | 3.274    | H(23) | C(21) <sup>11)</sup> | 3.580    |
| H(23) | H(2) <sup>11)</sup>  | 2.502    | H(23) | H(3) <sup>11)</sup>  | 3.483    |
| H(23) | H(6) <sup>11)</sup>  | 3.277    | H(23) | H(22) <sup>2)</sup>  | 3.310    |
| H(23) | H(29) <sup>11)</sup> | 2.693    | H(24) | H(32) <sup>4)</sup>  | 2.892    |
| H(25) | C(12) <sup>4)</sup>  | 3.322    | H(25) | C(24) <sup>4)</sup>  | 3.466    |
| H(25) | H(5) <sup>7)</sup>   | 3.463    | H(25) | H(18) <sup>4)</sup>  | 3.037    |
| H(25) | H(19) <sup>4)</sup>  | 3.091    | H(25) | H(20) <sup>4)</sup>  | 3.287    |
| H(25) | H(25) <sup>15)</sup> | 3.427    | H(25) | H(26) <sup>15)</sup> | 3.477    |
| H(25) | H(28) <sup>15)</sup> | 3.542    | H(25) | H(30) <sup>15)</sup> | 3.600    |
| H(25) | H(32) <sup>4)</sup>  | 3.503    | H(25) | H(35) <sup>4)</sup>  | 2.538    |
| H(26) | C(24) <sup>10)</sup> | 3.147    | H(26) | H(3) <sup>7)</sup>   | 3.540    |
| H(26) | H(5) <sup>7)</sup>   | 3.100    | H(26) | H(25) <sup>15)</sup> | 3.477    |
| H(26) | H(35) <sup>10)</sup> | 2.788    | H(26) | H(36) <sup>10)</sup> | 3.307    |
| H(26) | H(37) <sup>10)</sup> | 2.850    | H(27) | C(10) <sup>7)</sup>  | 3.374    |
| H(27) | C(12) <sup>4)</sup>  | 3.571    | H(27) | H(5) <sup>7)</sup>   | 3.126    |
| H(27) | H(12) <sup>7)</sup>  | 2.845    | H(27) | H(13) <sup>7)</sup>  | 3.059    |
| H(27) | H(18) <sup>4)</sup>  | 2.976    | H(27) | H(19) <sup>4)</sup>  | 3.378    |
| H(28) | C(2) <sup>3)</sup>   | 3.172    | H(28) | H(4) <sup>3)</sup>   | 3.349    |

Table 10. Distances beyond the asymmetric unit out to 3.60 Å involving hydrogens (continued)

| atom  | atom                 | distance | atom  | atom                 | distance |
|-------|----------------------|----------|-------|----------------------|----------|
| H(28) | H(5) <sup>3)</sup>   | 2.795    | H(28) | H(6) <sup>3)</sup>   | 2.878    |
| H(28) | H(25) <sup>15)</sup> | 3.542    | H(28) | H(34) <sup>2)</sup>  | 3.446    |
| H(28) | H(35) <sup>4)</sup>  | 3.101    | H(28) | H(36) <sup>4)</sup>  | 3.208    |
| H(29) | C(17) <sup>2)</sup>  | 3.282    | H(29) | C(23) <sup>2)</sup>  | 3.598    |
| H(29) | H(23) <sup>2)</sup>  | 2.693    | H(29) | H(34) <sup>2)</sup>  | 2.688    |
| H(29) | H(36) <sup>2)</sup>  | 3.210    | H(30) | H(1) <sup>10)</sup>  | 3.326    |
| H(30) | H(20) <sup>10)</sup> | 2.843    | H(30) | H(25) <sup>15)</sup> | 3.600    |
| H(30) | H(34) <sup>2)</sup>  | 3.543    | H(30) | H(35) <sup>10)</sup> | 3.446    |
| H(32) | C(2) <sup>5)</sup>   | 3.453    | H(32) | C(7) <sup>5)</sup>   | 3.371    |
| H(32) | C(8) <sup>5)</sup>   | 3.529    | H(32) | H(4) <sup>5)</sup>   | 2.584    |
| H(32) | H(6) <sup>5)</sup>   | 3.576    | H(32) | H(10) <sup>5)</sup>  | 3.589    |
| H(32) | H(24) <sup>5)</sup>  | 2.892    | H(32) | H(25) <sup>5)</sup>  | 3.503    |
| H(33) | C(5) <sup>5)</sup>   | 3.534    | H(33) | C(6) <sup>5)</sup>   | 3.401    |
| H(33) | C(10) <sup>7)</sup>  | 3.577    | H(33) | H(4) <sup>5)</sup>   | 3.222    |
| H(33) | H(12) <sup>7)</sup>  | 3.546    | H(33) | H(14) <sup>7)</sup>  | 2.784    |
| H(34) | C(2) <sup>5)</sup>   | 3.380    | H(34) | C(21) <sup>11)</sup> | 3.382    |
| H(34) | H(4) <sup>5)</sup>   | 2.602    | H(34) | H(6) <sup>5)</sup>   | 3.486    |
| H(34) | H(28) <sup>11)</sup> | 3.446    | H(34) | H(29) <sup>11)</sup> | 2.688    |
| H(34) | H(30) <sup>11)</sup> | 3.543    | H(35) | C(20) <sup>5)</sup>  | 3.432    |
| H(35) | H(21) <sup>1)</sup>  | 3.407    | H(35) | H(25) <sup>5)</sup>  | 2.538    |
| H(35) | H(26) <sup>1)</sup>  | 2.788    | H(35) | H(28) <sup>5)</sup>  | 3.101    |
| H(35) | H(30) <sup>1)</sup>  | 3.446    | H(36) | C(2) <sup>11)</sup>  | 3.186    |
| H(36) | H(2) <sup>11)</sup>  | 3.567    | H(36) | H(5) <sup>11)</sup>  | 3.165    |
| H(36) | H(6) <sup>11)</sup>  | 2.486    | H(36) | H(26) <sup>1)</sup>  | 3.307    |
| H(36) | H(28) <sup>5)</sup>  | 3.208    | H(36) | H(29) <sup>11)</sup> | 3.210    |
| H(37) | C(15) <sup>1)</sup>  | 3.555    | H(37) | H(2) <sup>11)</sup>  | 3.555    |
| H(37) | H(3) <sup>11)</sup>  | 3.348    | H(37) | H(21) <sup>1)</sup>  | 2.613    |
| H(37) | H(26) <sup>1)</sup>  | 2.850    |       |                      |          |

Symmetry Operators:

- |                                 |                                  |
|---------------------------------|----------------------------------|
| (1) $-X+Y+2/3, -X+1/3, Z+1/3-1$ | (2) $-Y+1/3, X-Y+2/3-1, Z+2/3-1$ |
| (3) $-X+2/3, -Y+1/3, -Z+1/3$    | (4) $Y+1/3, -X+Y+2/3, -Z+2/3$    |
| (5) $X-Y+1/3, X+2/3-1, -Z+2/3$  | (6) $Y+1/3, -X+Y+2/3, -Z+2/3-1$  |
| (7) $X, Y, Z+1$                 | (8) $X-Y+1/3, X+2/3-1, -Z+2/3-1$ |
| (9) $X, Y, Z-1$                 | (10) $-Y+1/3, X-Y+2/3-1, Z+2/3$  |
| (11) $-X+Y+2/3, -X+1/3, Z+1/3$  | (12) $-X+Y+1, -X+1, Z$           |
| (13) $-X+1/3+1, -Y+2/3, -Z+2/3$ | (14) $-Y+1, X-Y, Z$              |
| (15) $-X+2/3, -Y+1/3, -Z+1/3+1$ |                                  |

X-ray Structure Report for  $\text{Me}_2\text{Al}[\mu_2\text{-O-2-(}^t\text{BuN=CH)C}_6\text{H}_4\text{]}(\text{AlMe}_3)$  (**3b**)

February 22, 2007

## Experimental

### Data Collection

A colorless block crystal of  $C_{16}H_{29}NOAl_2$  having approximate dimensions of 0.30 x 0.16 x 0.12 mm was mounted on a glass fiber. All measurements were made on a Rigaku RAXIS RAPID imaging plate area detector with graphite monochromated Mo-K $\alpha$  radiation.

Indexing was performed from 3 oscillations that were exposed for 240 seconds. The crystal-to-detector distance was 127.40 mm.

Cell constants and an orientation matrix for data collection corresponded to a primitive monoclinic cell with dimensions:

$$\begin{aligned} a &= 11.1926(6) \text{ \AA} \\ b &= 14.3616(7) \text{ \AA} & \beta &= 108.4732(18)^\circ \\ c &= 12.9141(8) \text{ \AA} \\ V &= 1968.89(19) \text{ \AA}^3 \end{aligned}$$

For  $Z = 4$  and F.W. = 305.37, the calculated density is 1.030 g/cm<sup>3</sup>. The systematic absences of:

$$\begin{aligned} h0l: & h+l \pm 2n \\ 0k0: & k \pm 2n \end{aligned}$$

uniquely determine the space group to be:

$$P2_1/n \text{ (#14)}$$

The data were collected at a temperature of  $-30 \pm 1^\circ\text{C}$  to a maximum  $2\theta$  value of  $54.9^\circ$ . A total of 44 oscillation images were collected. A sweep of data was done using  $\omega$  scans from  $130.0$  to  $190.0^\circ$  in  $5.0^\circ$  step, at  $\chi=45.0^\circ$  and  $\phi = 0.0^\circ$ . The exposure rate was 180.0 [sec./ $^\circ$ ]. A second sweep was performed using  $\omega$  scans from  $0.0$  to  $160.0^\circ$  in  $5.0^\circ$  step, at  $\chi=45.0^\circ$  and  $\phi = 180.0^\circ$ . The exposure rate was 180.0 [sec./ $^\circ$ ]. The crystal-to-detector distance was 127.40 mm. Readout was performed in the 0.100 mm pixel mode.

## Data Reduction

Of the 19033 reflections that were collected, 4466 were unique ( $R_{\text{int}} = 0.045$ ); equivalent reflections were merged.

The linear absorption coefficient,  $\mu$ , for Mo-K $\alpha$  radiation is 1.446 cm<sup>-1</sup>. An empirical absorption correction was applied which resulted in transmission factors ranging from 0.762 to 0.983. The data were corrected for Lorentz and polarization effects.

## Structure Solution and Refinement

The structure was solved by heavy-atom Patterson methods<sup>1</sup> and expanded using Fourier techniques<sup>2</sup>. The non-hydrogen atoms were refined anisotropically. Hydrogen atoms were refined using the riding model. The final cycle of full-matrix least-squares refinement<sup>3</sup> on  $F^2$  was based on 2129 observed reflections and 210 variable parameters and converged (largest parameter shift was 0.00 times its esd) with unweighted and weighted agreement factors of:

$$R1 = \sum ||F_o| - |F_c|| / \sum |F_o| = 0.0419$$

$$wR2 = [ \sum ( w (F_o^2 - F_c^2)^2 ) / \sum w(F_o^2)^2 ]^{1/2} = 0.1141$$

The standard deviation of an observation of unit weight<sup>4</sup> was 1.01. A Sheldrick weighting scheme was used. Plots of  $\sum w (|F_o| - |F_c|)^2$  versus  $|F_o|$ , reflection order in data collection,  $\sin \theta/\lambda$  and various classes of indices showed no unusual trends. The maximum and minimum peaks on the final difference Fourier map corresponded to 0.17 and -0.20 e<sup>-</sup>/Å<sup>3</sup>, respectively.

Neutral atom scattering factors were taken from Cromer and Waber<sup>5</sup>. Anomalous dispersion effects were included in  $F_{\text{calc}}$ <sup>6</sup>; the values for  $\Delta f'$  and  $\Delta f''$  were those of Creagh and McAuley<sup>7</sup>. The values for the mass attenuation coefficients are those of Creagh and Hubbell<sup>8</sup>. All calculations were performed using the CrystalStructure<sup>9,10</sup> crystallographic software package.

## References

(1) PATTY: Beurskens, P.T., Admiraal, G., Beurskens, G., Bosman, W.P., Garcia-Granda, S., Gould, R.O., Smits, J.M.M. and Smykalla, C. (1992). The DIRDIF program system, Technical Report of the Crystallography Laboratory, University of Nijmegen, The Netherlands.

(2) DIRDIF99: Beurskens, P.T., Admiraal, G., Beurskens, G., Bosman, W.P., de Gelder, R., Israel, R. and Smits, J.M.M.(1999). The DIRDIF-99 program system, Technical Report of the Crystallography Laboratory, University of Nijmegen, The Netherlands.

(3) Least Squares function minimized:

$$\sum w(F_o^2 - F_c^2)^2 \quad \text{where } w = \text{Least Squares weights.}$$

(4) Standard deviation of an observation of unit weight:

$$[\sum w(F_o^2 - F_c^2)^2 / (N_o - N_v)]^{1/2}$$

where:  $N_o$  = number of observations  
 $N_v$  = number of variables

(5) Cromer, D. T. & Waber, J. T.; "International Tables for X-ray Crystallography", Vol. IV, The Kynoch Press, Birmingham, England, Table 2.2 A (1974).

(6) Ibers, J. A. & Hamilton, W. C.; Acta Crystallogr., 17, 781 (1964).

(7) Creagh, D. C. & McAuley, W.J. ; "International Tables for Crystallography", Vol C, (A.J.C. Wilson, ed.), Kluwer Academic Publishers, Boston, Table 4.2.6.8, pages 219-222 (1992).

(8) Creagh, D. C. & Hubbell, J.H.; "International Tables for Crystallography", Vol C, (A.J.C. Wilson, ed.), Kluwer Academic Publishers, Boston, Table 4.2.4.3, pages 200-206 (1992).

(9) CrystalStructure 3.8: Crystal Structure Analysis Package, Rigaku and Rigaku/MSO (2000-2006). 9009 New Trails Dr. The Woodlands TX 77381 USA.

(10) CRYSTALS Issue 11: Carruthers, J.R., Rollett, J.S., Betteridge, P.W., Kinna, D., Pearce, L., Larsen, A., and Gabe, E. Chemical Crystallography Laboratory, Oxford, UK. (1999)

## EXPERIMENTAL DETAILS

### A. Crystal Data

|                         |                                                                                                                                                                 |
|-------------------------|-----------------------------------------------------------------------------------------------------------------------------------------------------------------|
| Empirical Formula       | $C_{16}H_{29}NOAl_2$                                                                                                                                            |
| Formula Weight          | 305.37                                                                                                                                                          |
| Crystal Color, Habit    | colorless, block                                                                                                                                                |
| Crystal Dimensions      | 0.30 X 0.16 X 0.12 mm                                                                                                                                           |
| Crystal System          | monoclinic                                                                                                                                                      |
| Lattice Type            | Primitive                                                                                                                                                       |
| Indexing Images         | 3 oscillations @ 240.0 seconds                                                                                                                                  |
| Detector Position       | 127.40 mm                                                                                                                                                       |
| Pixel Size              | 0.100 mm                                                                                                                                                        |
| Lattice Parameters      | $a = 11.1926(6) \text{ \AA}$<br>$b = 14.3616(7) \text{ \AA}$<br>$c = 12.9141(8) \text{ \AA}$<br>$\beta = 108.4732(18)^\circ$<br>$V = 1968.89(19) \text{ \AA}^3$ |
| Space Group             | $P2_1/n$ (#14)                                                                                                                                                  |
| Z value                 | 4                                                                                                                                                               |
| $D_{\text{calc}}$       | $1.030 \text{ g/cm}^3$                                                                                                                                          |
| $F_{000}$               | 664.00                                                                                                                                                          |
| $\mu(\text{MoK}\alpha)$ | $1.446 \text{ cm}^{-1}$                                                                                                                                         |

## B. Intensity Measurements

|                                                        |                                                                            |
|--------------------------------------------------------|----------------------------------------------------------------------------|
| Diffractometer                                         | Rigaku RAXIS-RAPID                                                         |
| Radiation                                              | MoK $\alpha$ ( $\lambda = 0.71075 \text{ \AA}$ )<br>graphite monochromated |
| Detector Aperture                                      | 280 mm x 256 mm                                                            |
| Data Images                                            | 44 exposures                                                               |
| $\omega$ oscillation Range ( $\chi=45.0, \phi=0.0$ )   | 130.0 - 190.0 $^\circ$                                                     |
| Exposure Rate                                          | 180.0 sec./ $^\circ$                                                       |
| $\omega$ oscillation Range ( $\chi=45.0, \phi=180.0$ ) | 0.0 - 160.0 $^\circ$                                                       |
| Exposure Rate                                          | 180.0 sec./ $^\circ$                                                       |
| Detector Position                                      | 127.40 mm                                                                  |
| Pixel Size                                             | 0.100 mm                                                                   |
| $2\theta_{\max}$                                       | 54.9 $^\circ$                                                              |
| No. of Reflections Measured                            | Total: 19033<br>Unique: 4466 ( $R_{\text{int}} = 0.045$ )                  |
| Corrections                                            | Lorentz-polarization<br>Absorption<br>(trans. factors: 0.762 - 0.983)      |



### C. Structure Solution and Refinement

|                                          |                                                |
|------------------------------------------|------------------------------------------------|
| Structure Solution                       | Patterson Methods (DIRDIF99 PATTY)             |
| Refinement                               | Full-matrix least-squares on $F^2$             |
| Function Minimized                       | $\sum w (F_o^2 - F_c^2)^2$                     |
| Least Squares Weights                    | $1/[0.0017F_o^2+1.0000\sigma(F_o^2)]/(4F_o^2)$ |
| $2\theta_{\max}$ cutoff                  | 54.9 $^\circ$                                  |
| Anomalous Dispersion                     | All non-hydrogen atoms                         |
| No. Observations ( $I > 2.00\sigma(I)$ ) | 2129                                           |
| No. Variables                            | 210                                            |
| Reflection/Parameter Ratio               | 10.14                                          |
| Residuals: R1 ( $I > 2.00\sigma(I)$ )    | 0.0419                                         |
| Residuals: wR2 ( $I > 2.00\sigma(I)$ )   | 0.1141                                         |
| Goodness of Fit Indicator                | 1.012                                          |
| Max Shift/Error in Final Cycle           | 0.000                                          |
| Maximum peak in Final Diff. Map          | 0.17 e $^-/\text{\AA}^3$                       |
| Minimum peak in Final Diff. Map          | -0.20 e $^-/\text{\AA}^3$                      |

Table 1. Atomic coordinates and  $B_{\text{iso}}/B_{\text{eq}}$

| atom  | x           | y           | z           | $B_{\text{eq}}$ |
|-------|-------------|-------------|-------------|-----------------|
| Al(1) | 0.26191(7)  | 0.53881(5)  | 0.14759(6)  | 3.666(18)       |
| Al(2) | 0.54026(8)  | 0.65368(6)  | 0.21157(8)  | 4.59(2)         |
| O(1)  | 0.43448(15) | 0.54535(12) | 0.21211(14) | 3.95(4)         |
| N(1)  | 0.23178(18) | 0.53295(14) | 0.29108(16) | 3.40(4)         |
| C(1)  | 0.2154(2)   | 0.4163(2)   | 0.0838(2)   | 5.33(7)         |
| C(2)  | 0.2008(2)   | 0.6474(2)   | 0.0570(2)   | 5.41(7)         |
| C(3)  | 0.4817(2)   | 0.46937(18) | 0.2792(2)   | 3.86(6)         |
| C(4)  | 0.5843(2)   | 0.4205(2)   | 0.2678(2)   | 4.86(7)         |
| C(5)  | 0.6315(2)   | 0.3456(2)   | 0.3380(3)   | 5.57(8)         |
| C(6)  | 0.5794(2)   | 0.3206(2)   | 0.4180(2)   | 5.39(7)         |
| C(7)  | 0.4781(2)   | 0.36940(19) | 0.4282(2)   | 4.51(6)         |
| C(8)  | 0.4258(2)   | 0.44356(17) | 0.3574(2)   | 3.64(5)         |
| C(9)  | 0.3120(2)   | 0.48667(18) | 0.3676(2)   | 3.84(6)         |
| C(10) | 0.1130(2)   | 0.5700(2)   | 0.3089(2)   | 4.07(6)         |
| C(11) | 0.0047(2)   | 0.5422(2)   | 0.2077(2)   | 5.40(8)         |
| C(12) | 0.0901(3)   | 0.5315(2)   | 0.4100(2)   | 6.00(9)         |
| C(13) | 0.1267(2)   | 0.6752(2)   | 0.3183(2)   | 5.31(7)         |
| C(14) | 0.4569(3)   | 0.7552(2)   | 0.2631(3)   | 8.09(10)        |
| C(15) | 0.7067(2)   | 0.6286(2)   | 0.3207(3)   | 6.73(9)         |
| C(16) | 0.5391(4)   | 0.6613(4)   | 0.0603(3)   | 10.37(16)       |

$$B_{\text{eq}} = 8/3 \pi^2 (U_{11}(aa^*)^2 + U_{22}(bb^*)^2 + U_{33}(cc^*)^2 + 2U_{12}(aa^*bb^*)\cos \gamma + 2U_{13}(aa^*cc^*)\cos \beta + 2U_{23}(bb^*cc^*)\cos \alpha)$$

Table 2. Atomic coordinates and  $B_{\text{iso}}$  involving hydrogens/ $B_{\text{eq}}$

| atom  | x       | y      | z      | $B_{\text{eq}}$ |
|-------|---------|--------|--------|-----------------|
| H(1)  | 0.1267  | 0.4133 | 0.0501 | 6.32            |
| H(2)  | 0.2563  | 0.4052 | 0.0308 | 6.32            |
| H(3)  | 0.2407  | 0.3704 | 0.1395 | 6.32            |
| H(4)  | 0.1132  | 0.6409 | 0.0196 | 6.40            |
| H(5)  | 0.2147  | 0.7014 | 0.1017 | 6.39            |
| H(6)  | 0.2448  | 0.6532 | 0.0054 | 6.39            |
| H(7)  | 0.6191  | 0.4420 | 0.1976 | 5.67            |
| H(8)  | 0.6986  | 0.3017 | 0.3286 | 6.18            |
| H(9)  | 0.6208  | 0.2650 | 0.4694 | 5.77            |
| H(10) | 0.4273  | 0.3444 | 0.4870 | 4.94            |
| H(11) | 0.2994  | 0.4673 | 0.4492 | 4.43            |
| H(12) | 0.0155  | 0.5720 | 0.1456 | 6.36            |
| H(13) | 0.0050  | 0.4766 | 0.1984 | 6.36            |
| H(14) | -0.0732 | 0.5609 | 0.2159 | 6.36            |
| H(15) | 0.1554  | 0.5521 | 0.4728 | 7.42            |
| H(16) | 0.0112  | 0.5527 | 0.4136 | 7.44            |
| H(17) | 0.0901  | 0.4654 | 0.4074 | 7.42            |
| H(18) | 0.0516  | 0.7018 | 0.3247 | 6.36            |
| H(19) | 0.1955  | 0.6905 | 0.3811 | 6.35            |
| H(20) | 0.1419  | 0.6989 | 0.2550 | 6.35            |
| H(21) | 0.3934  | 0.7818 | 0.2032 | 8.97            |
| H(22) | 0.4198  | 0.7310 | 0.3142 | 8.98            |
| H(23) | 0.5169  | 0.8016 | 0.2974 | 8.97            |
| H(24) | 0.6947  | 0.6028 | 0.3844 | 8.08            |
| H(25) | 0.7516  | 0.5856 | 0.2911 | 8.08            |
| H(26) | 0.7534  | 0.6848 | 0.3391 | 8.08            |
| H(27) | 0.4603  | 0.6394 | 0.0135 | 13.04           |
| H(28) | 0.5509  | 0.7241 | 0.0427 | 13.04           |
| H(29) | 0.6049  | 0.6240 | 0.0510 | 13.05           |

$$B_{\text{eq}} = 8/3 \pi^2 (U_{11}(aa^*)^2 + U_{22}(bb^*)^2 + U_{33}(cc^*)^2 + 2U_{12}(aa^*bb^*)\cos \gamma + 2U_{13}(aa^*cc^*)\cos \beta + 2U_{23}(bb^*cc^*)\cos \alpha)$$

Table 3. Anisotropic displacement parameters

| atom  | U <sub>11</sub> | U <sub>22</sub> | U <sub>33</sub> | U <sub>12</sub> | U <sub>13</sub> | U <sub>23</sub> |
|-------|-----------------|-----------------|-----------------|-----------------|-----------------|-----------------|
| Al(1) | 0.0444(4)       | 0.0478(4)       | 0.0442(4)       | 0.0041(3)       | 0.0100(3)       | 0.0054(3)       |
| Al(2) | 0.0588(5)       | 0.0589(5)       | 0.0607(6)       | -0.0079(4)      | 0.0247(4)       | 0.0041(4)       |
| O(1)  | 0.0437(9)       | 0.0470(10)      | 0.0589(11)      | 0.0047(8)       | 0.0154(8)       | 0.0089(9)       |
| N(1)  | 0.0414(11)      | 0.0413(11)      | 0.0442(12)      | 0.0004(9)       | 0.0103(9)       | 0.0020(10)      |
| C(1)  | 0.0683(18)      | 0.072(2)        | 0.0585(19)      | 0.0035(16)      | 0.0145(15)      | -0.0095(16)     |
| C(2)  | 0.0661(18)      | 0.075(2)        | 0.0604(19)      | 0.0113(15)      | 0.0144(15)      | 0.0194(16)      |
| C(3)  | 0.0405(14)      | 0.0427(15)      | 0.0537(17)      | 0.0028(11)      | 0.0011(12)      | -0.0017(13)     |
| C(4)  | 0.0469(15)      | 0.0597(18)      | 0.073(2)        | 0.0093(14)      | 0.0119(14)      | -0.0051(16)     |
| C(5)  | 0.0502(16)      | 0.0520(19)      | 0.094(2)        | 0.0160(14)      | 0.0002(17)      | -0.0123(18)     |
| C(6)  | 0.0611(18)      | 0.0458(17)      | 0.075(2)        | 0.0076(15)      | -0.0106(17)     | 0.0020(16)      |
| C(7)  | 0.0536(16)      | 0.0442(15)      | 0.0577(17)      | -0.0017(13)     | -0.0050(13)     | 0.0069(13)      |
| C(8)  | 0.0442(13)      | 0.0411(15)      | 0.0452(15)      | 0.0019(11)      | 0.0032(12)      | 0.0018(12)      |
| C(9)  | 0.0477(14)      | 0.0442(15)      | 0.0470(16)      | -0.0028(12)     | 0.0052(12)      | 0.0031(12)      |
| C(10) | 0.0469(14)      | 0.0590(18)      | 0.0473(16)      | 0.0056(12)      | 0.0128(12)      | 0.0040(13)      |
| C(11) | 0.0443(15)      | 0.088(2)        | 0.069(2)        | 0.0037(15)      | 0.0122(14)      | -0.0014(17)     |
| C(12) | 0.067(2)        | 0.101(2)        | 0.068(2)        | 0.0101(18)      | 0.0319(17)      | 0.0149(19)      |
| C(13) | 0.0660(19)      | 0.062(2)        | 0.073(2)        | 0.0177(15)      | 0.0209(16)      | -0.0007(16)     |
| C(14) | 0.097(2)        | 0.066(2)        | 0.120(3)        | 0.0015(19)      | 0.001(2)        | -0.021(2)       |
| C(15) | 0.0574(18)      | 0.088(2)        | 0.110(2)        | -0.0115(18)     | 0.0264(18)      | 0.001(2)        |
| C(16) | 0.134(3)        | 0.188(5)        | 0.091(3)        | -0.038(3)       | 0.062(2)        | 0.014(3)        |

The general temperature factor expression:  $\exp(-2\pi^2(a^2U_{11}h^2 + b^2U_{22}k^2 + c^2U_{33}l^2 + 2a*b*U_{12}hk + 2a*c*U_{13}hl + 2b*c*U_{23}kl))$

Table 4. Bond lengths (Å)

| atom  | atom  | distance   | atom  | atom  | distance |
|-------|-------|------------|-------|-------|----------|
| Al(1) | O(1)  | 1.8477(16) | Al(1) | N(1)  | 1.988(2) |
| Al(1) | C(1)  | 1.943(3)   | Al(1) | C(2)  | 1.939(3) |
| Al(2) | O(1)  | 1.9564(19) | Al(2) | C(14) | 1.957(4) |
| Al(2) | C(15) | 1.981(3)   | Al(2) | C(16) | 1.952(4) |
| O(1)  | C(3)  | 1.389(3)   | N(1)  | C(9)  | 1.289(2) |
| N(1)  | C(10) | 1.515(3)   | C(3)  | C(4)  | 1.393(4) |
| C(3)  | C(8)  | 1.397(4)   | C(4)  | C(5)  | 1.397(4) |
| C(5)  | C(6)  | 1.386(5)   | C(6)  | C(7)  | 1.374(4) |
| C(7)  | C(8)  | 1.405(3)   | C(8)  | C(9)  | 1.459(4) |
| C(10) | C(11) | 1.526(3)   | C(10) | C(12) | 1.513(4) |
| C(10) | C(13) | 1.519(4)   |       |       |          |

Table 5. Bond lengths involving hydrogens (Å)

| atom  | atom  | distance | atom  | atom  | distance |
|-------|-------|----------|-------|-------|----------|
| C(1)  | H(1)  | 0.950    | C(1)  | H(2)  | 0.950    |
| C(1)  | H(3)  | 0.950    | C(2)  | H(4)  | 0.950    |
| C(2)  | H(5)  | 0.950    | C(2)  | H(6)  | 0.950    |
| C(4)  | H(7)  | 1.137    | C(5)  | H(8)  | 1.018    |
| C(6)  | H(9)  | 1.048    | C(7)  | H(10) | 1.141    |
| C(9)  | H(11) | 1.141    | C(11) | H(12) | 0.950    |
| C(11) | H(13) | 0.950    | C(11) | H(14) | 0.950    |
| C(12) | H(15) | 0.950    | C(12) | H(16) | 0.950    |
| C(12) | H(17) | 0.950    | C(13) | H(18) | 0.950    |
| C(13) | H(19) | 0.950    | C(13) | H(20) | 0.950    |
| C(14) | H(21) | 0.950    | C(14) | H(22) | 0.950    |
| C(14) | H(23) | 0.950    | C(15) | H(24) | 0.950    |
| C(15) | H(25) | 0.950    | C(15) | H(26) | 0.950    |
| C(16) | H(27) | 0.950    | C(16) | H(28) | 0.950    |
| C(16) | H(29) | 0.950    |       |       |          |

Table 6. Bond angles (°)

| atom  | atom  | atom  | angle      | atom  | atom  | atom  | angle      |
|-------|-------|-------|------------|-------|-------|-------|------------|
| O(1)  | Al(1) | N(1)  | 92.50(8)   | O(1)  | Al(1) | C(1)  | 109.79(10) |
| O(1)  | Al(1) | C(2)  | 110.48(11) | N(1)  | Al(1) | C(1)  | 104.78(12) |
| N(1)  | Al(1) | C(2)  | 117.70(12) | C(1)  | Al(1) | C(2)  | 118.45(12) |
| O(1)  | Al(2) | C(14) | 103.71(14) | O(1)  | Al(2) | C(15) | 106.66(12) |
| O(1)  | Al(2) | C(16) | 103.65(16) | C(14) | Al(2) | C(15) | 109.59(16) |
| C(14) | Al(2) | C(16) | 116.4(2)   | C(15) | Al(2) | C(16) | 115.41(19) |
| Al(1) | O(1)  | Al(2) | 125.88(9)  | Al(1) | O(1)  | C(3)  | 112.21(15) |
| Al(2) | O(1)  | C(3)  | 121.05(13) | Al(1) | N(1)  | C(9)  | 116.99(19) |
| Al(1) | N(1)  | C(10) | 122.87(14) | C(9)  | N(1)  | C(10) | 119.7(2)   |
| O(1)  | C(3)  | C(4)  | 119.6(2)   | O(1)  | C(3)  | C(8)  | 119.3(2)   |
| C(4)  | C(3)  | C(8)  | 121.0(2)   | C(3)  | C(4)  | C(5)  | 118.3(3)   |
| C(4)  | C(5)  | C(6)  | 121.4(3)   | C(5)  | C(6)  | C(7)  | 119.6(2)   |
| C(6)  | C(7)  | C(8)  | 120.8(3)   | C(3)  | C(8)  | C(7)  | 118.8(2)   |
| C(3)  | C(8)  | C(9)  | 123.8(2)   | C(7)  | C(8)  | C(9)  | 117.3(2)   |
| N(1)  | C(9)  | C(8)  | 124.4(2)   | N(1)  | C(10) | C(11) | 106.0(2)   |
| N(1)  | C(10) | C(12) | 113.5(2)   | N(1)  | C(10) | C(13) | 106.9(2)   |
| C(11) | C(10) | C(12) | 109.7(2)   | C(11) | C(10) | C(13) | 111.2(2)   |
| C(12) | C(10) | C(13) | 109.5(2)   |       |       |       |            |

Table 7. Bond angles involving hydrogens (°)

| atom  | atom  | atom  | angle | atom  | atom  | atom  | angle |
|-------|-------|-------|-------|-------|-------|-------|-------|
| Al(1) | C(1)  | H(1)  | 109.6 | Al(1) | C(1)  | H(2)  | 109.4 |
| Al(1) | C(1)  | H(3)  | 109.4 | H(1)  | C(1)  | H(2)  | 109.5 |
| H(1)  | C(1)  | H(3)  | 109.5 | H(2)  | C(1)  | H(3)  | 109.5 |
| Al(1) | C(2)  | H(4)  | 109.8 | Al(1) | C(2)  | H(5)  | 109.3 |
| Al(1) | C(2)  | H(6)  | 109.4 | H(4)  | C(2)  | H(5)  | 109.5 |
| H(4)  | C(2)  | H(6)  | 109.5 | H(5)  | C(2)  | H(6)  | 109.5 |
| C(3)  | C(4)  | H(7)  | 116.6 | C(5)  | C(4)  | H(7)  | 124.9 |
| C(4)  | C(5)  | H(8)  | 122.7 | C(6)  | C(5)  | H(8)  | 115.4 |
| C(5)  | C(6)  | H(9)  | 117.6 | C(7)  | C(6)  | H(9)  | 122.8 |
| C(6)  | C(7)  | H(10) | 120.2 | C(8)  | C(7)  | H(10) | 118.6 |
| N(1)  | C(9)  | H(11) | 125.0 | C(8)  | C(9)  | H(11) | 110.3 |
| C(10) | C(11) | H(12) | 109.0 | C(10) | C(11) | H(13) | 109.5 |
| C(10) | C(11) | H(14) | 109.8 | H(12) | C(11) | H(13) | 109.5 |
| H(12) | C(11) | H(14) | 109.5 | H(13) | C(11) | H(14) | 109.5 |
| C(10) | C(12) | H(15) | 109.1 | C(10) | C(12) | H(16) | 109.8 |
| C(10) | C(12) | H(17) | 109.4 | H(15) | C(12) | H(16) | 109.5 |
| H(15) | C(12) | H(17) | 109.5 | H(16) | C(12) | H(17) | 109.5 |
| C(10) | C(13) | H(18) | 109.8 | C(10) | C(13) | H(19) | 109.4 |
| C(10) | C(13) | H(20) | 109.2 | H(18) | C(13) | H(19) | 109.5 |
| H(18) | C(13) | H(20) | 109.5 | H(19) | C(13) | H(20) | 109.5 |
| Al(2) | C(14) | H(21) | 109.7 | Al(2) | C(14) | H(22) | 109.0 |
| Al(2) | C(14) | H(23) | 109.8 | H(21) | C(14) | H(22) | 109.5 |
| H(21) | C(14) | H(23) | 109.5 | H(22) | C(14) | H(23) | 109.5 |
| Al(2) | C(15) | H(24) | 109.1 | Al(2) | C(15) | H(25) | 109.2 |
| Al(2) | C(15) | H(26) | 110.0 | H(24) | C(15) | H(25) | 109.5 |
| H(24) | C(15) | H(26) | 109.5 | H(25) | C(15) | H(26) | 109.5 |
| Al(2) | C(16) | H(27) | 109.2 | Al(2) | C(16) | H(28) | 109.6 |
| Al(2) | C(16) | H(29) | 109.6 | H(27) | C(16) | H(28) | 109.5 |
| H(27) | C(16) | H(29) | 109.5 | H(28) | C(16) | H(29) | 109.5 |



Table 8. Torsion Angles(°)

| atom1 | atom2 | atom3 | atom4 | angle       | atom1 | atom2 | atom3 | atom4 | angle      |
|-------|-------|-------|-------|-------------|-------|-------|-------|-------|------------|
| O(1)  | Al(1) | N(1)  | C(9)  | -36.71(18)  | O(1)  | Al(1) | N(1)  | C(10) | 150.72(18) |
| N(1)  | Al(1) | O(1)  | Al(2) | -111.23(13) | N(1)  | Al(1) | O(1)  | C(3)  | 58.20(18)  |
| C(1)  | Al(1) | O(1)  | Al(2) | 142.09(15)  | C(1)  | Al(1) | O(1)  | C(3)  | -48.5(2)   |
| C(2)  | Al(1) | O(1)  | Al(2) | 9.64(18)    | C(2)  | Al(1) | O(1)  | C(3)  | 179.06(19) |
| C(1)  | Al(1) | N(1)  | C(9)  | 74.5(2)     | C(1)  | Al(1) | N(1)  | C(10) | -98.05(19) |
| C(2)  | Al(1) | N(1)  | C(9)  | -151.45(19) | C(2)  | Al(1) | N(1)  | C(10) | 36.0(2)    |
| C(14) | Al(2) | O(1)  | Al(1) | 51.47(17)   | C(14) | Al(2) | O(1)  | C(3)  | -117.1(2)  |
| C(15) | Al(2) | O(1)  | Al(1) | 167.14(16)  | C(15) | Al(2) | O(1)  | C(3)  | -1.4(2)    |
| C(16) | Al(2) | O(1)  | Al(1) | -70.6(2)    | C(16) | Al(2) | O(1)  | C(3)  | 120.8(2)   |
| Al(1) | O(1)  | C(3)  | C(4)  | 130.2(2)    | Al(1) | O(1)  | C(3)  | C(8)  | -50.2(2)   |
| Al(2) | O(1)  | C(3)  | C(4)  | -59.8(2)    | Al(2) | O(1)  | C(3)  | C(8)  | 119.8(2)   |
| Al(1) | N(1)  | C(9)  | C(8)  | 3.7(3)      | Al(1) | N(1)  | C(10) | C(11) | 40.6(2)    |
| Al(1) | N(1)  | C(10) | C(12) | 161.14(18)  | Al(1) | N(1)  | C(10) | C(13) | -78.0(2)   |
| C(9)  | N(1)  | C(10) | C(11) | -131.7(2)   | C(9)  | N(1)  | C(10) | C(12) | -11.2(3)   |
| C(9)  | N(1)  | C(10) | C(13) | 109.6(2)    | C(10) | N(1)  | C(9)  | C(8)  | 176.5(2)   |
| O(1)  | C(3)  | C(4)  | C(5)  | 178.6(2)    | O(1)  | C(3)  | C(8)  | C(7)  | -177.0(2)  |
| O(1)  | C(3)  | C(8)  | C(9)  | 5.7(3)      | C(4)  | C(3)  | C(8)  | C(7)  | 2.7(3)     |
| C(4)  | C(3)  | C(8)  | C(9)  | -174.7(2)   | C(8)  | C(3)  | C(4)  | C(5)  | -1.0(3)    |
| C(3)  | C(4)  | C(5)  | C(6)  | -0.7(4)     | C(4)  | C(5)  | C(6)  | C(7)  | 0.8(4)     |
| C(5)  | C(6)  | C(7)  | C(8)  | 0.9(4)      | C(6)  | C(7)  | C(8)  | C(3)  | -2.6(3)    |
| C(6)  | C(7)  | C(8)  | C(9)  | 174.9(2)    | C(3)  | C(8)  | C(9)  | N(1)  | 20.2(3)    |
| C(7)  | C(8)  | C(9)  | N(1)  | -157.2(2)   |       |       |       |       |            |

The sign is positive if when looking from atom 2 to atom 3 a clock-wise motion of atom 1 would superimpose it on atom 4.

Table 9. Distances beyond the asymmetric unit out to 3.60 Å

|      |                     |          |      |                     |          |
|------|---------------------|----------|------|---------------------|----------|
| atom | atom                | distance | atom | atom                | distance |
| C(7) | C(9) <sup>(1)</sup> | 3.581(3) | C(9) | C(7) <sup>(1)</sup> | 3.581(3) |

Symmetry Operators:

(1) -X+1,-Y+1,-Z+1

Table 10. Distances beyond the asymmetric unit out to 3.60 Å involving hydrogens

| atom  | atom                | distance | atom  | atom                | distance |
|-------|---------------------|----------|-------|---------------------|----------|
| C(1)  | H(4) <sup>1</sup>   | 3.587    | C(1)  | H(9) <sup>2</sup>   | 3.014    |
| C(1)  | H(12) <sup>1</sup>  | 3.261    | C(1)  | H(19) <sup>3</sup>  | 3.380    |
| C(1)  | H(22) <sup>3</sup>  | 3.516    | C(1)  | H(29) <sup>4</sup>  | 3.102    |
| C(2)  | H(1) <sup>1</sup>   | 3.591    | C(2)  | H(10) <sup>5</sup>  | 3.141    |
| C(2)  | H(23) <sup>6</sup>  | 3.412    | C(4)  | H(18) <sup>3</sup>  | 3.528    |
| C(5)  | H(15) <sup>7</sup>  | 3.183    | C(5)  | H(18) <sup>3</sup>  | 3.186    |
| C(5)  | H(19) <sup>7</sup>  | 3.568    | C(5)  | H(20) <sup>3</sup>  | 3.593    |
| C(6)  | H(11) <sup>7</sup>  | 3.549    | C(6)  | H(15) <sup>7</sup>  | 3.390    |
| C(6)  | H(18) <sup>3</sup>  | 3.460    | C(6)  | H(19) <sup>7</sup>  | 2.994    |
| C(6)  | H(20) <sup>3</sup>  | 3.267    | C(6)  | H(22) <sup>7</sup>  | 3.534    |
| C(7)  | H(4) <sup>3</sup>   | 3.564    | C(7)  | H(5) <sup>3</sup>   | 3.178    |
| C(7)  | H(11) <sup>7</sup>  | 3.423    | C(7)  | H(20) <sup>3</sup>  | 3.373    |
| C(7)  | H(22) <sup>7</sup>  | 3.471    | C(7)  | H(24) <sup>7</sup>  | 3.567    |
| C(8)  | H(11) <sup>7</sup>  | 3.532    | C(9)  | H(24) <sup>7</sup>  | 3.473    |
| C(11) | H(1) <sup>1</sup>   | 3.249    | C(11) | H(2) <sup>1</sup>   | 3.590    |
| C(11) | H(23) <sup>3</sup>  | 3.464    | C(11) | H(25) <sup>8</sup>  | 3.392    |
| C(12) | H(16) <sup>9</sup>  | 3.094    | C(12) | H(17) <sup>9</sup>  | 3.557    |
| C(12) | H(24) <sup>7</sup>  | 3.538    | C(13) | H(3) <sup>5</sup>   | 3.138    |
| C(13) | H(9) <sup>7</sup>   | 3.366    | C(13) | H(28) <sup>10</sup> | 3.572    |
| C(14) | H(3) <sup>5</sup>   | 3.313    | C(14) | H(4) <sup>11</sup>  | 3.547    |
| C(14) | H(10) <sup>7</sup>  | 3.390    | C(14) | H(13) <sup>5</sup>  | 3.226    |
| C(15) | H(8) <sup>12</sup>  | 3.509    | C(15) | H(10) <sup>7</sup>  | 3.305    |
| C(15) | H(11) <sup>7</sup>  | 3.295    | C(15) | H(14) <sup>13</sup> | 3.311    |
| C(15) | H(16) <sup>13</sup> | 3.413    | C(16) | H(2) <sup>4</sup>   | 3.041    |
| C(16) | H(7) <sup>4</sup>   | 3.563    | C(16) | H(8) <sup>12</sup>  | 3.474    |
| H(1)  | C(2) <sup>1</sup>   | 3.591    | H(1)  | C(11) <sup>1</sup>  | 3.249    |
| H(1)  | H(4) <sup>1</sup>   | 2.663    | H(1)  | H(9) <sup>2</sup>   | 2.756    |
| H(1)  | H(12) <sup>1</sup>  | 2.533    | H(1)  | H(13) <sup>1</sup>  | 3.460    |
| H(1)  | H(14) <sup>1</sup>  | 3.315    | H(1)  | H(22) <sup>3</sup>  | 3.282    |
| H(1)  | H(23) <sup>3</sup>  | 3.324    | H(2)  | C(11) <sup>1</sup>  | 3.590    |
| H(2)  | C(16) <sup>4</sup>  | 3.041    | H(2)  | H(9) <sup>2</sup>   | 2.853    |
| H(2)  | H(12) <sup>1</sup>  | 3.187    | H(2)  | H(14) <sup>1</sup>  | 3.232    |
| H(2)  | H(19) <sup>3</sup>  | 3.272    | H(2)  | H(27) <sup>4</sup>  | 3.457    |
| H(2)  | H(28) <sup>4</sup>  | 3.210    | H(2)  | H(29) <sup>4</sup>  | 2.177    |
| H(3)  | C(13) <sup>3</sup>  | 3.138    | H(3)  | C(14) <sup>3</sup>  | 3.313    |
| H(3)  | H(9) <sup>2</sup>   | 2.921    | H(3)  | H(18) <sup>3</sup>  | 3.285    |
| H(3)  | H(19) <sup>3</sup>  | 2.715    | H(3)  | H(20) <sup>3</sup>  | 2.918    |

Table 10. Distances beyond the asymmetric unit out to 3.60 Å involving hydrogens (continued)

| atom  | atom                 | distance | atom  | atom                 | distance |
|-------|----------------------|----------|-------|----------------------|----------|
| H(3)  | H(21) <sup>3)</sup>  | 3.152    | H(3)  | H(22) <sup>3)</sup>  | 2.876    |
| H(3)  | H(23) <sup>3)</sup>  | 3.384    | H(3)  | H(29) <sup>4)</sup>  | 3.425    |
| H(4)  | C(1) <sup>1)</sup>   | 3.587    | H(4)  | C(7) <sup>5)</sup>   | 3.564    |
| H(4)  | C(14) <sup>6)</sup>  | 3.547    | H(4)  | H(1) <sup>1)</sup>   | 2.663    |
| H(4)  | H(9) <sup>5)</sup>   | 3.208    | H(4)  | H(10) <sup>5)</sup>  | 2.955    |
| H(4)  | H(13) <sup>1)</sup>  | 3.188    | H(4)  | H(22) <sup>6)</sup>  | 3.386    |
| H(4)  | H(23) <sup>6)</sup>  | 2.849    | H(5)  | C(7) <sup>5)</sup>   | 3.178    |
| H(5)  | H(10) <sup>5)</sup>  | 2.628    | H(6)  | H(10) <sup>5)</sup>  | 3.374    |
| H(6)  | H(23) <sup>6)</sup>  | 3.131    | H(6)  | H(26) <sup>6)</sup>  | 3.188    |
| H(7)  | C(16) <sup>4)</sup>  | 3.563    | H(7)  | H(27) <sup>4)</sup>  | 2.839    |
| H(7)  | H(29) <sup>4)</sup>  | 3.520    | H(8)  | C(15) <sup>14)</sup> | 3.509    |
| H(8)  | C(16) <sup>14)</sup> | 3.474    | H(8)  | H(15) <sup>7)</sup>  | 3.318    |
| H(8)  | H(18) <sup>3)</sup>  | 3.210    | H(8)  | H(19) <sup>7)</sup>  | 3.558    |
| H(8)  | H(25) <sup>14)</sup> | 3.588    | H(8)  | H(26) <sup>14)</sup> | 2.921    |
| H(8)  | H(28) <sup>14)</sup> | 2.985    | H(8)  | H(29) <sup>14)</sup> | 3.406    |
| H(9)  | C(1) <sup>15)</sup>  | 3.014    | H(9)  | C(13) <sup>7)</sup>  | 3.366    |
| H(9)  | H(1) <sup>15)</sup>  | 2.756    | H(9)  | H(2) <sup>15)</sup>  | 2.853    |
| H(9)  | H(3) <sup>15)</sup>  | 2.921    | H(9)  | H(4) <sup>3)</sup>   | 3.208    |
| H(9)  | H(12) <sup>3)</sup>  | 3.283    | H(9)  | H(15) <sup>7)</sup>  | 3.542    |
| H(9)  | H(19) <sup>7)</sup>  | 2.418    | H(9)  | H(20) <sup>3)</sup>  | 3.542    |
| H(9)  | H(22) <sup>7)</sup>  | 2.970    | H(10) | C(2) <sup>3)</sup>   | 3.141    |
| H(10) | C(14) <sup>7)</sup>  | 3.390    | H(10) | C(15) <sup>7)</sup>  | 3.305    |
| H(10) | H(4) <sup>3)</sup>   | 2.955    | H(10) | H(5) <sup>3)</sup>   | 2.628    |
| H(10) | H(6) <sup>3)</sup>   | 3.374    | H(10) | H(22) <sup>7)</sup>  | 2.813    |
| H(10) | H(23) <sup>7)</sup>  | 3.382    | H(10) | H(24) <sup>7)</sup>  | 2.576    |
| H(10) | H(26) <sup>7)</sup>  | 3.491    | H(11) | C(6) <sup>7)</sup>   | 3.549    |
| H(11) | C(7) <sup>7)</sup>   | 3.423    | H(11) | C(8) <sup>7)</sup>   | 3.532    |
| H(11) | C(15) <sup>7)</sup>  | 3.295    | H(11) | H(21) <sup>3)</sup>  | 3.596    |
| H(11) | H(24) <sup>7)</sup>  | 2.354    | H(12) | C(1) <sup>1)</sup>   | 3.261    |
| H(12) | H(1) <sup>1)</sup>   | 2.533    | H(12) | H(2) <sup>1)</sup>   | 3.187    |
| H(12) | H(9) <sup>5)</sup>   | 3.283    | H(13) | C(14) <sup>3)</sup>  | 3.226    |
| H(13) | H(1) <sup>1)</sup>   | 3.460    | H(13) | H(4) <sup>1)</sup>   | 3.188    |
| H(13) | H(21) <sup>3)</sup>  | 3.134    | H(13) | H(23) <sup>3)</sup>  | 2.528    |
| H(14) | C(15) <sup>8)</sup>  | 3.311    | H(14) | H(1) <sup>1)</sup>   | 3.315    |
| H(14) | H(2) <sup>1)</sup>   | 3.232    | H(14) | H(25) <sup>8)</sup>  | 2.474    |
| H(14) | H(26) <sup>8)</sup>  | 3.380    | H(15) | C(5) <sup>7)</sup>   | 3.183    |
| H(15) | C(6) <sup>7)</sup>   | 3.390    | H(15) | H(8) <sup>7)</sup>   | 3.318    |

Table 10. Distances beyond the asymmetric unit out to 3.60 Å involving hydrogens (continued)

| atom  | atom                 | distance | atom  | atom                 | distance |
|-------|----------------------|----------|-------|----------------------|----------|
| H(15) | H(9) <sup>7)</sup>   | 3.542    | H(15) | H(16) <sup>9)</sup>  | 3.103    |
| H(15) | H(17) <sup>9)</sup>  | 3.564    | H(15) | H(24) <sup>7)</sup>  | 3.034    |
| H(15) | H(25) <sup>7)</sup>  | 3.505    | H(16) | C(12) <sup>9)</sup>  | 3.094    |
| H(16) | C(15) <sup>8)</sup>  | 3.413    | H(16) | H(15) <sup>9)</sup>  | 3.103    |
| H(16) | H(16) <sup>9)</sup>  | 2.773    | H(16) | H(17) <sup>9)</sup>  | 2.891    |
| H(16) | H(24) <sup>8)</sup>  | 3.516    | H(16) | H(25) <sup>8)</sup>  | 2.873    |
| H(16) | H(26) <sup>8)</sup>  | 3.330    | H(16) | H(28) <sup>10)</sup> | 3.574    |
| H(17) | C(12) <sup>9)</sup>  | 3.557    | H(17) | H(15) <sup>9)</sup>  | 3.564    |
| H(17) | H(16) <sup>9)</sup>  | 2.891    | H(17) | H(21) <sup>3)</sup>  | 3.031    |
| H(17) | H(23) <sup>3)</sup>  | 3.457    | H(17) | H(24) <sup>7)</sup>  | 3.144    |
| H(18) | C(4) <sup>5)</sup>   | 3.528    | H(18) | C(5) <sup>5)</sup>   | 3.186    |
| H(18) | C(6) <sup>5)</sup>   | 3.460    | H(18) | H(3) <sup>5)</sup>   | 3.285    |
| H(18) | H(8) <sup>5)</sup>   | 3.210    | H(18) | H(26) <sup>8)</sup>  | 3.410    |
| H(18) | H(28) <sup>10)</sup> | 3.012    | H(19) | C(1) <sup>5)</sup>   | 3.380    |
| H(19) | C(5) <sup>7)</sup>   | 3.568    | H(19) | C(6) <sup>7)</sup>   | 2.994    |
| H(19) | H(2) <sup>5)</sup>   | 3.272    | H(19) | H(3) <sup>5)</sup>   | 2.715    |
| H(19) | H(8) <sup>7)</sup>   | 3.558    | H(19) | H(9) <sup>7)</sup>   | 2.418    |
| H(19) | H(28) <sup>10)</sup> | 3.258    | H(20) | C(5) <sup>5)</sup>   | 3.593    |
| H(20) | C(6) <sup>5)</sup>   | 3.267    | H(20) | C(7) <sup>5)</sup>   | 3.373    |
| H(20) | H(3) <sup>5)</sup>   | 2.918    | H(20) | H(9) <sup>5)</sup>   | 3.542    |
| H(21) | H(3) <sup>5)</sup>   | 3.152    | H(21) | H(11) <sup>5)</sup>  | 3.596    |
| H(21) | H(13) <sup>5)</sup>  | 3.134    | H(21) | H(17) <sup>5)</sup>  | 3.031    |
| H(22) | C(1) <sup>5)</sup>   | 3.516    | H(22) | C(6) <sup>7)</sup>   | 3.534    |
| H(22) | C(7) <sup>7)</sup>   | 3.471    | H(22) | H(1) <sup>5)</sup>   | 3.282    |
| H(22) | H(3) <sup>5)</sup>   | 2.876    | H(22) | H(4) <sup>11)</sup>  | 3.386    |
| H(22) | H(9) <sup>7)</sup>   | 2.970    | H(22) | H(10) <sup>7)</sup>  | 2.813    |
| H(23) | C(2) <sup>11)</sup>  | 3.412    | H(23) | C(11) <sup>5)</sup>  | 3.464    |
| H(23) | H(1) <sup>5)</sup>   | 3.324    | H(23) | H(3) <sup>5)</sup>   | 3.384    |
| H(23) | H(4) <sup>11)</sup>  | 2.849    | H(23) | H(6) <sup>11)</sup>  | 3.131    |
| H(23) | H(10) <sup>7)</sup>  | 3.382    | H(23) | H(13) <sup>5)</sup>  | 2.528    |
| H(23) | H(17) <sup>5)</sup>  | 3.457    | H(24) | C(7) <sup>7)</sup>   | 3.567    |
| H(24) | C(9) <sup>7)</sup>   | 3.473    | H(24) | C(12) <sup>7)</sup>  | 3.538    |
| H(24) | H(10) <sup>7)</sup>  | 2.576    | H(24) | H(11) <sup>7)</sup>  | 2.354    |
| H(24) | H(15) <sup>7)</sup>  | 3.034    | H(24) | H(16) <sup>13)</sup> | 3.516    |
| H(24) | H(17) <sup>7)</sup>  | 3.144    | H(25) | C(11) <sup>13)</sup> | 3.392    |
| H(25) | H(8) <sup>12)</sup>  | 3.588    | H(25) | H(14) <sup>13)</sup> | 2.474    |
| H(25) | H(15) <sup>7)</sup>  | 3.505    | H(25) | H(16) <sup>13)</sup> | 2.873    |

Table 10. Distances beyond the asymmetric unit out to 3.60 Å involving hydrogens (continued)

| atom  | atom                 | distance | atom  | atom                 | distance |
|-------|----------------------|----------|-------|----------------------|----------|
| H(26) | H(6) <sup>11)</sup>  | 3.188    | H(26) | H(8) <sup>12)</sup>  | 2.921    |
| H(26) | H(10) <sup>7)</sup>  | 3.491    | H(26) | H(14) <sup>13)</sup> | 3.380    |
| H(26) | H(16) <sup>13)</sup> | 3.330    | H(26) | H(18) <sup>13)</sup> | 3.410    |
| H(27) | H(2) <sup>4)</sup>   | 3.457    | H(27) | H(7) <sup>4)</sup>   | 2.839    |
| H(28) | C(13) <sup>16)</sup> | 3.572    | H(28) | H(2) <sup>4)</sup>   | 3.210    |
| H(28) | H(8) <sup>12)</sup>  | 2.985    | H(28) | H(16) <sup>16)</sup> | 3.574    |
| H(28) | H(18) <sup>16)</sup> | 3.012    | H(28) | H(19) <sup>16)</sup> | 3.258    |
| H(29) | C(1) <sup>4)</sup>   | 3.102    | H(29) | H(2) <sup>4)</sup>   | 2.177    |
| H(29) | H(3) <sup>4)</sup>   | 3.425    | H(29) | H(7) <sup>4)</sup>   | 3.520    |
| H(29) | H(8) <sup>12)</sup>  | 3.406    |       |                      |          |

Symmetry Operators:

- |                           |                              |
|---------------------------|------------------------------|
| (1) -X,-Y+1,-Z            | (2) X+1/2-1,-Y+1/2,Z+1/2-1   |
| (3) -X+1/2,Y+1/2-1,-Z+1/2 | (4) -X+1,-Y+1,-Z             |
| (5) -X+1/2,Y+1/2,-Z+1/2   | (6) X+1/2-1,-Y+1/2+1,Z+1/2-1 |
| (7) -X+1,-Y+1,-Z+1        | (8) X-1,Y,Z                  |
| (9) -X,-Y+1,-Z+1          | (10) X+1/2-1,-Y+1/2+1,Z+1/2  |
| (11) X+1/2,-Y+1/2+1,Z+1/2 | (12) -X+1/2+1,Y+1/2,-Z+1/2   |
| (13) X+1,Y,Z              | (14) -X+1/2+1,Y+1/2-1,-Z+1/2 |
| (15) X+1/2,-Y+1/2,Z+1/2   | (16) X+1/2,-Y+1/2+1,Z+1/2-1  |
